# Supplementary material
Source: Royal Society of Chemistry journal article supplement (doi:10.1039/d6cy00122j)
Supplement: d6cy00122j1.pdf [file d6cy00122j1.pdf]

## Supporting Information for:

### Recyclable gold(I)-catalyzed hydrophosphoryloxylation of alkynes or 1-haloalkynes with diphenyl phosphate

Ling Chen,<sup>a\*</sup> Boling Song<sup>b</sup> and Mingzhong Cai<sup>b\*</sup>

<sup>a</sup> *College of Materials and Chemical Engineering, Pingxiang University, Pingxiang, Jiangxi 337055, China.*

<sup>b</sup> *College of Chemistry and Materials Science, Jiangxi Normal University, Nanchang, Jiangxi 330022, China*

E-mail: c1793742690@163.com; mzcai@jxnu.edu.cn

**Copies of NMR Spectra of Compounds 2a-t and 4a-p**

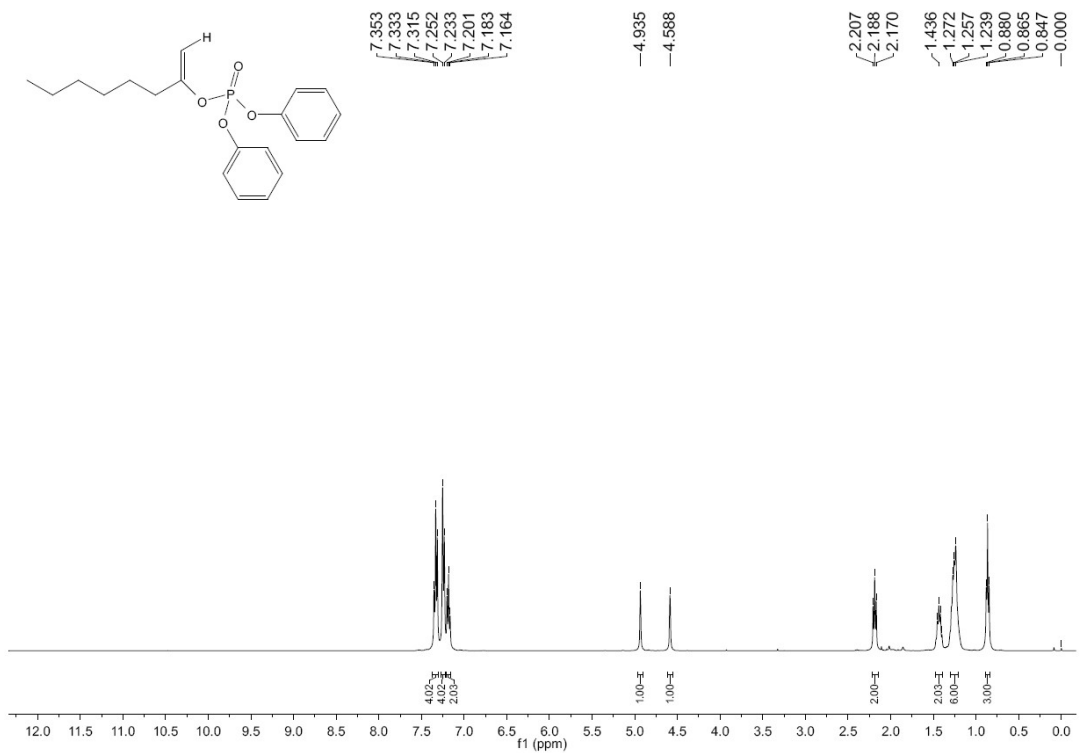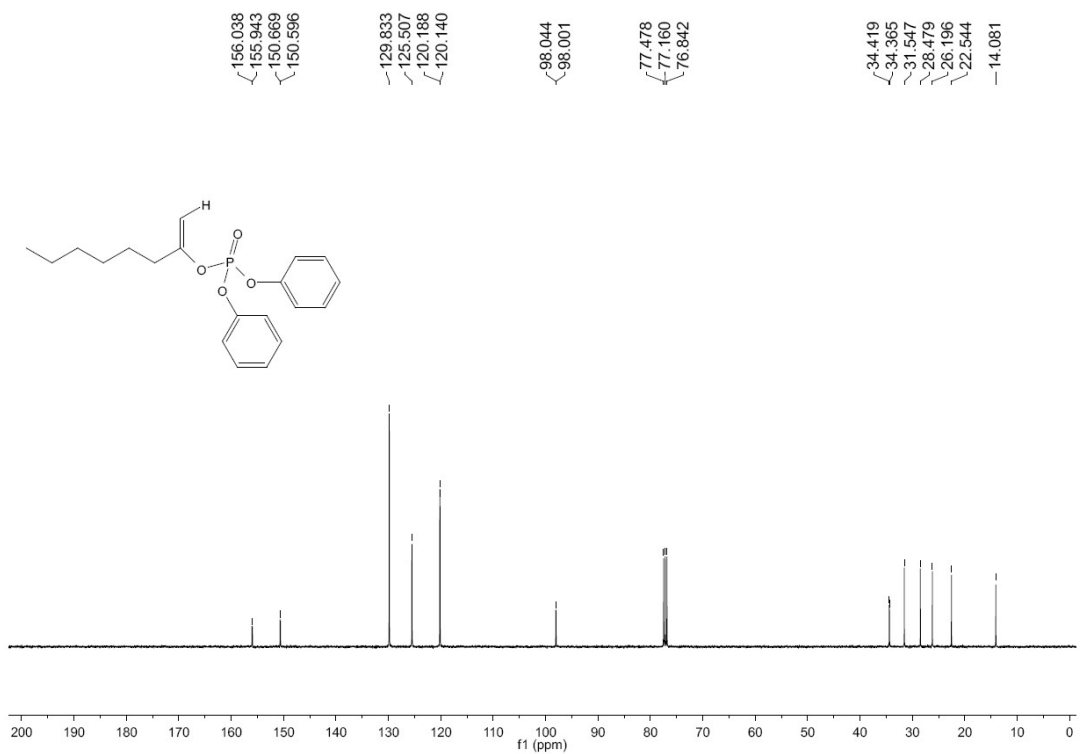

$^1\text{H}$  NMR and  $^{13}\text{C}$  NMR of Compound **2a**

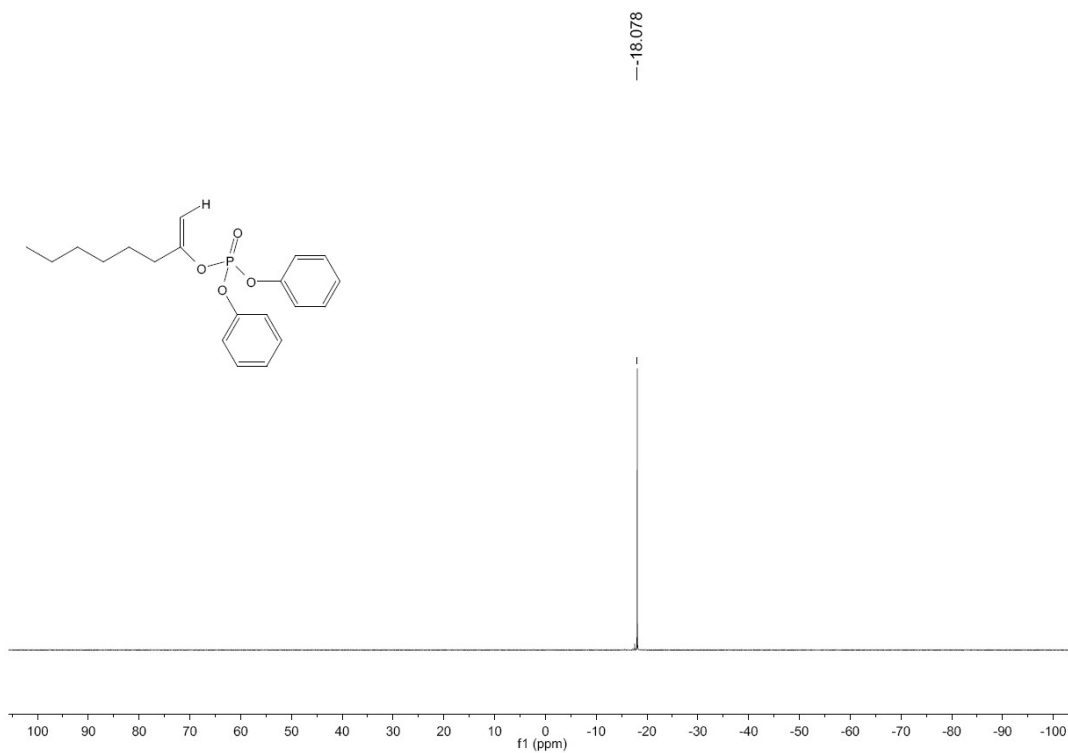

$^{31}\text{P}$  NMR of Compound **2a**

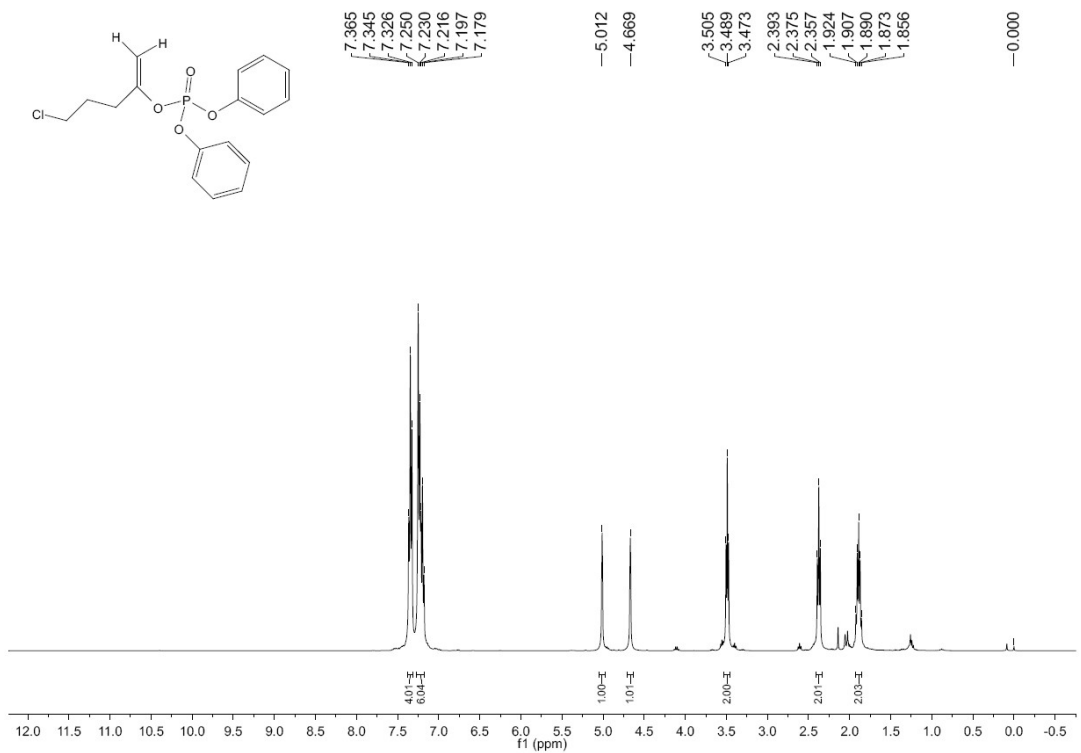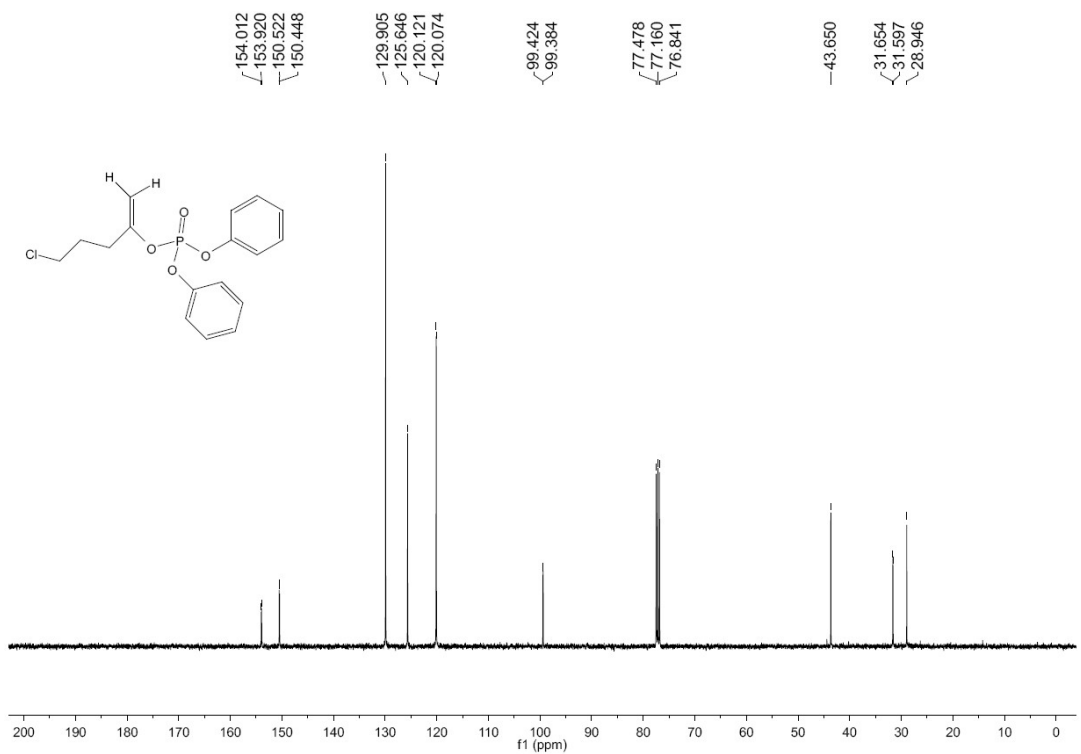

<sup>1</sup>H NMR and <sup>13</sup>C NMR of Compound 2b

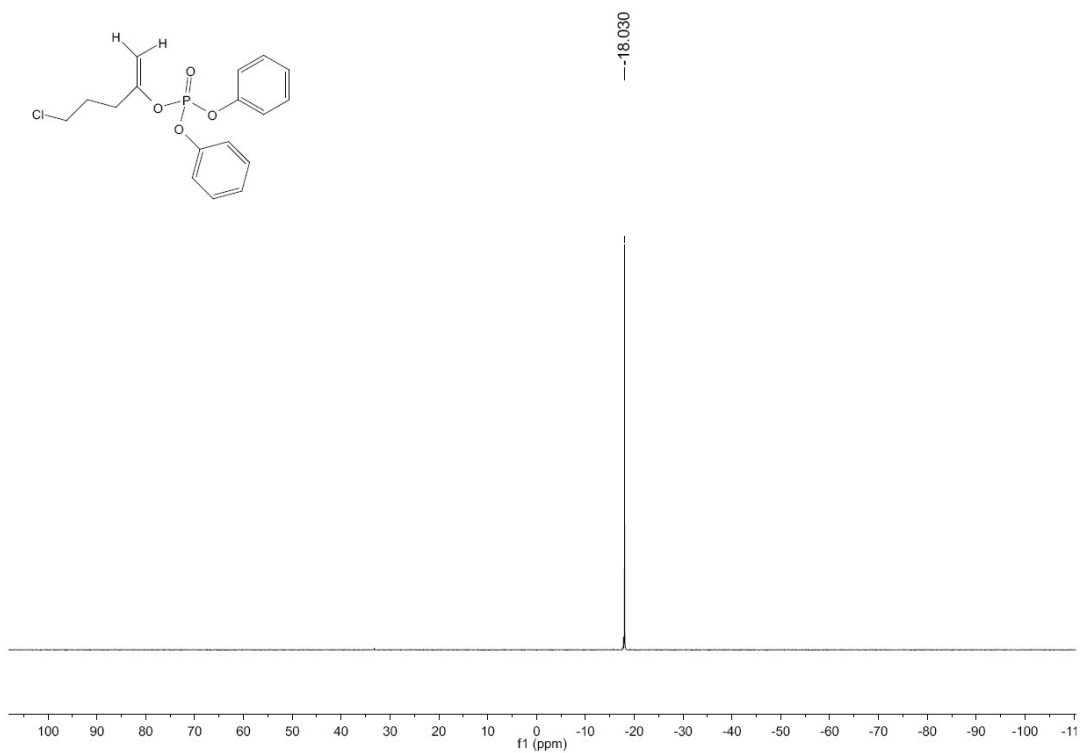

$^{31}\text{P}$  NMR of Compound **2b**

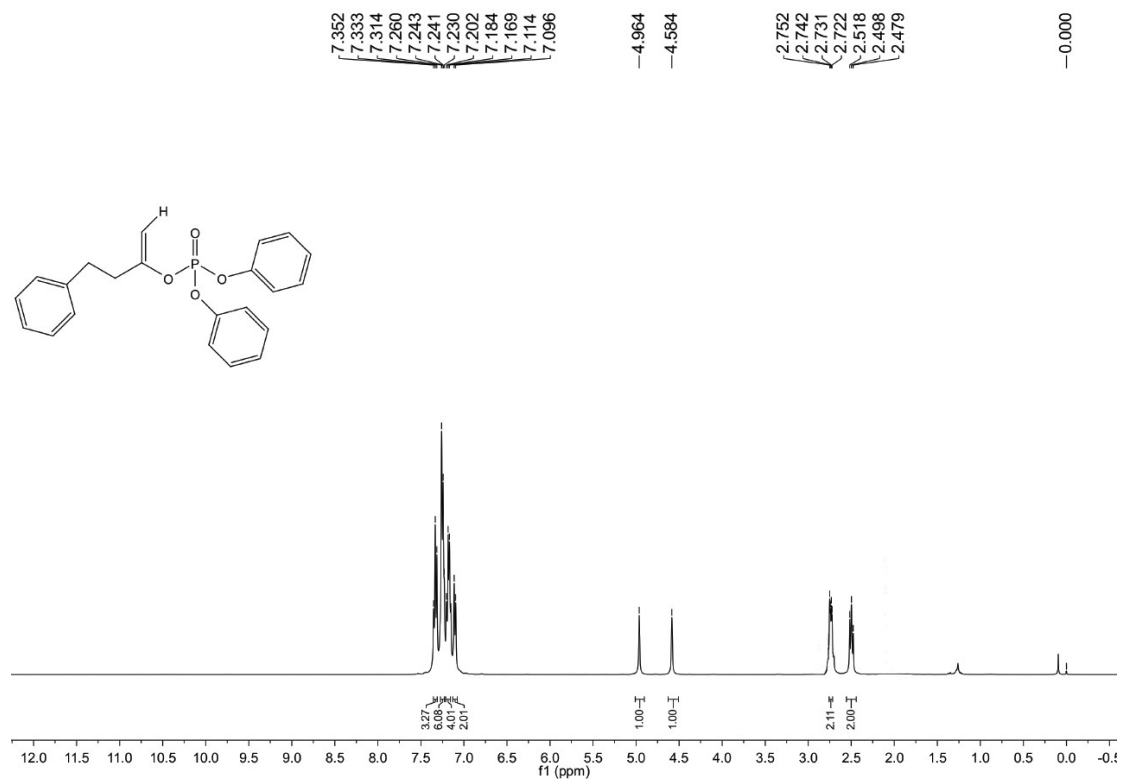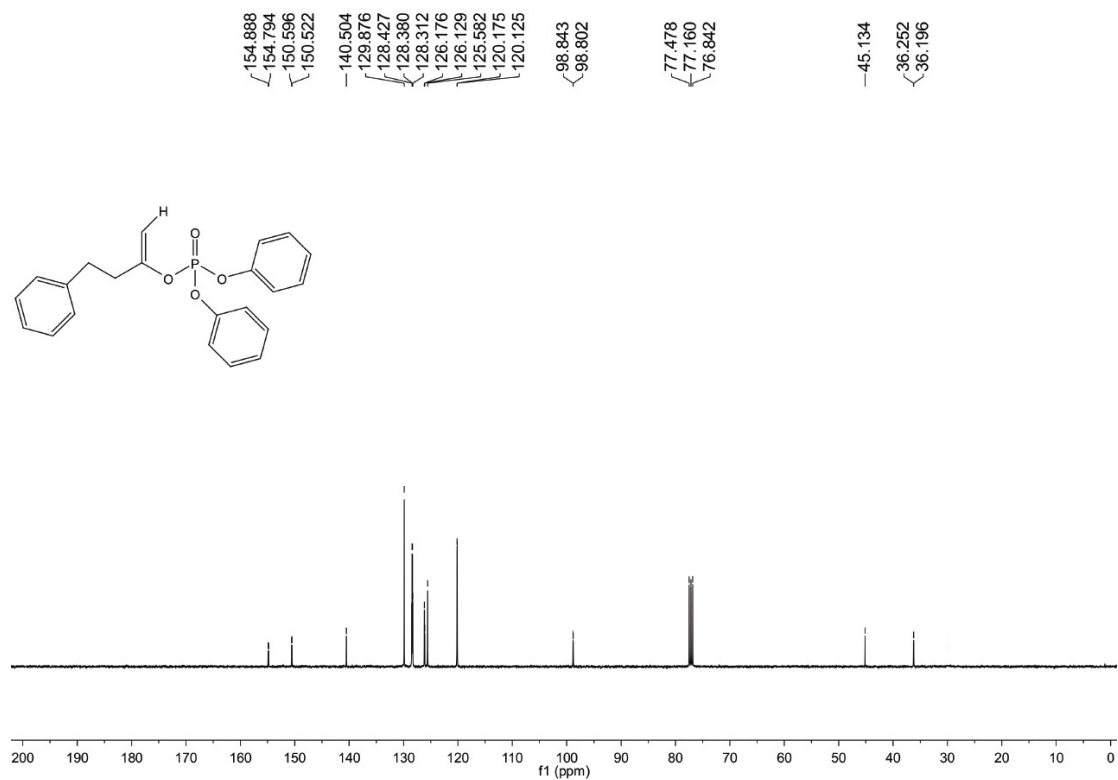

<sup>1</sup>H NMR and <sup>13</sup>C NMR of Compound **2c**

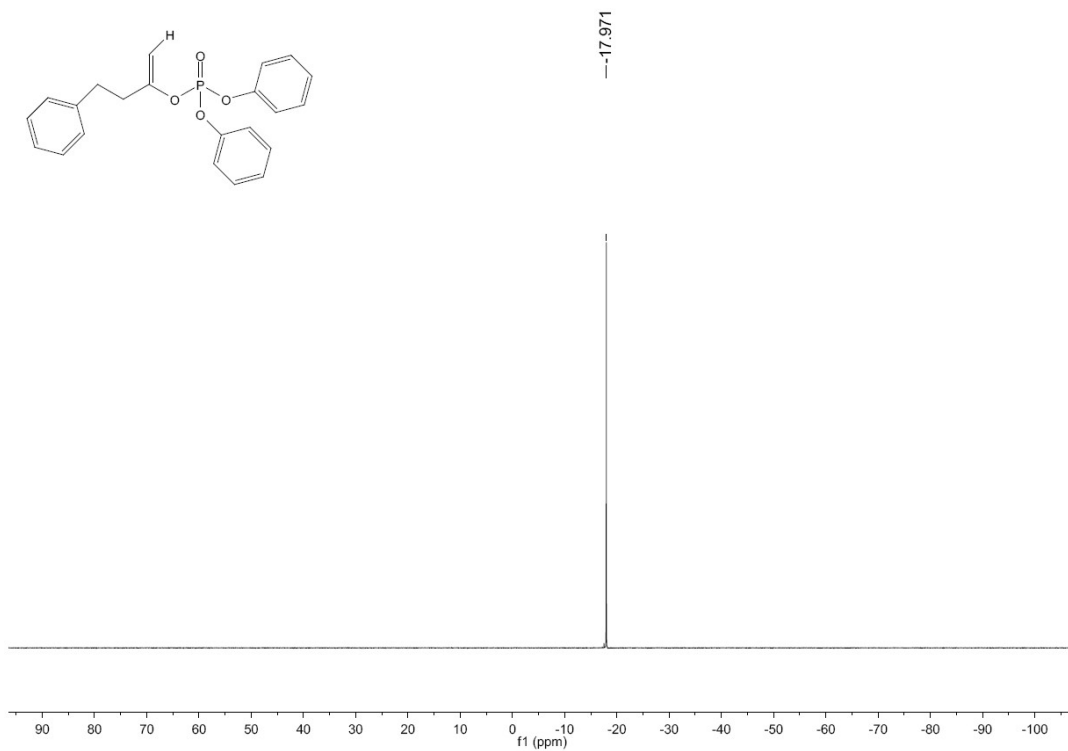

$^{31}\text{P}$  NMR of Compound **2c**

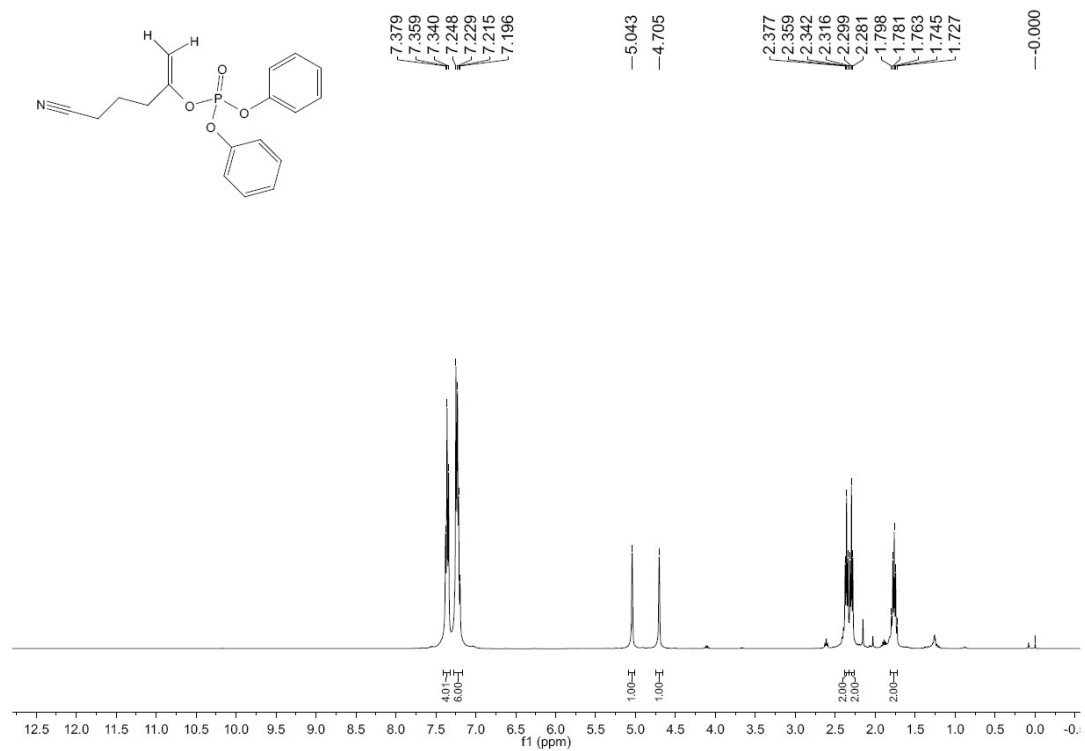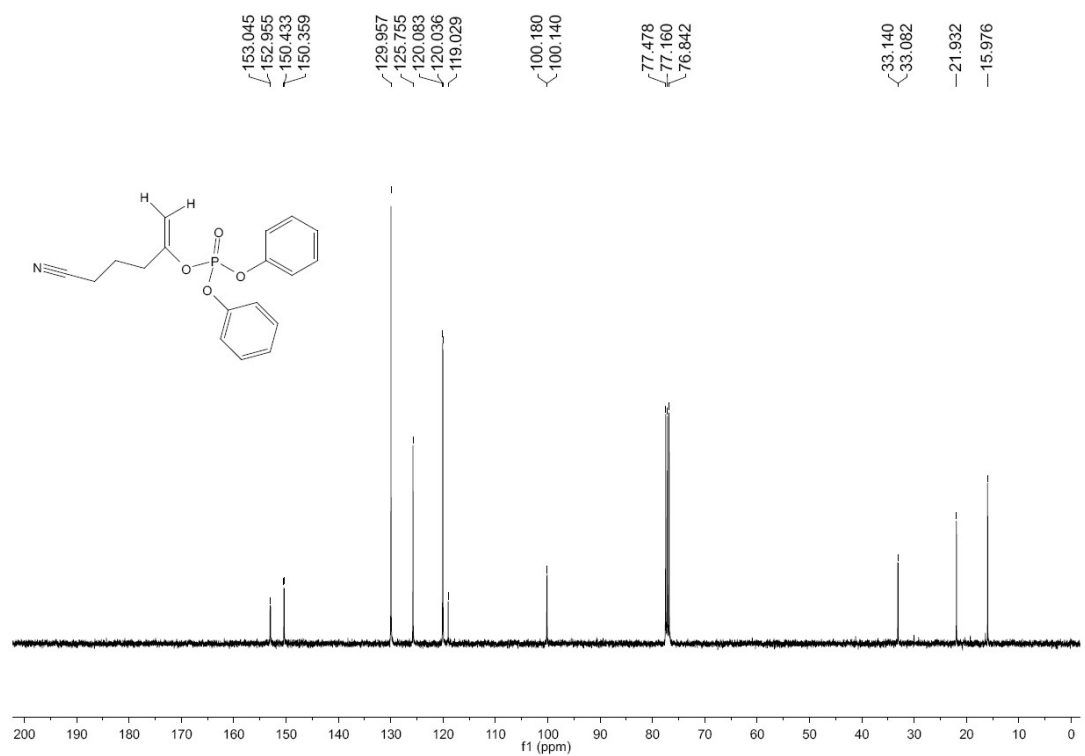

$^1\text{H}$  NMR and  $^{13}\text{C}$  NMR of Compound **2d**

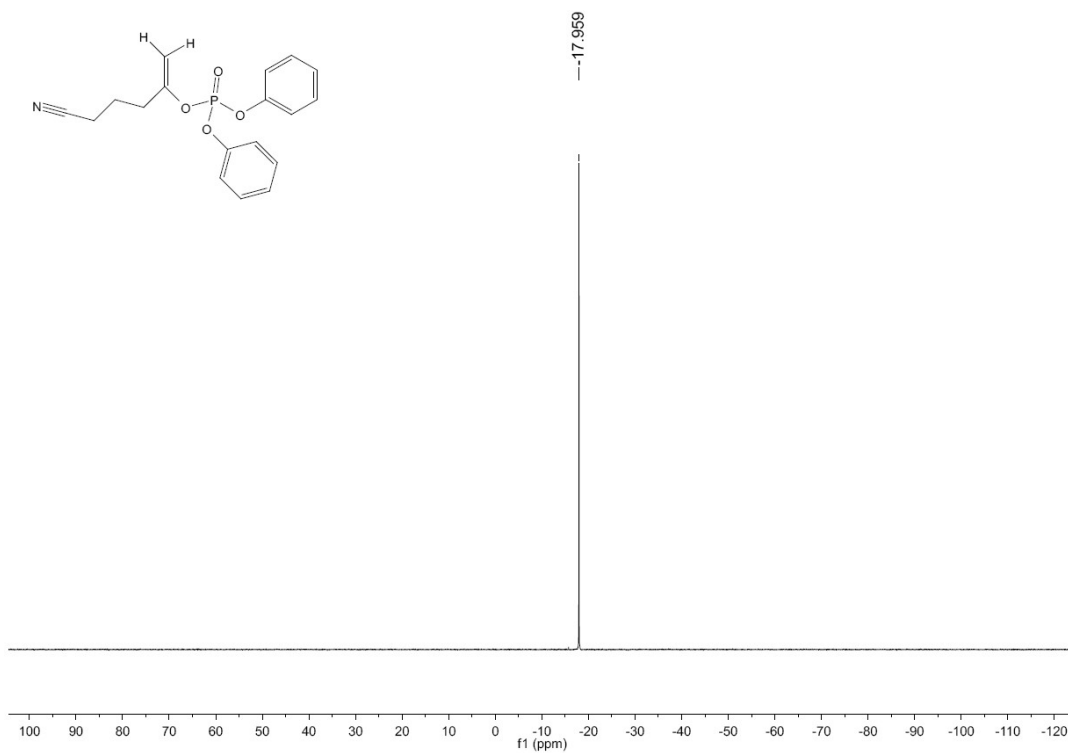

$^{31}\text{P}$  NMR of Compound **2d**

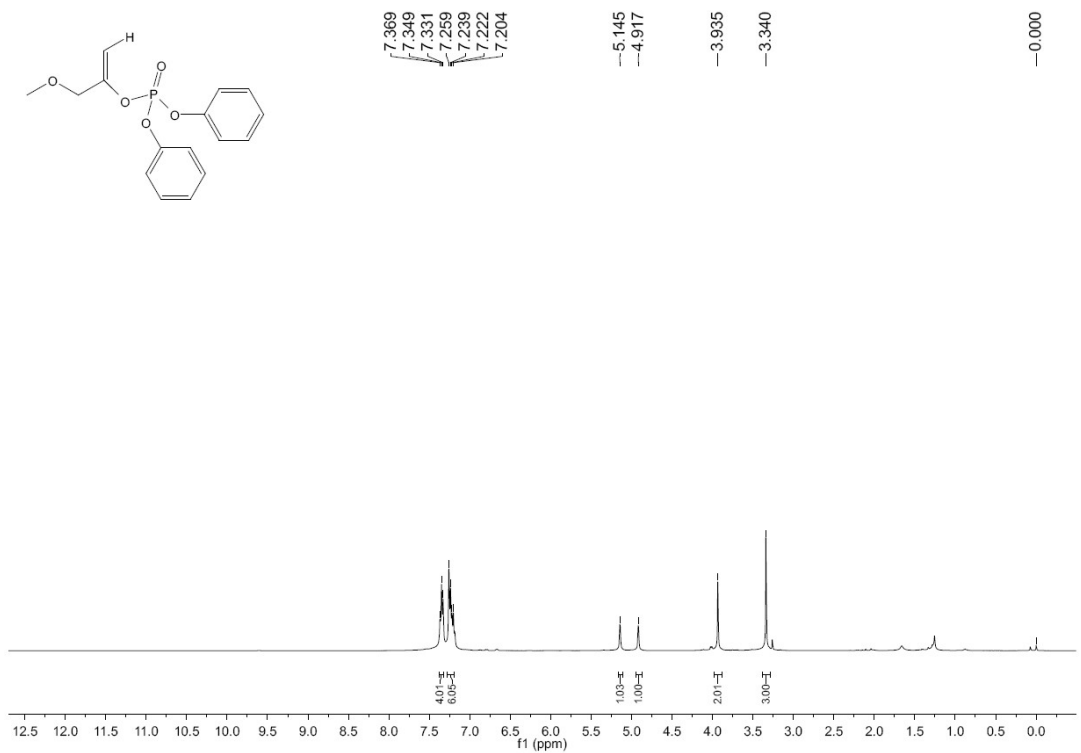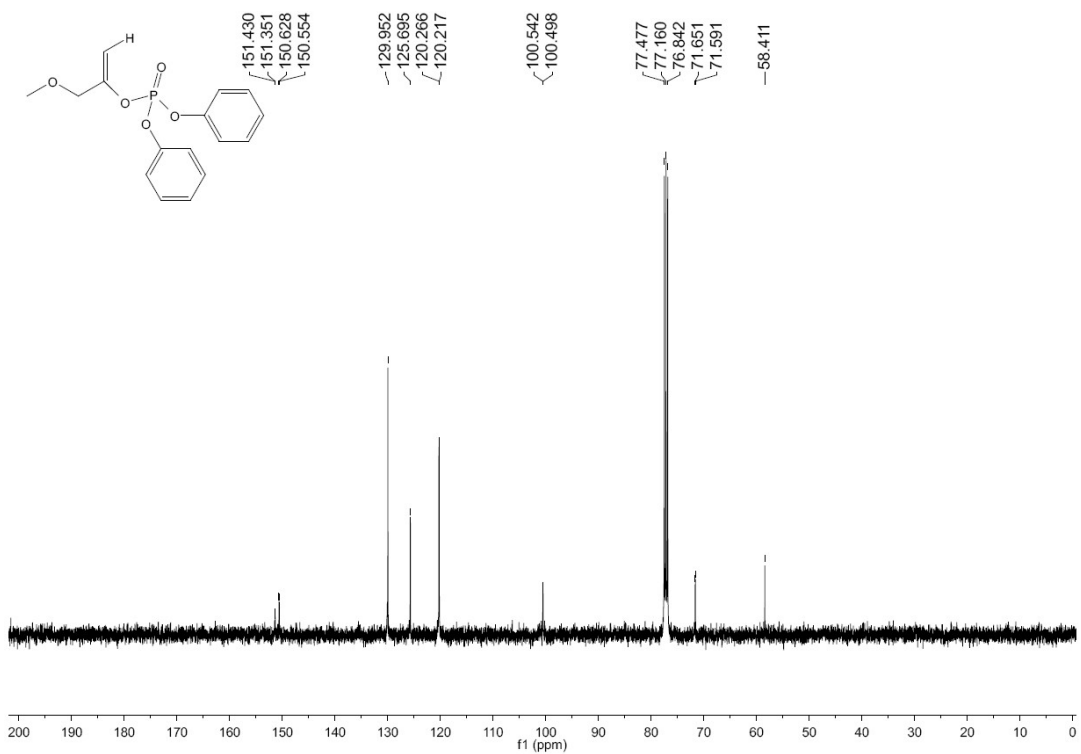

$^1\text{H}$  NMR and  $^{13}\text{C}$  NMR of Compound **2e**

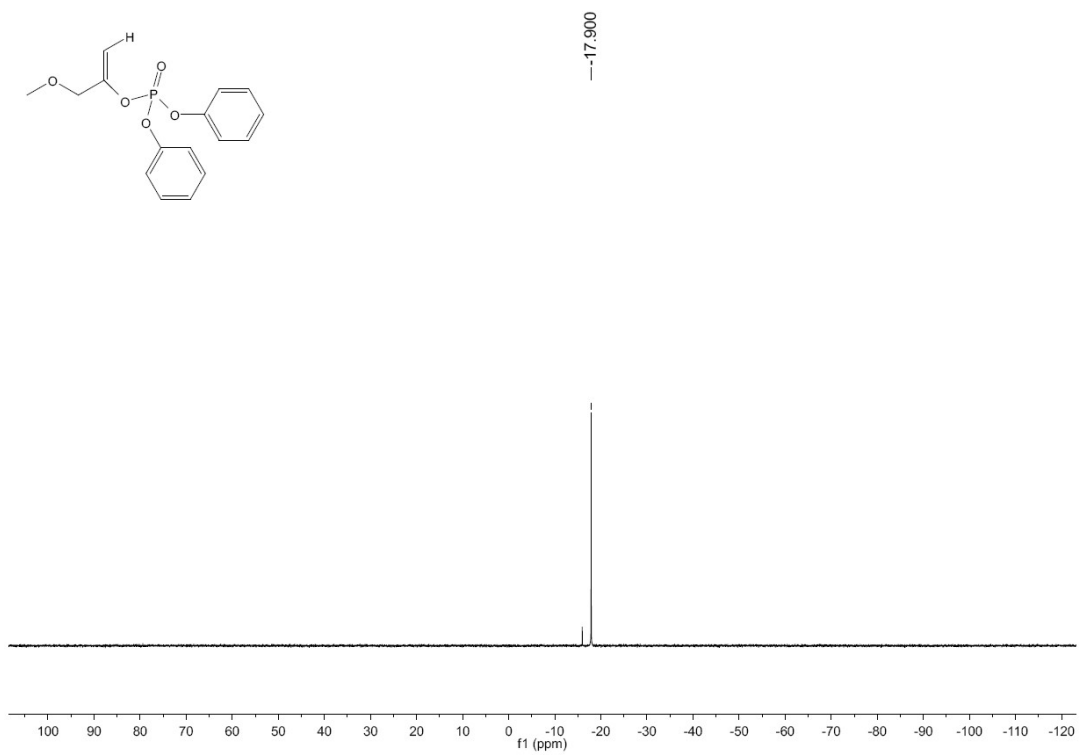

$^{31}\text{P}$  NMR of Compound 2e

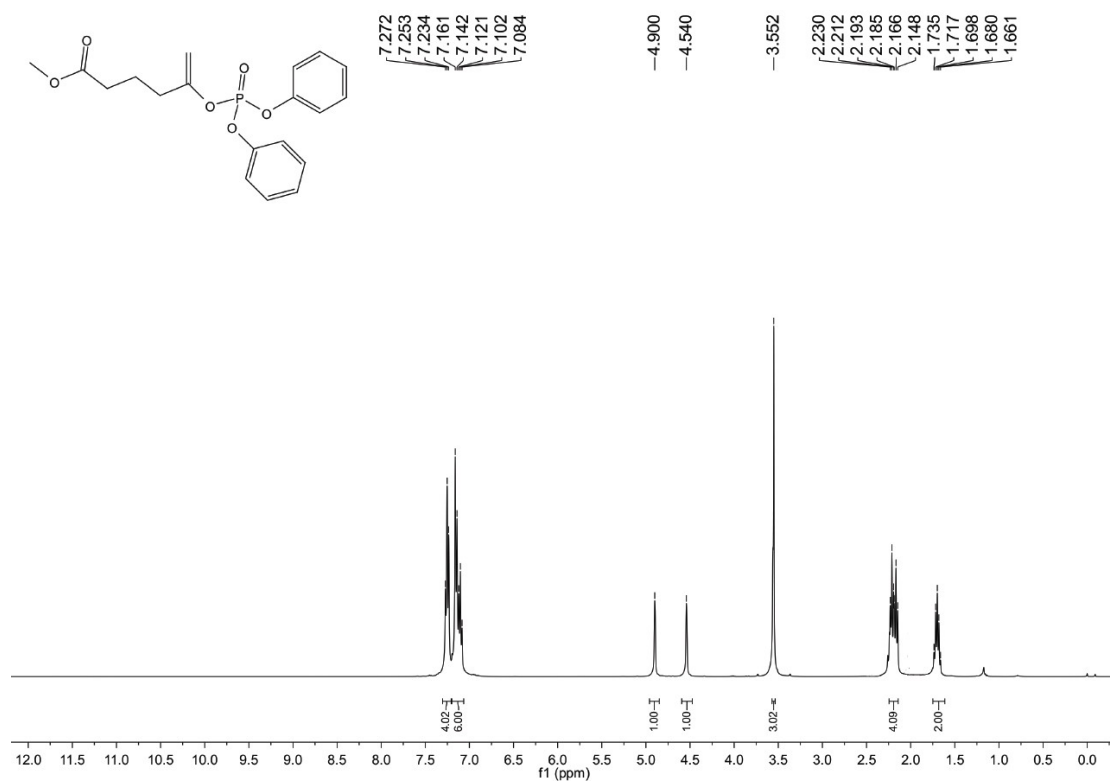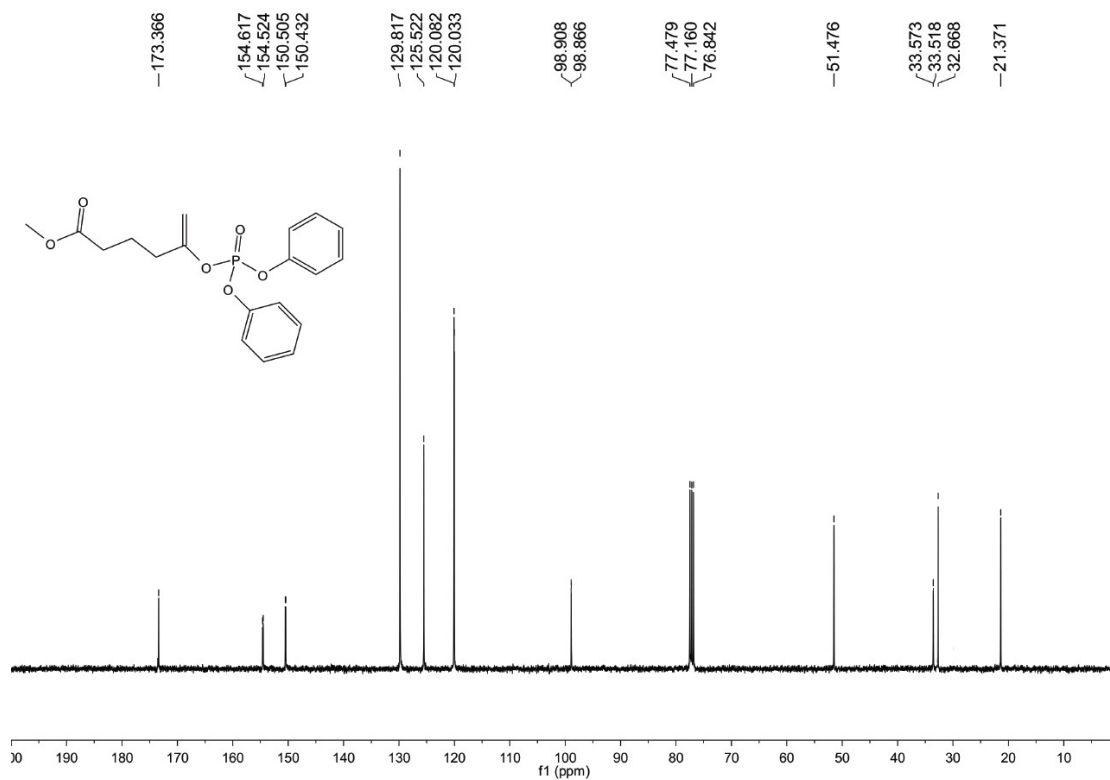

$^1\text{H}$  NMR and  $^{13}\text{C}$  NMR of Compound **2f**

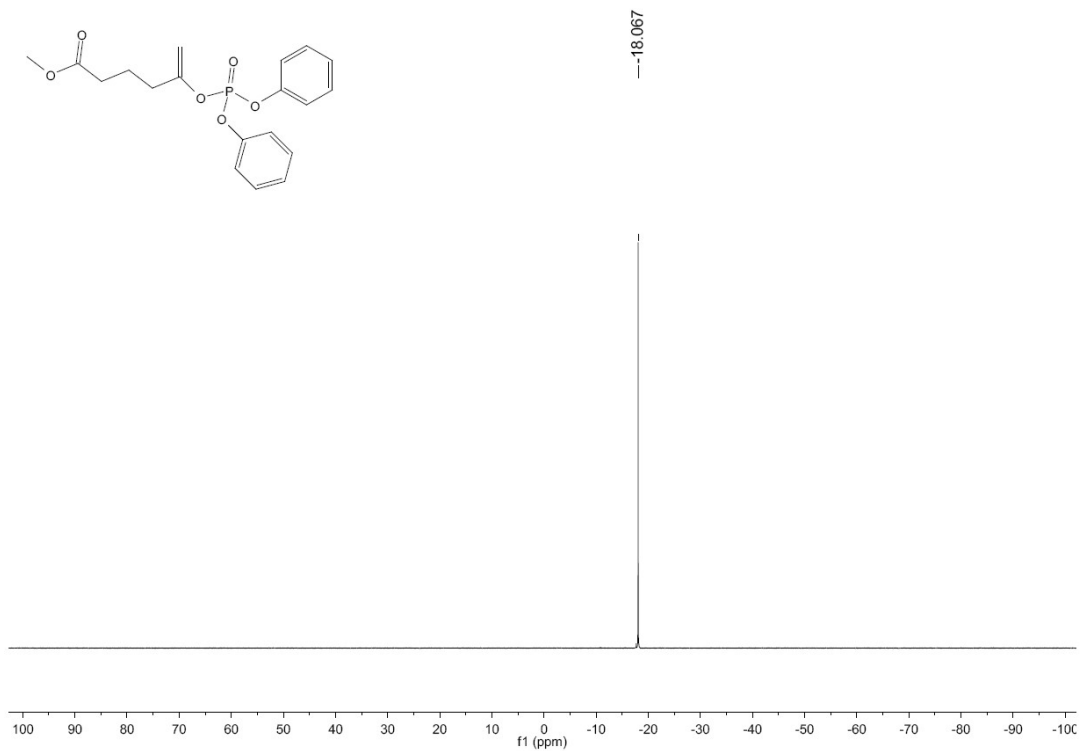

$^{31}\text{P}$  NMR of Compound **2f**

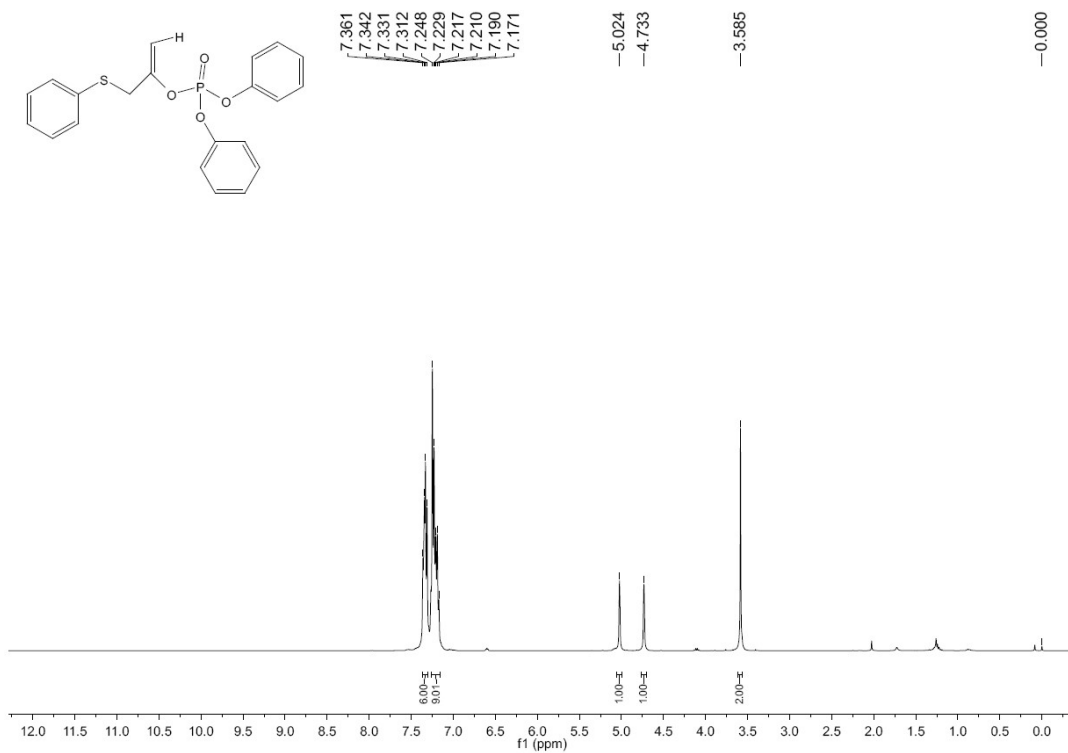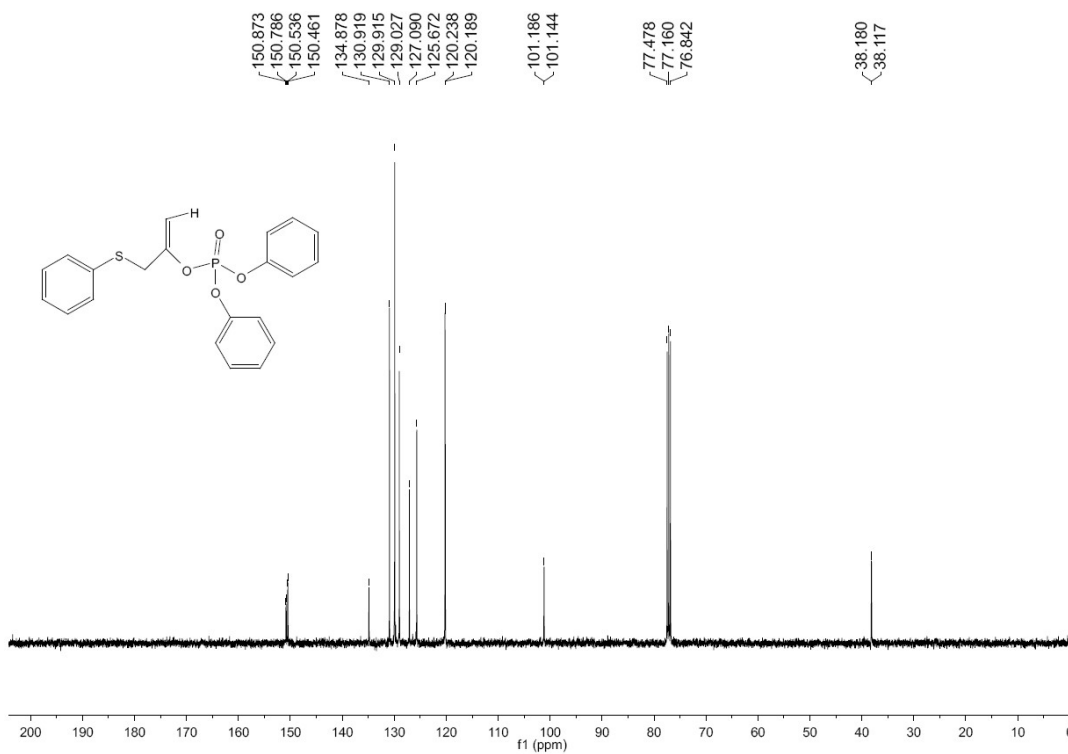

<sup>1</sup>H NMR and <sup>13</sup>C NMR of Compound 2g

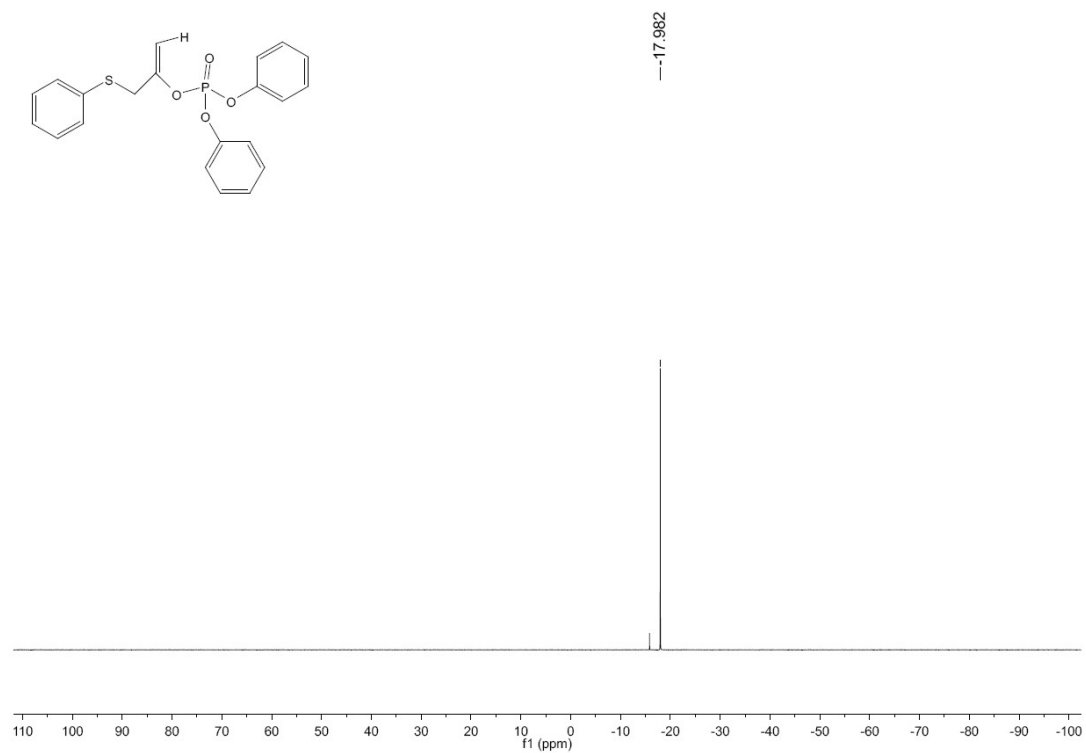

$^{31}\text{P}$  NMR of Compound **2g**

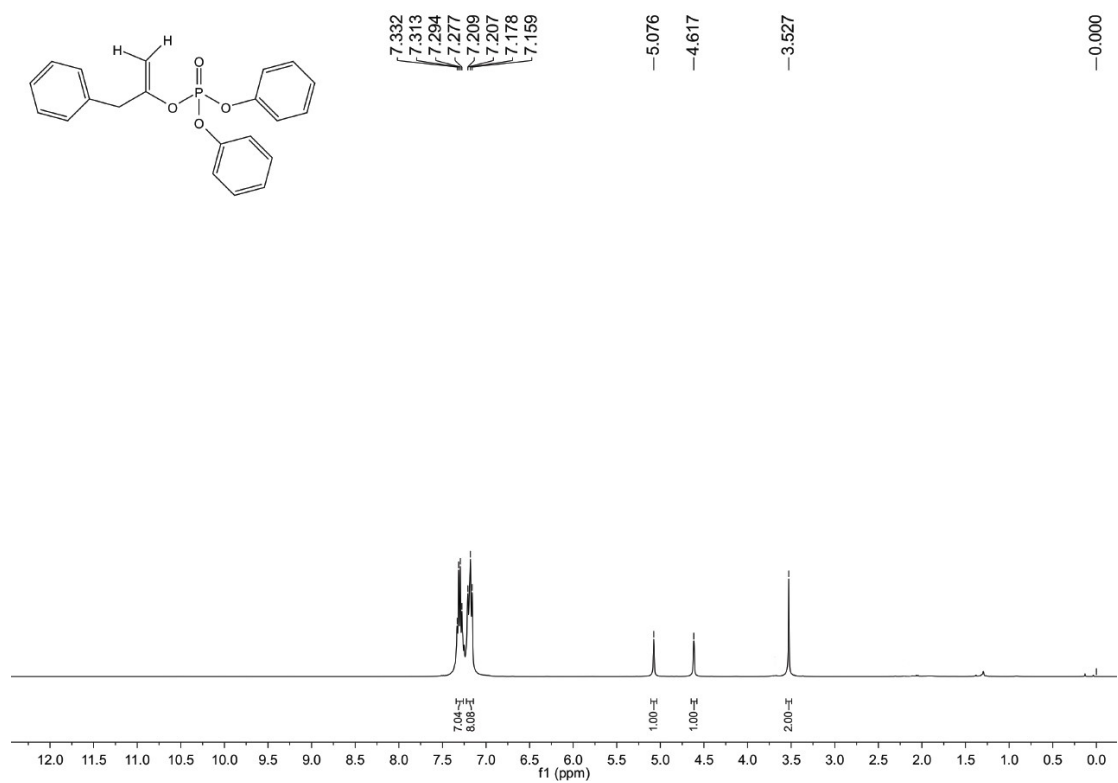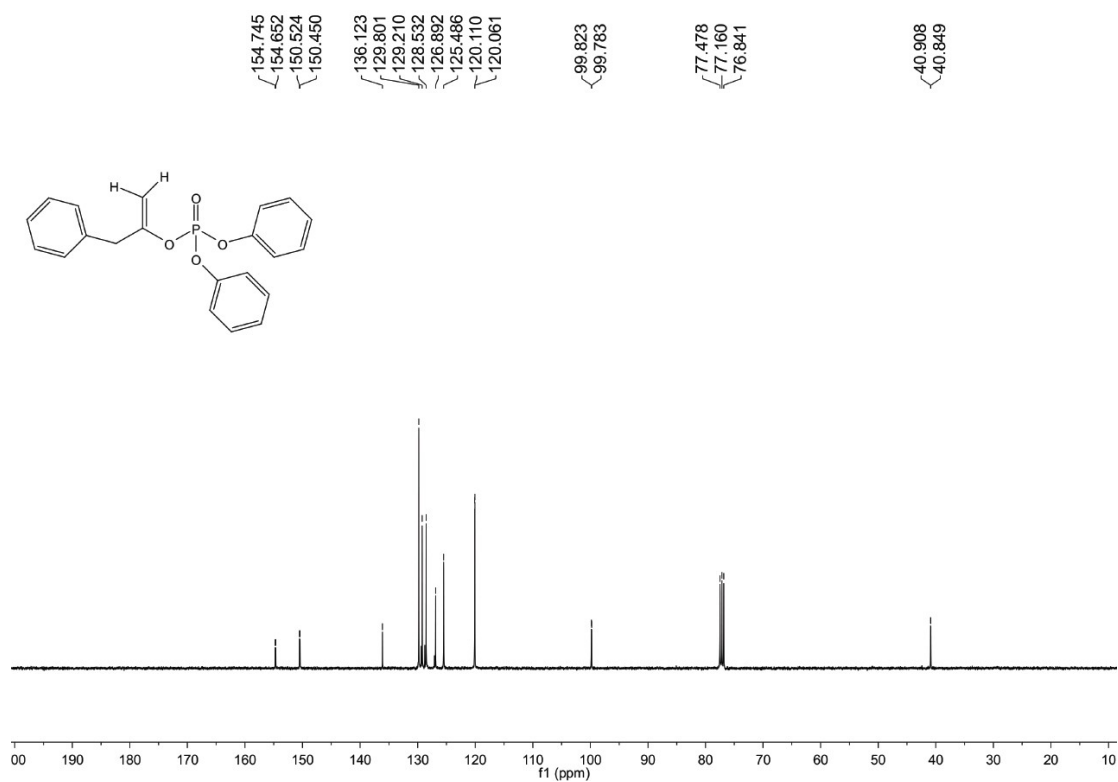

<sup>1</sup>H NMR and <sup>13</sup>C NMR of Compound 2h

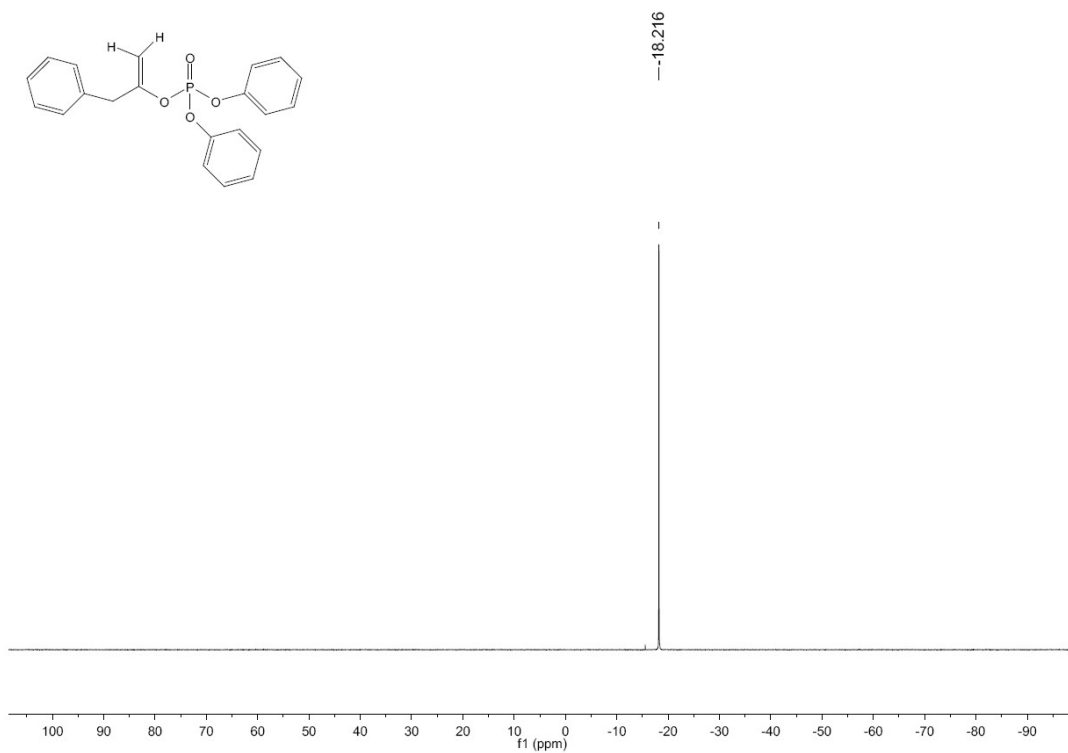

$^{31}\text{P}$  NMR of Compound **2h**

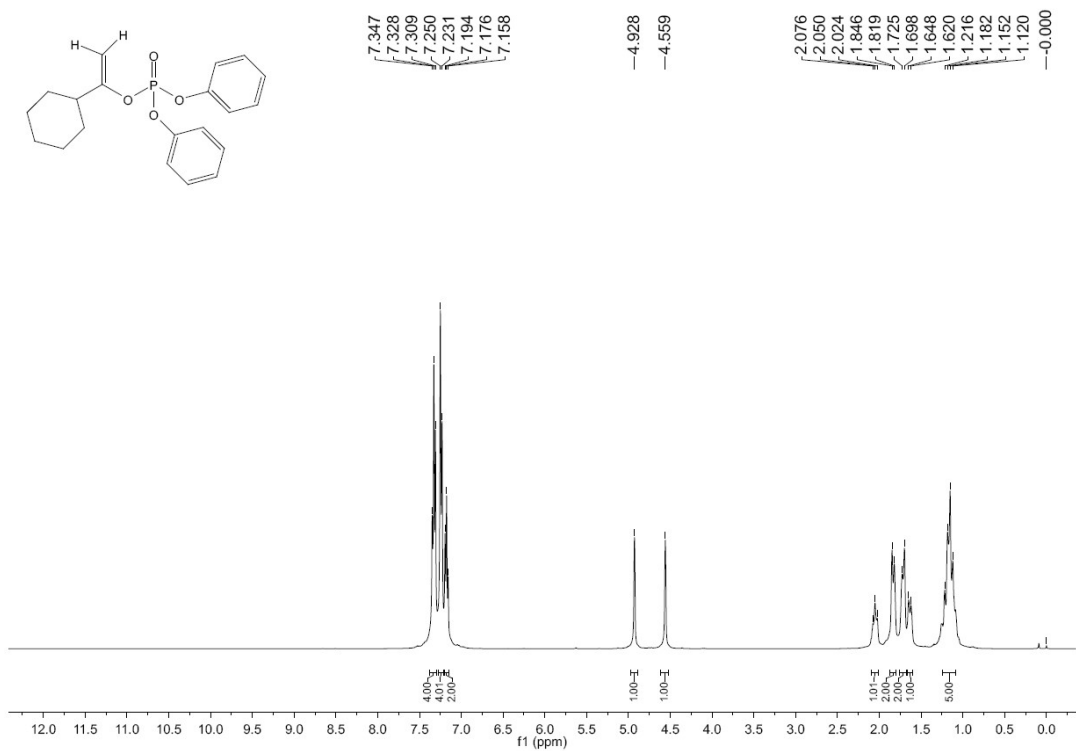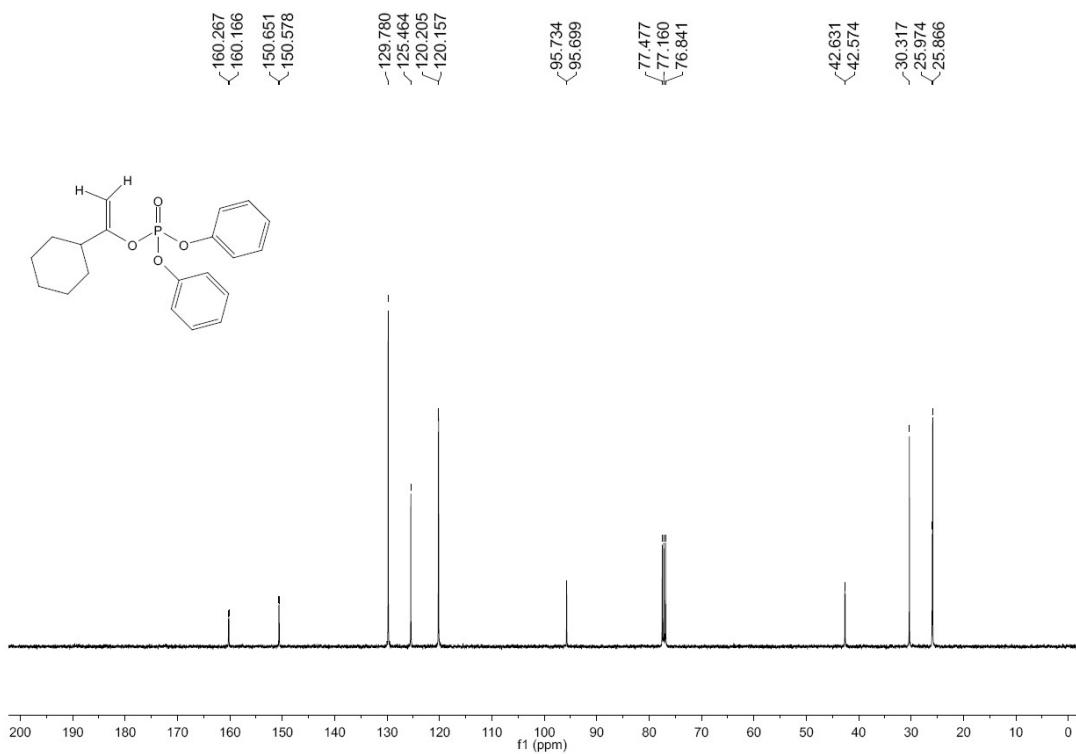

<sup>1</sup>H NMR and <sup>13</sup>C NMR of Compound **2i**

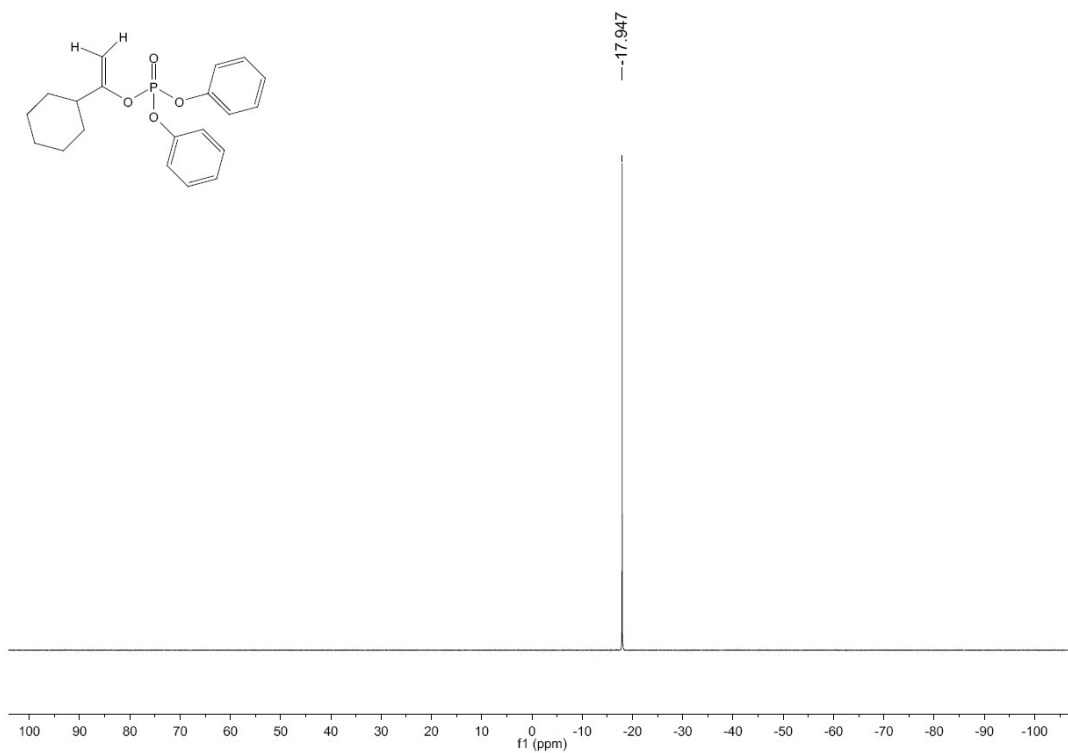

$^{31}\text{P}$  NMR of Compound **2i**

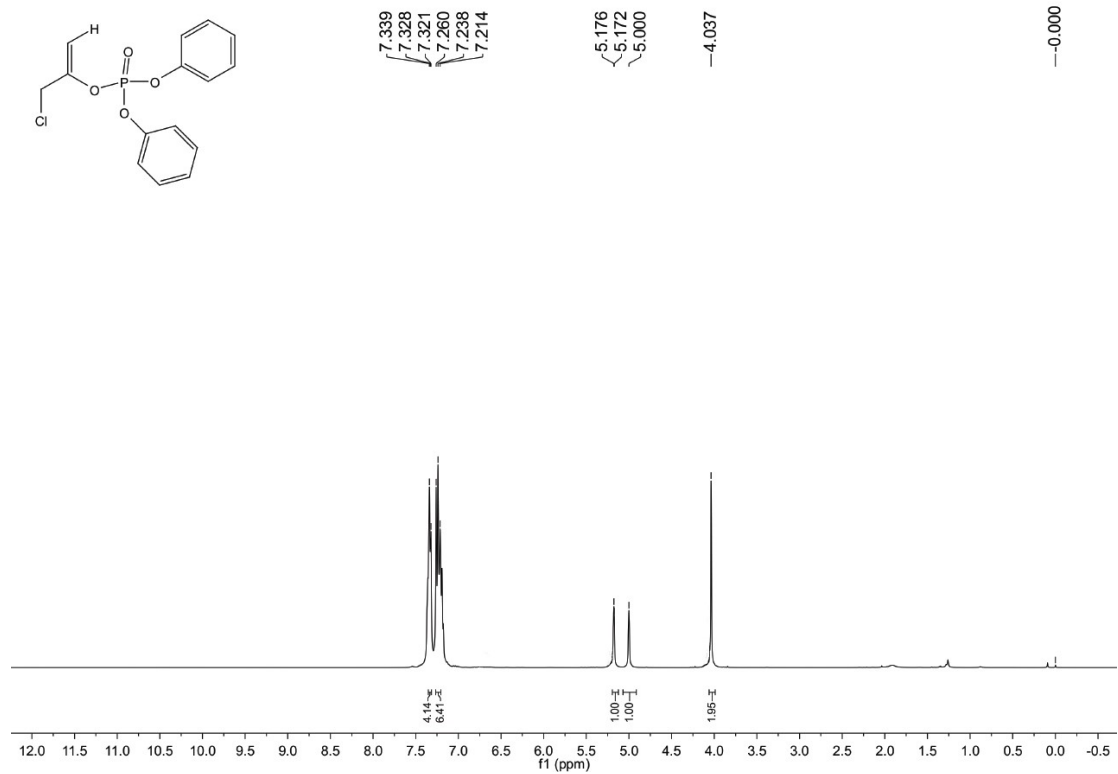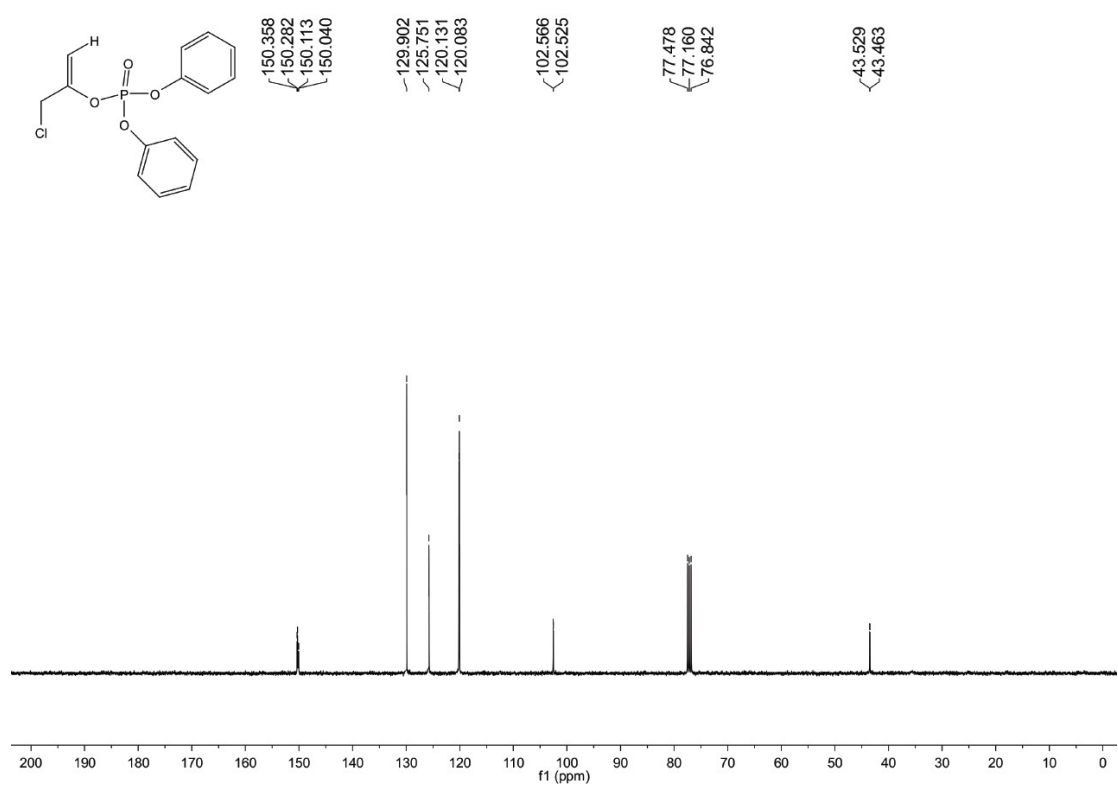

<sup>1</sup>H NMR and <sup>13</sup>C NMR of Compound 2j

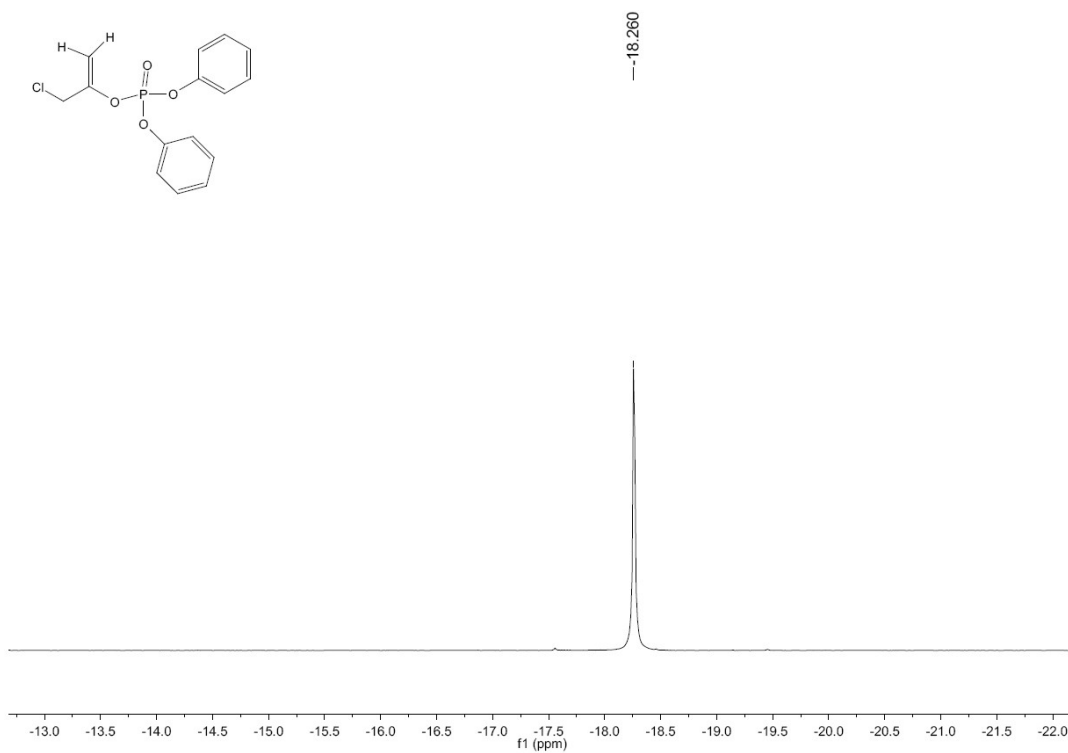

$^{31}\text{P}$  NMR of Compound **2j**

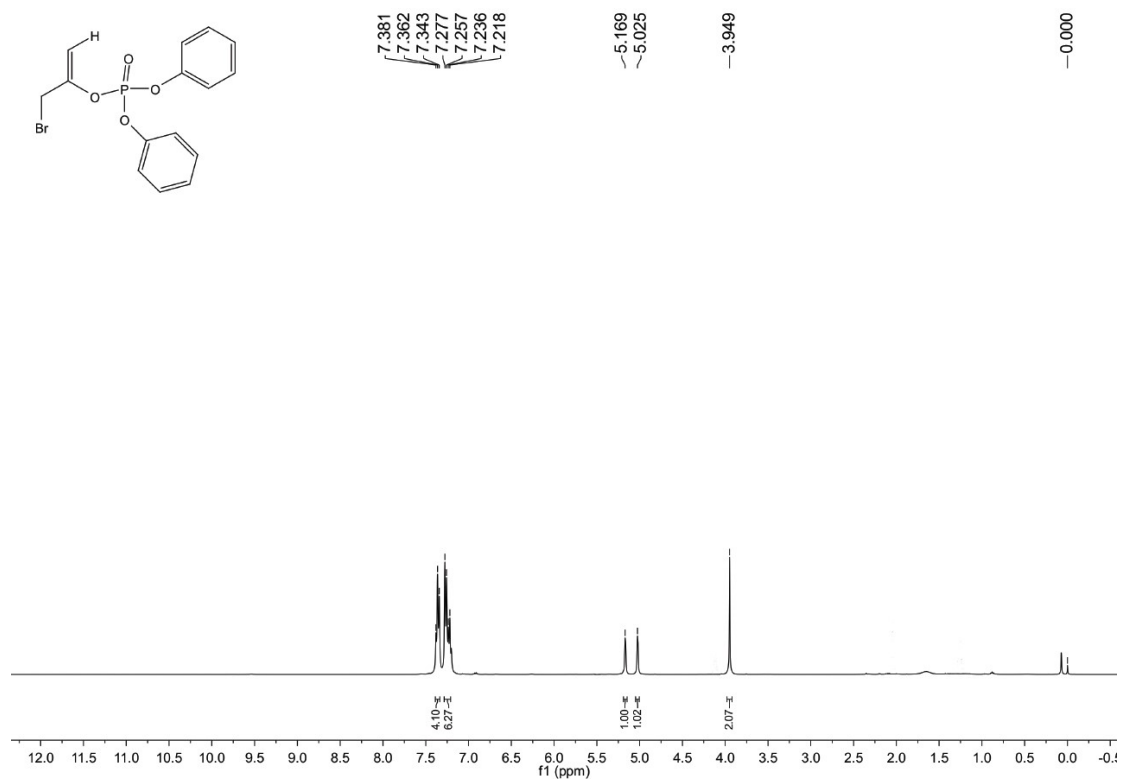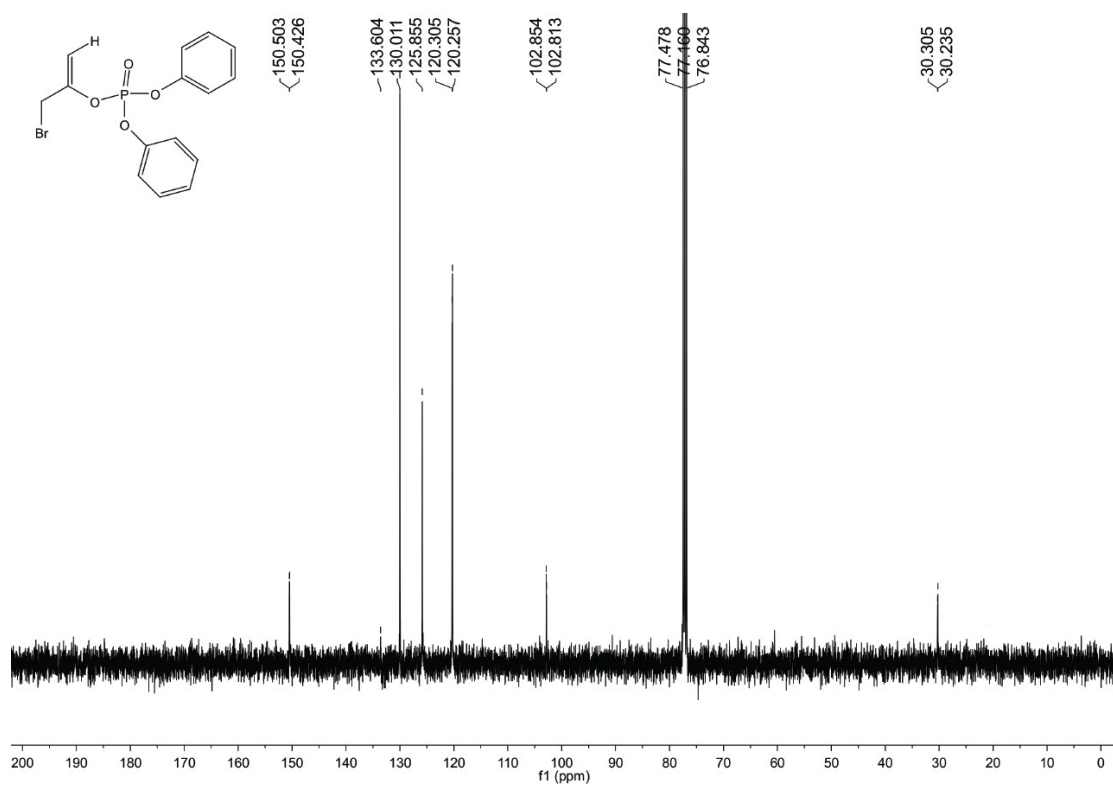

$^1\text{H}$  NMR and  $^{13}\text{C}$  NMR of Compound 2k

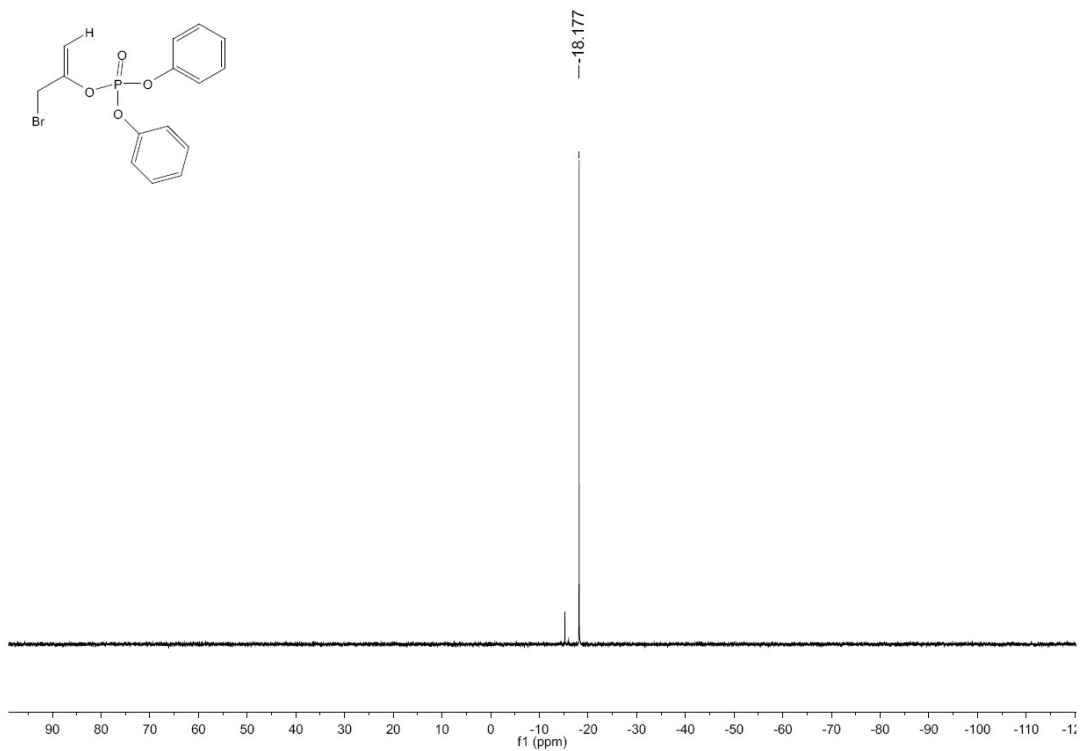

$^{31}\text{P}$  NMR of Compound **2k**

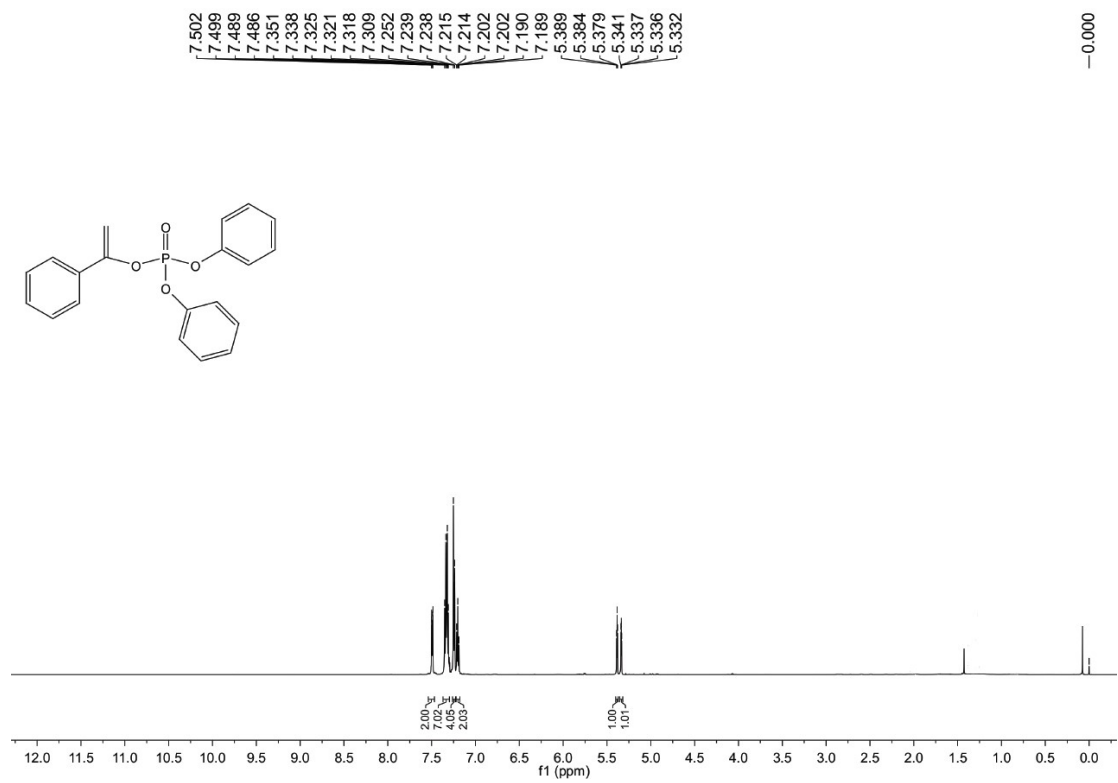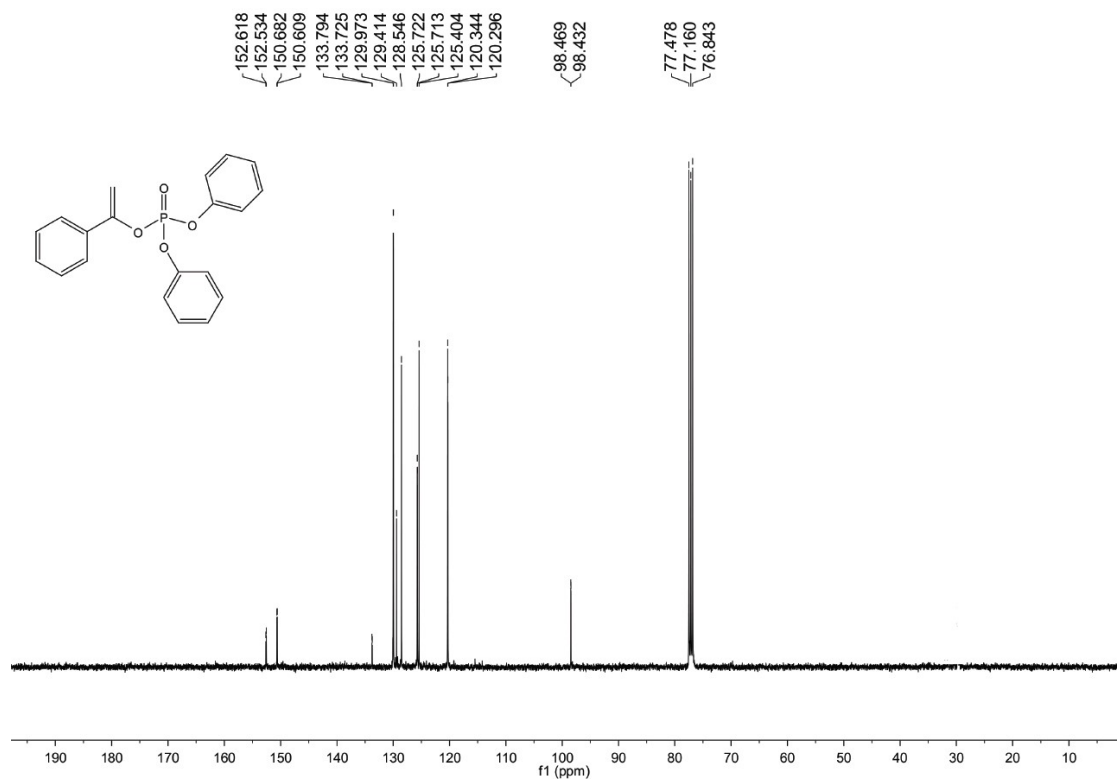

$^1\text{H}$  NMR and  $^{13}\text{C}$  NMR of Compound 2I

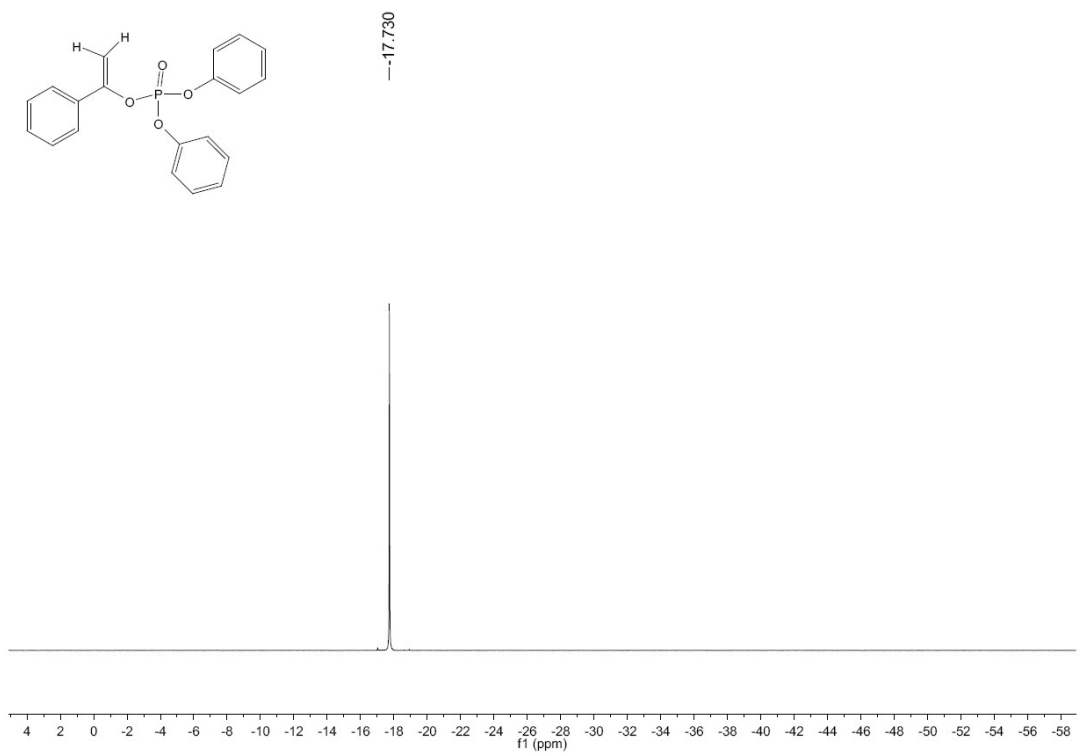

$^{31}\text{P}$  NMR of Compound **21**



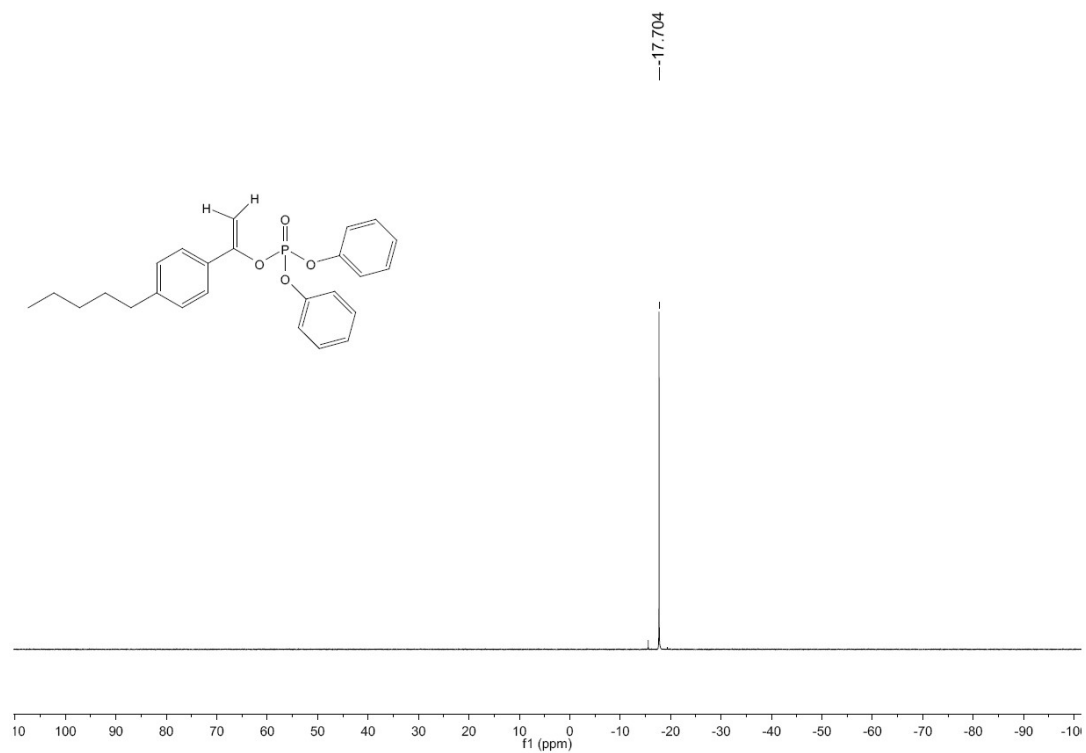

$^{31}\text{P}$  NMR of Compound **2m**

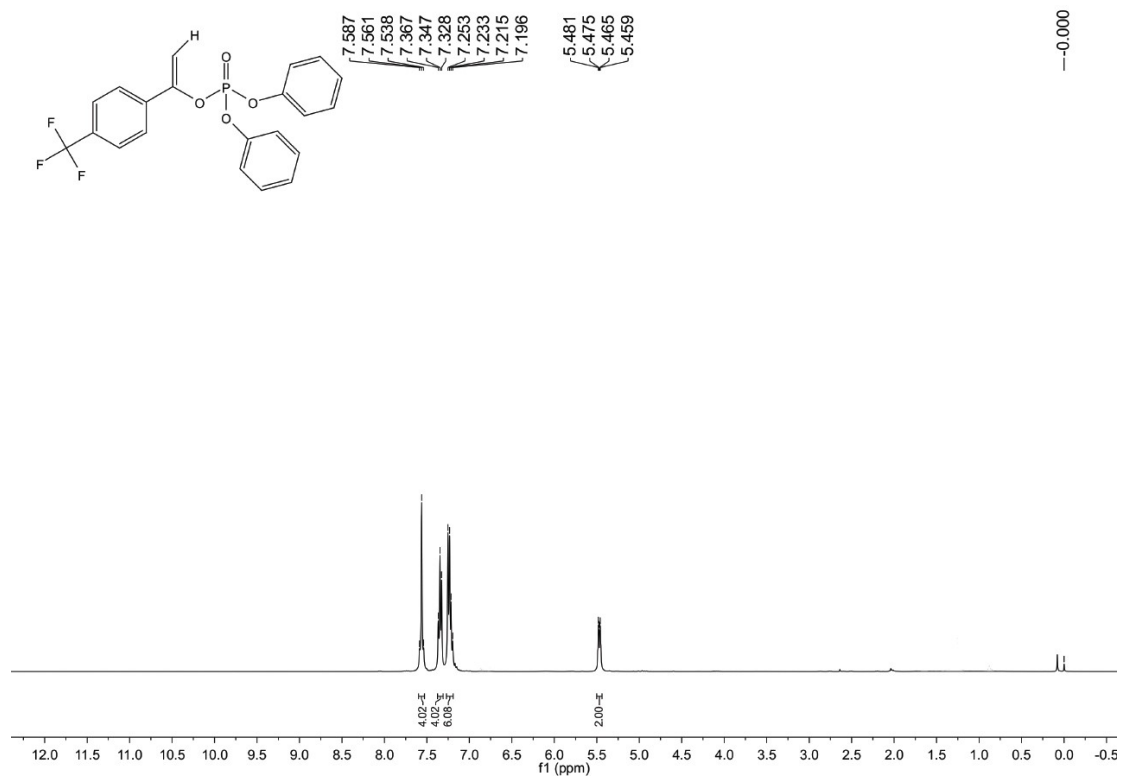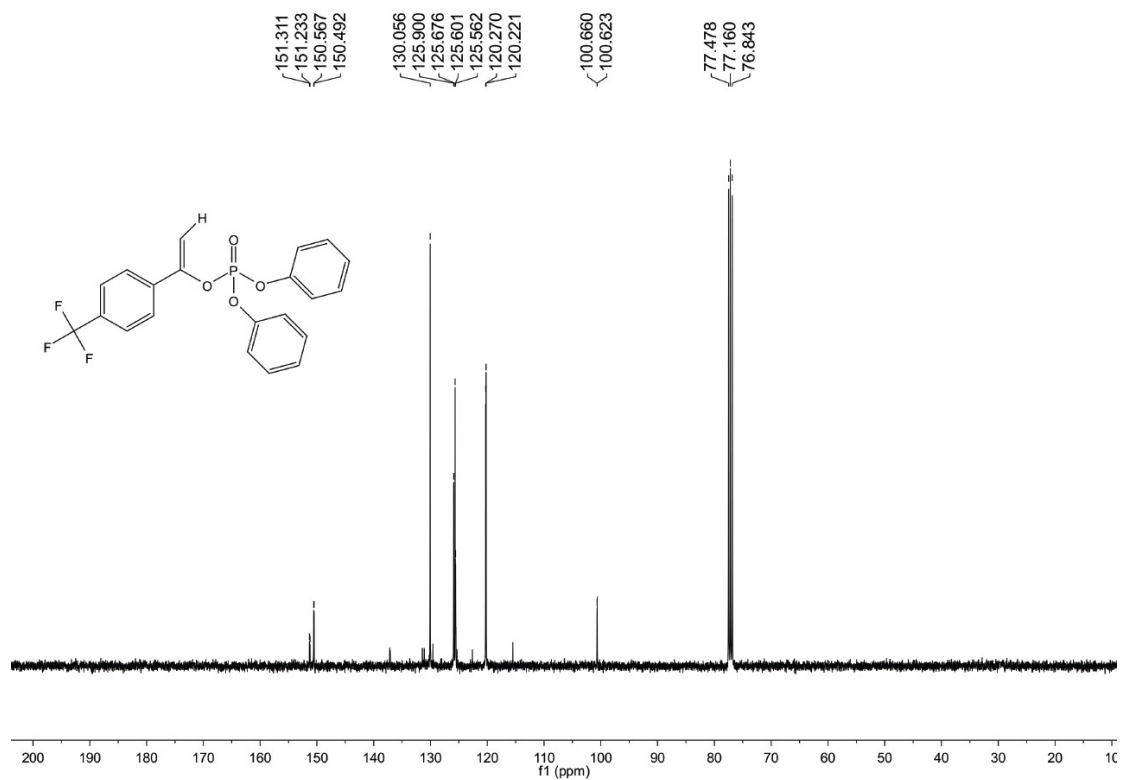

$^1\text{H}$  NMR and  $^{13}\text{C}$  NMR of Compound **2n**

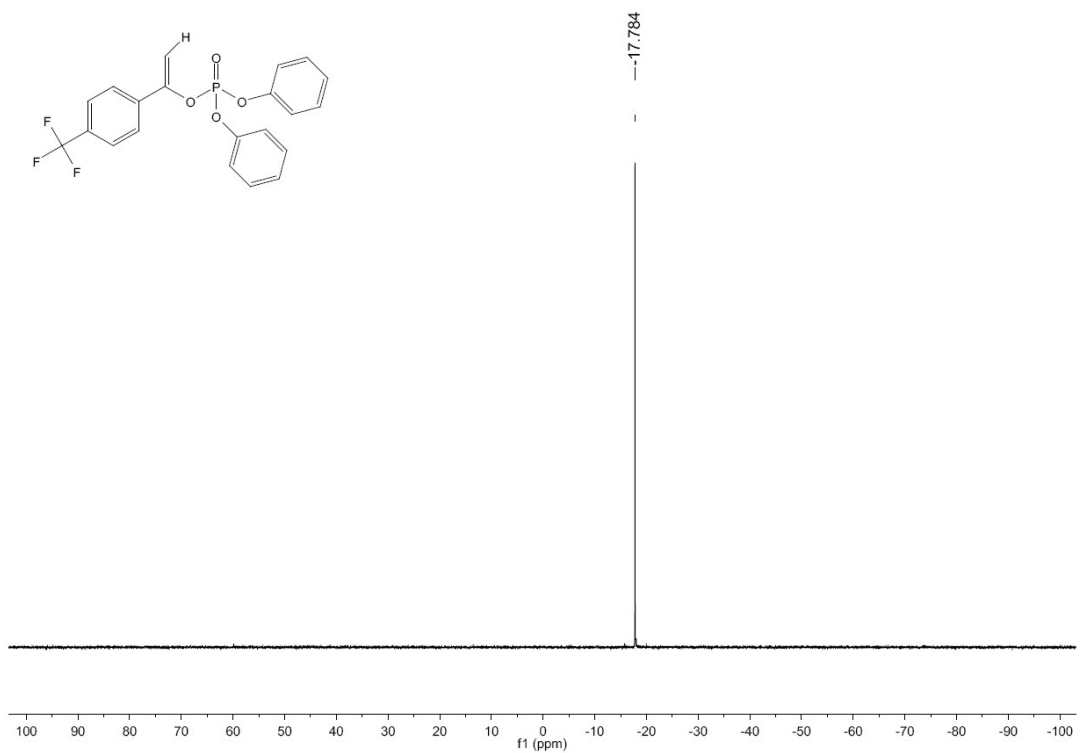

<sup>31</sup>P NMR of Compound 2n

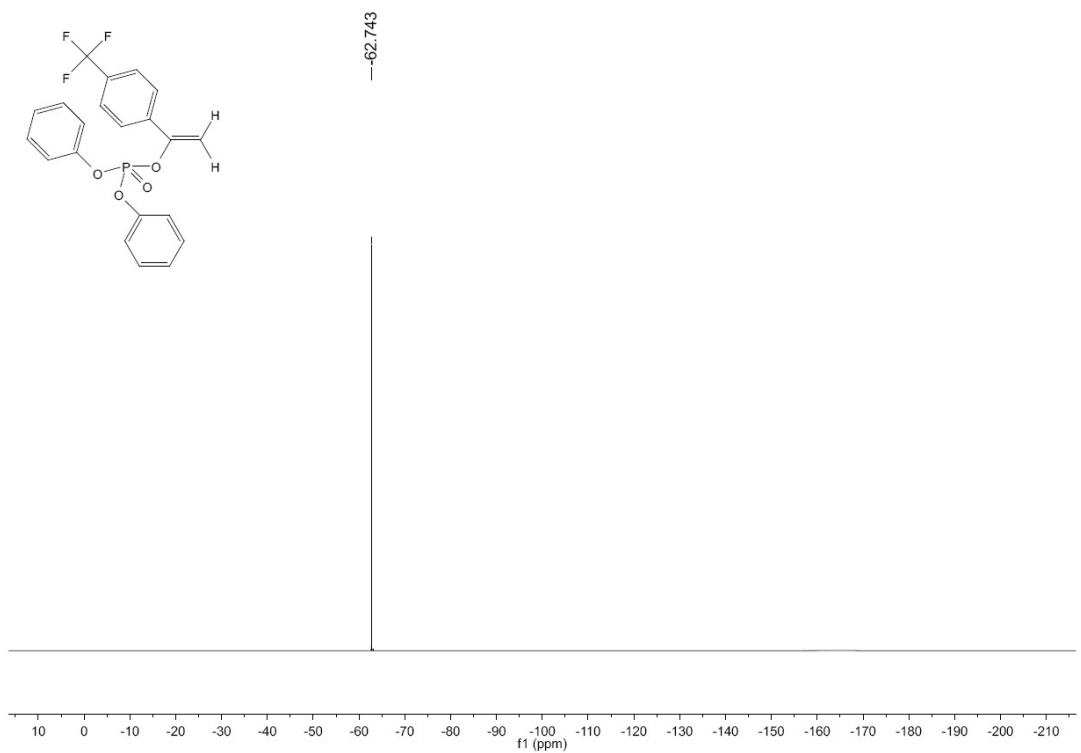

<sup>19</sup>F NMR of Compound 2n

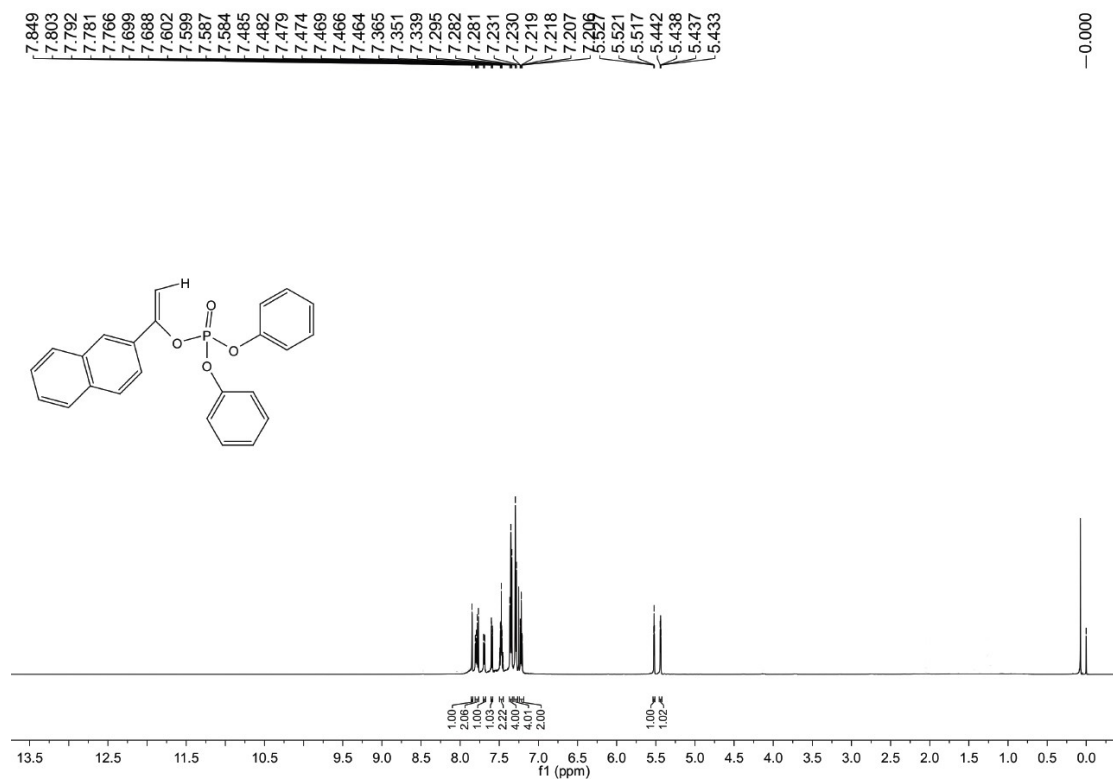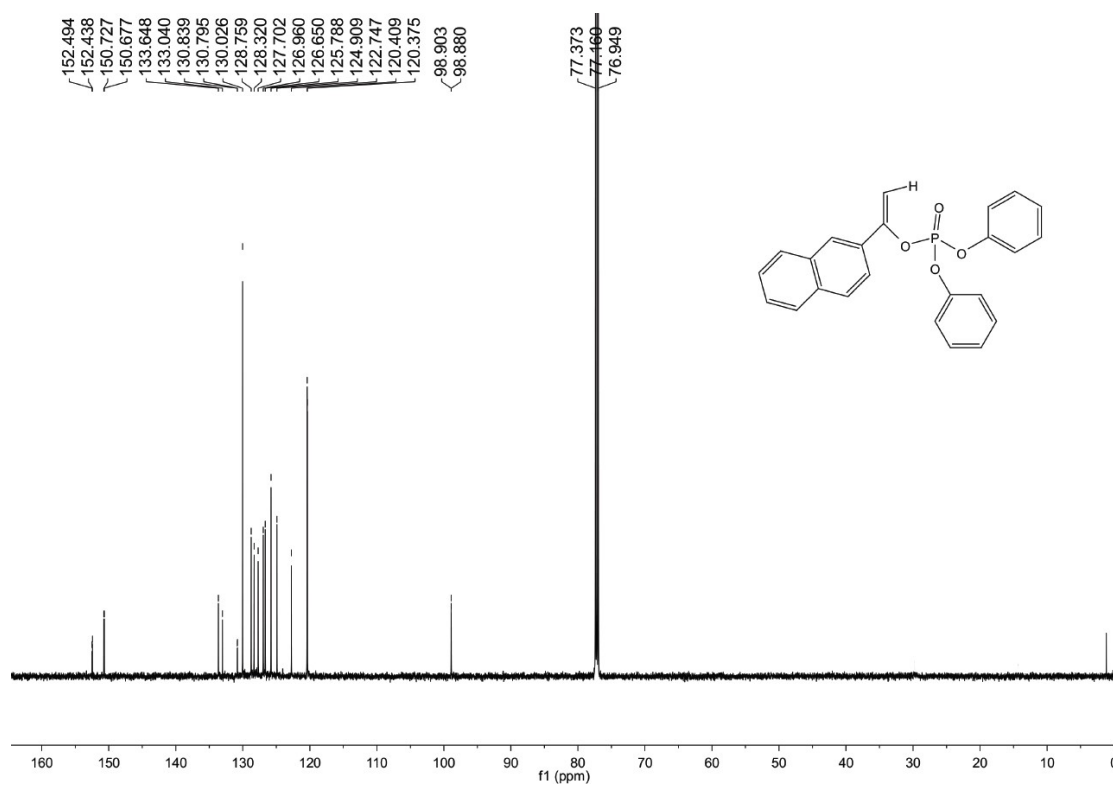

<sup>1</sup>H NMR and <sup>13</sup>C NMR of Compound 20

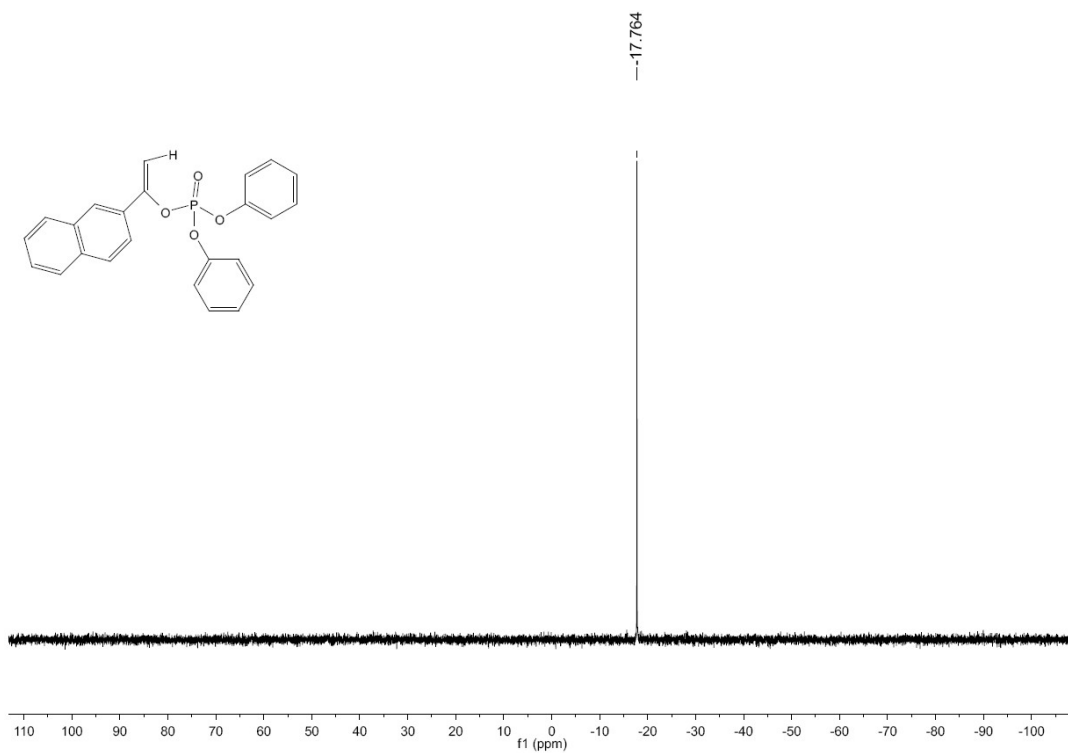

$^{31}\text{P}$  NMR of Compound **2o**



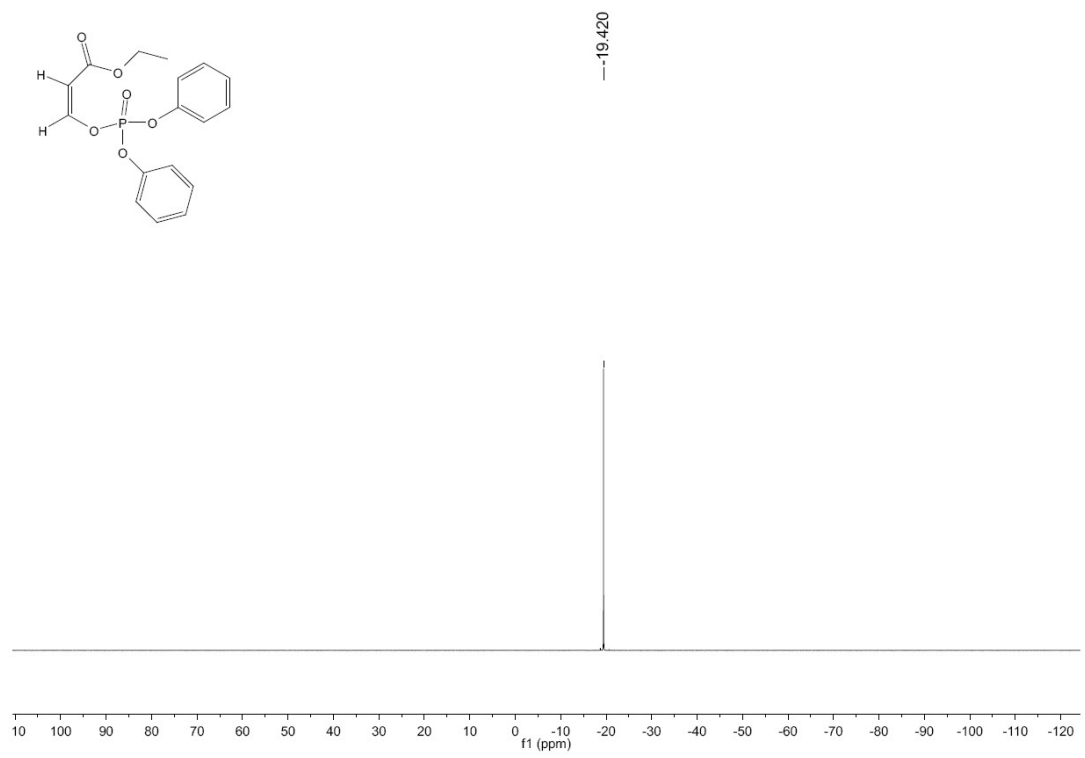

$^{31}\text{P}$  NMR of Compound **2p**

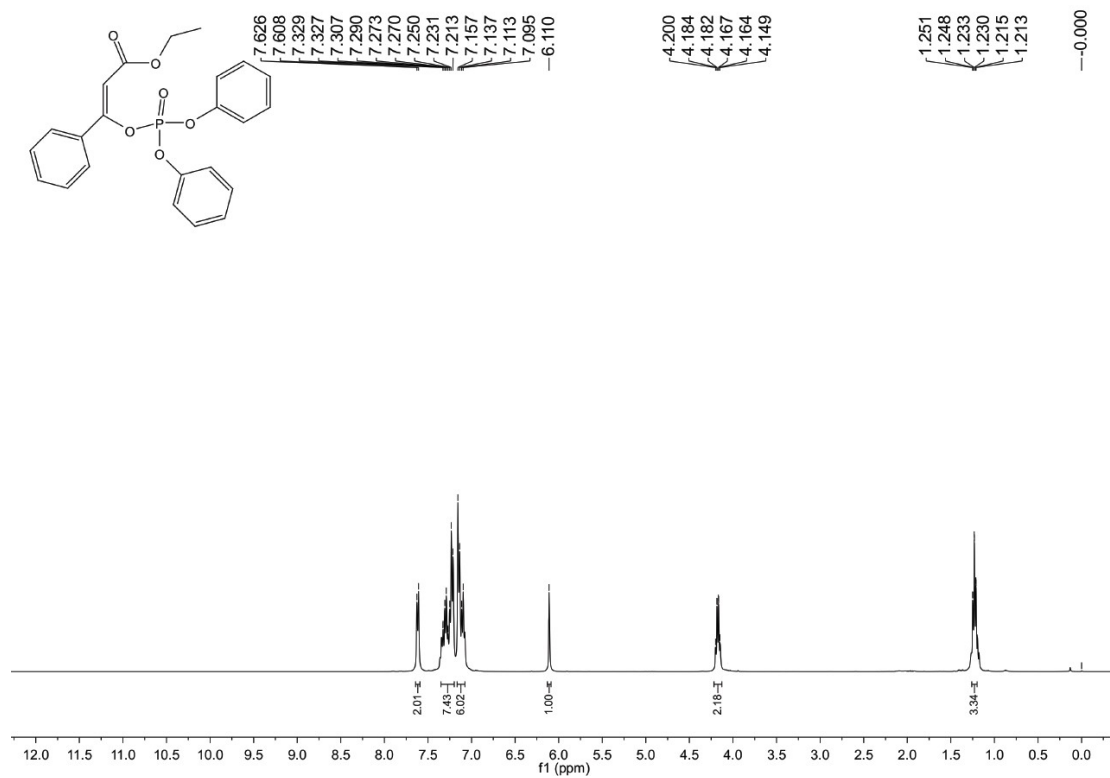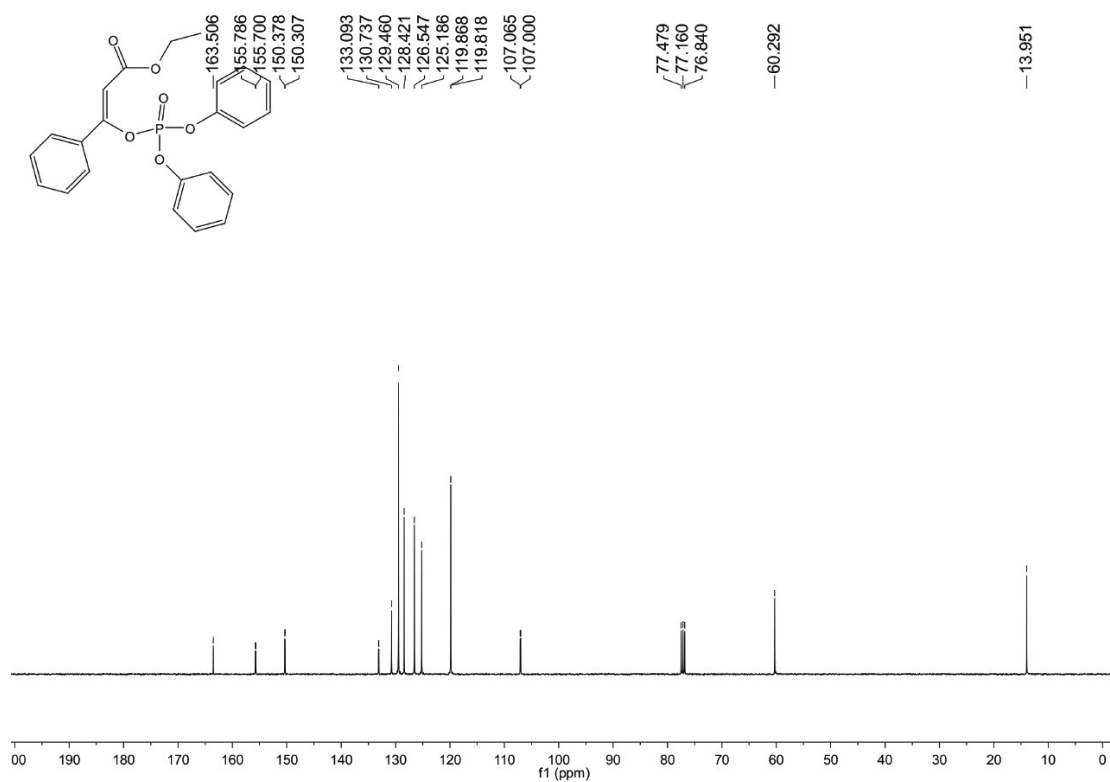

<sup>1</sup>H NMR and <sup>13</sup>C NMR of Compound 2q

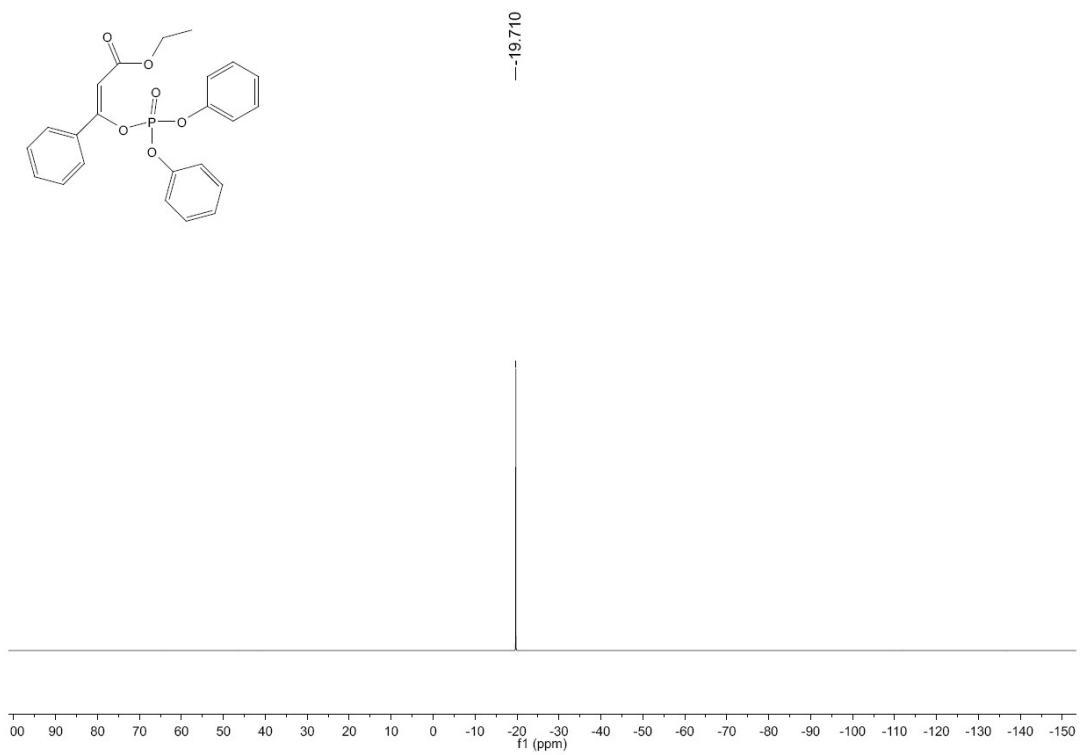

<sup>31</sup>P NMR of Compound 2q

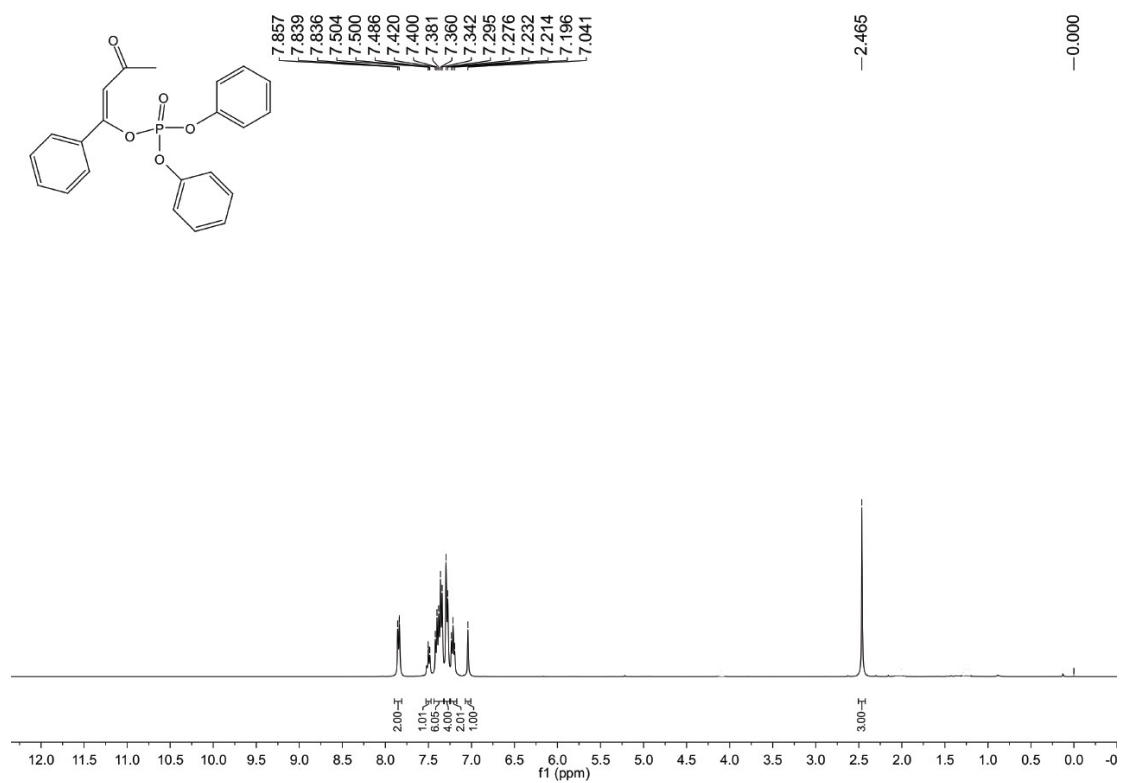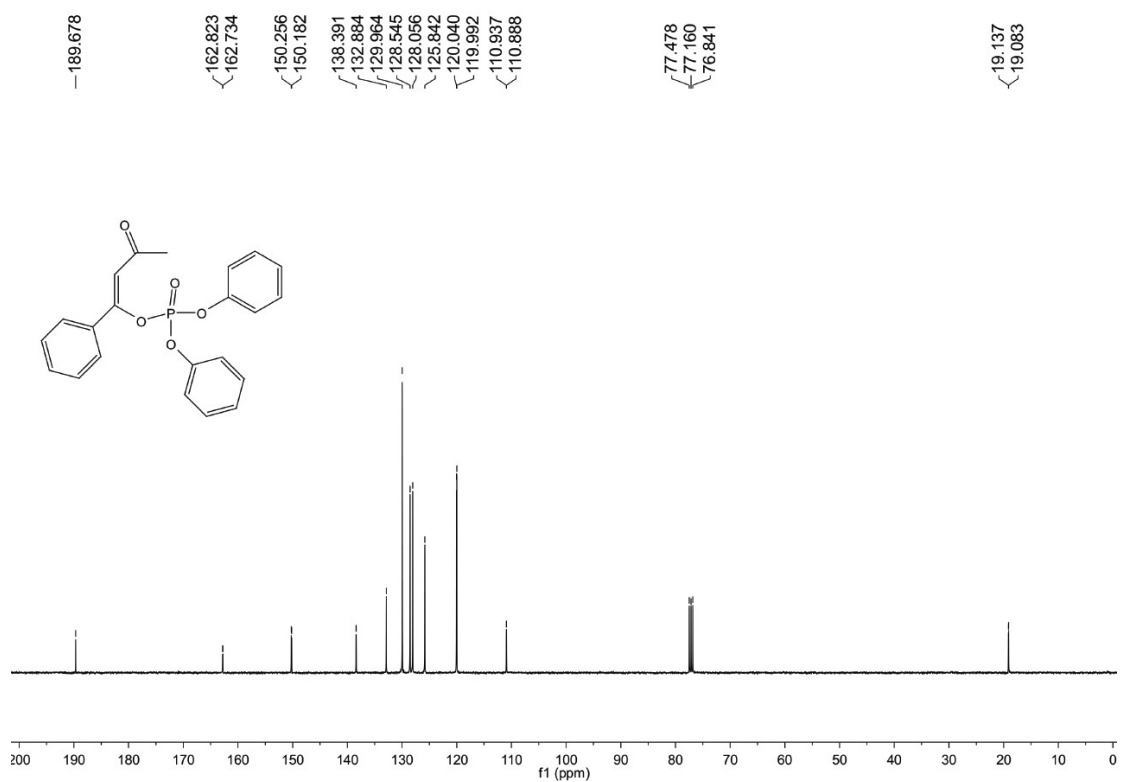

<sup>1</sup>H NMR and <sup>13</sup>C NMR of Compound 2r



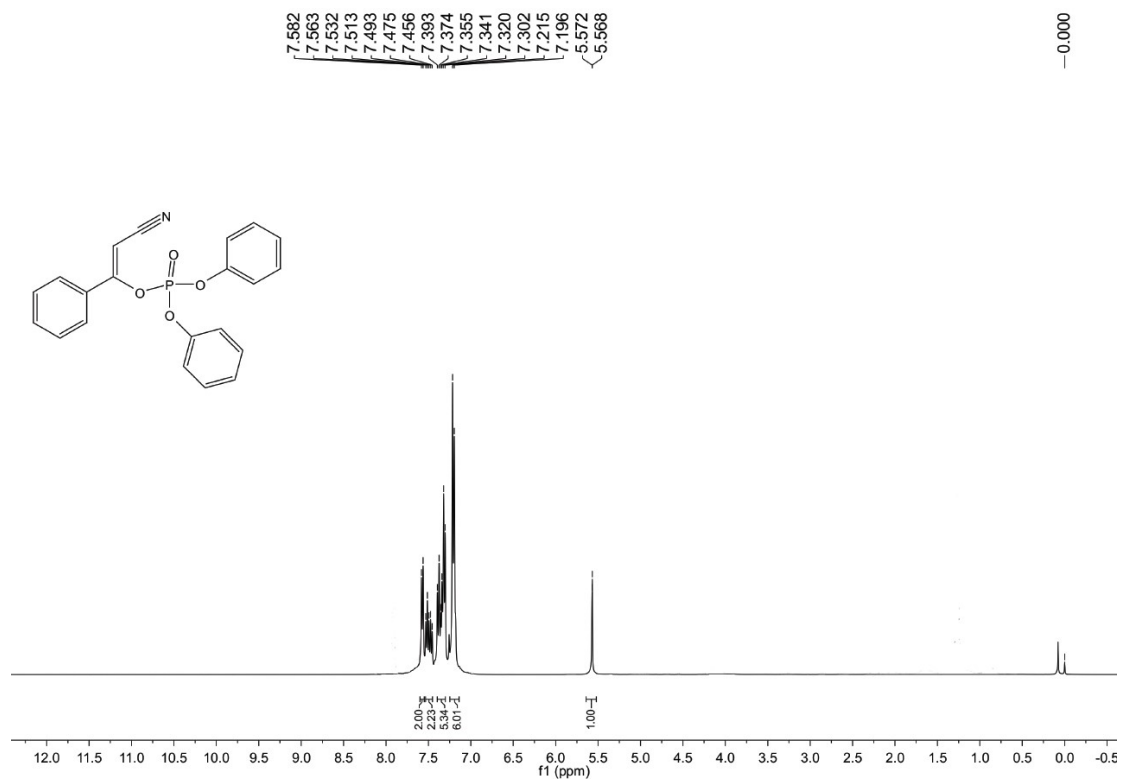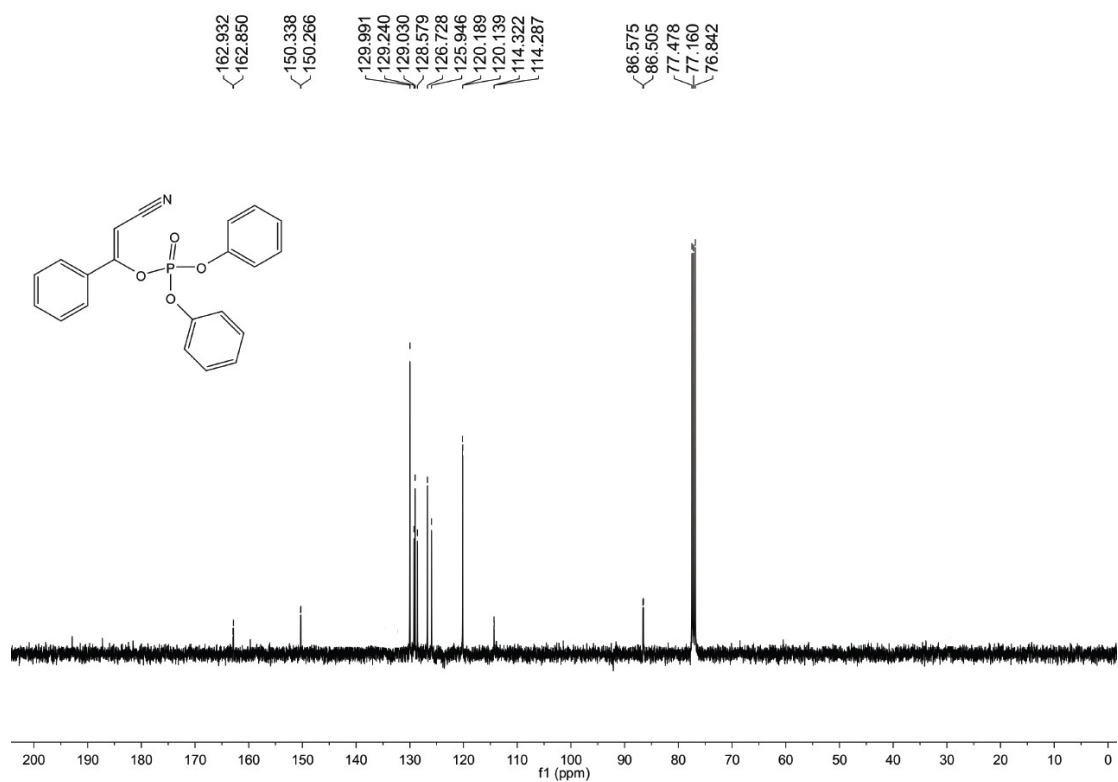

$^1\text{H}$  NMR and  $^{13}\text{C}$  NMR of Compound **2s**

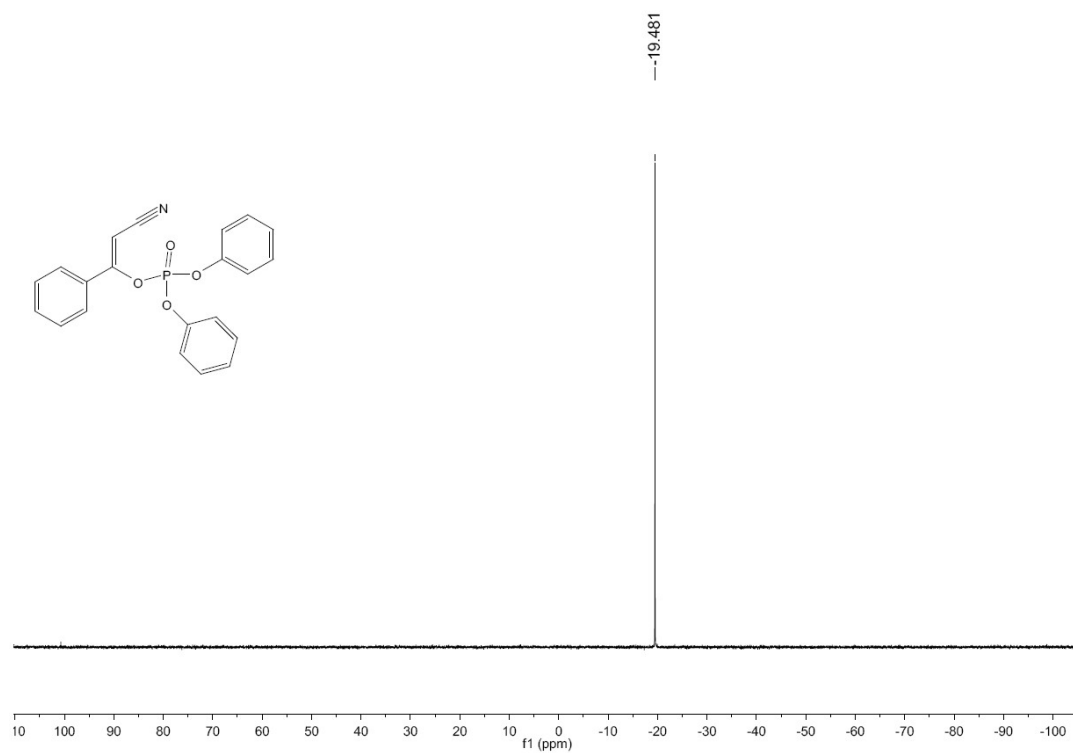

$^{31}\text{P}$  NMR of Compound 2s

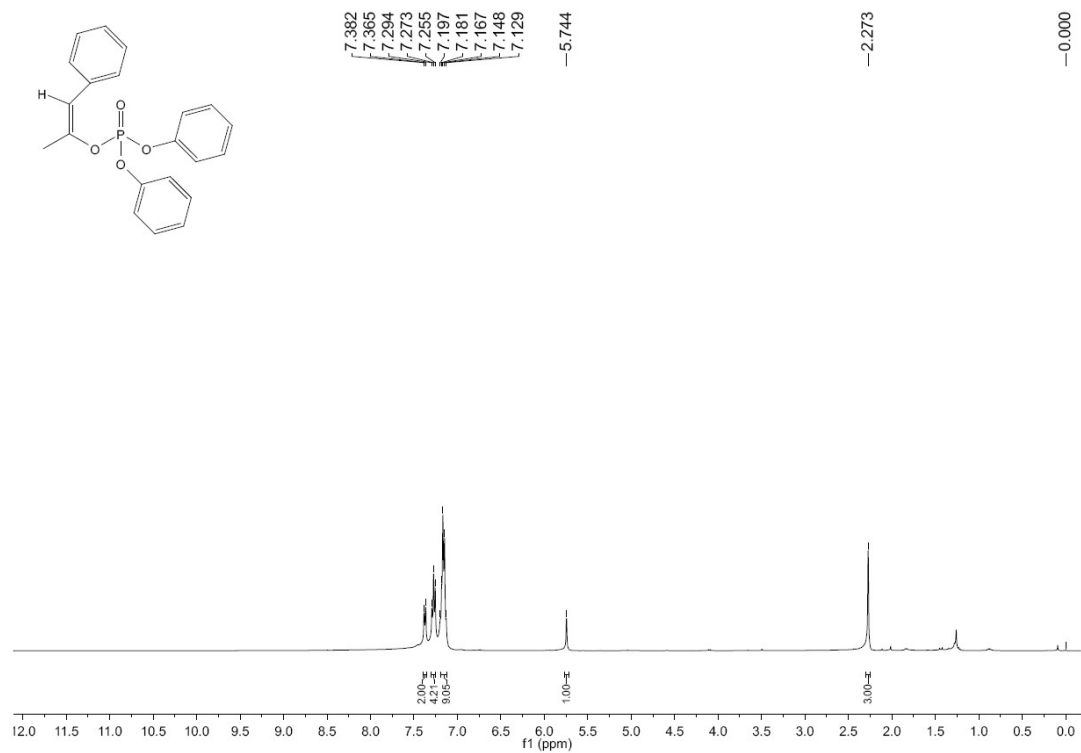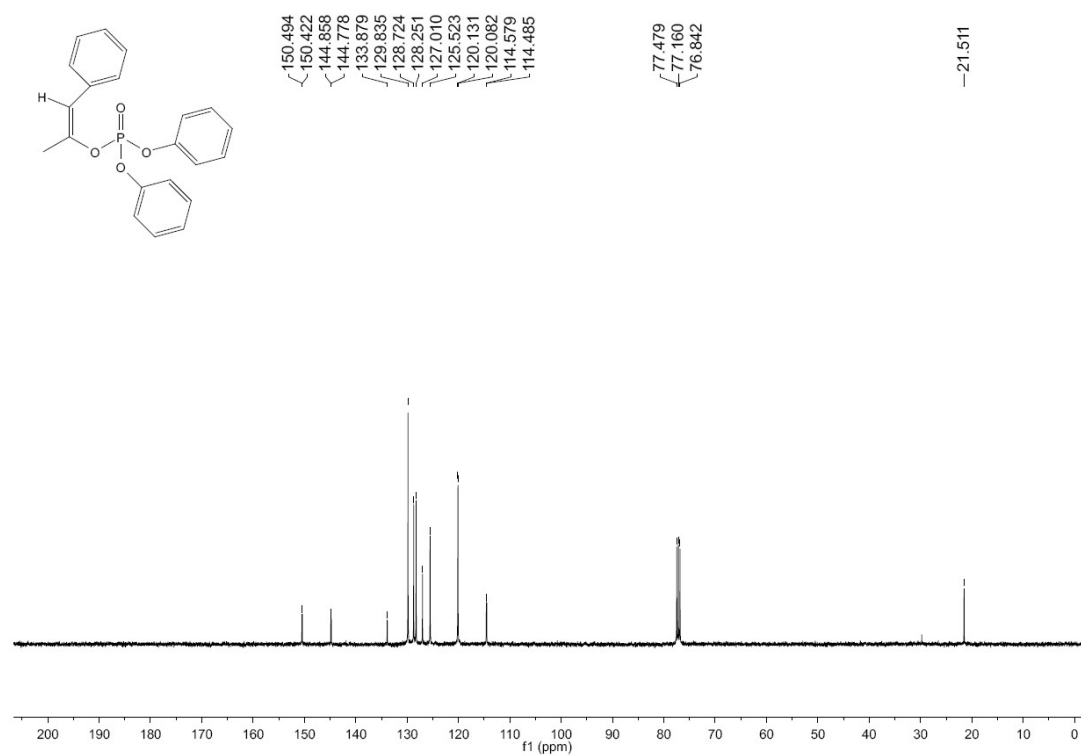

<sup>1</sup>H NMR and <sup>13</sup>C NMR of Compound 2t

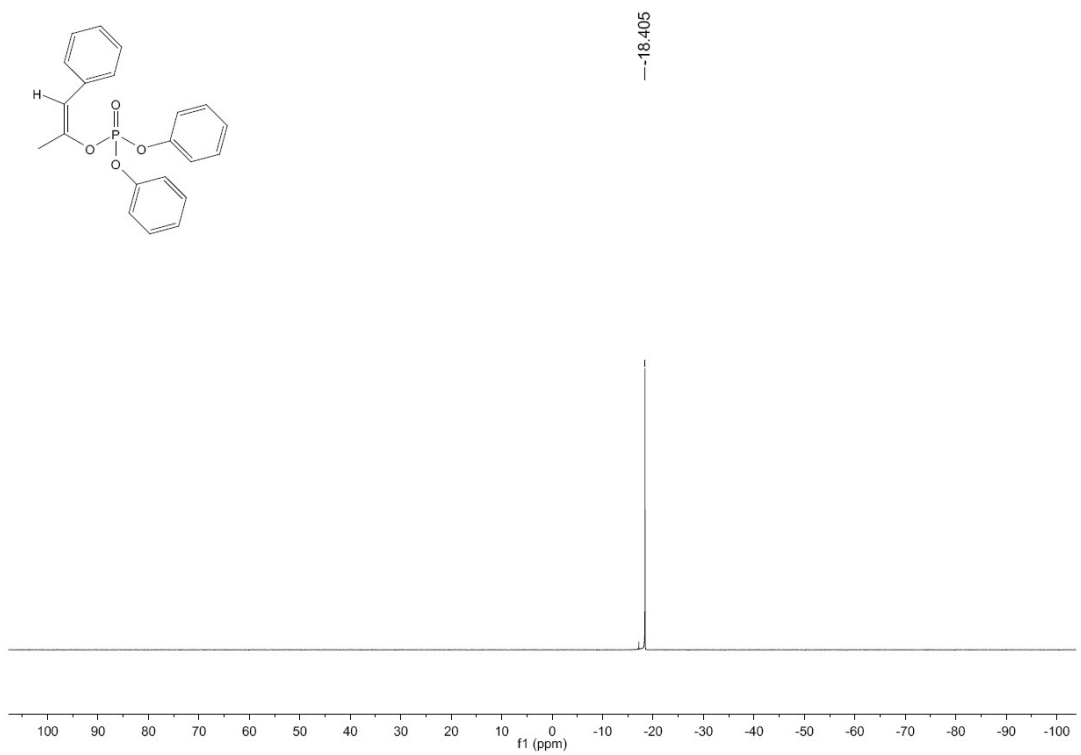

$^{31}\text{P}$  NMR of Compound **2t**

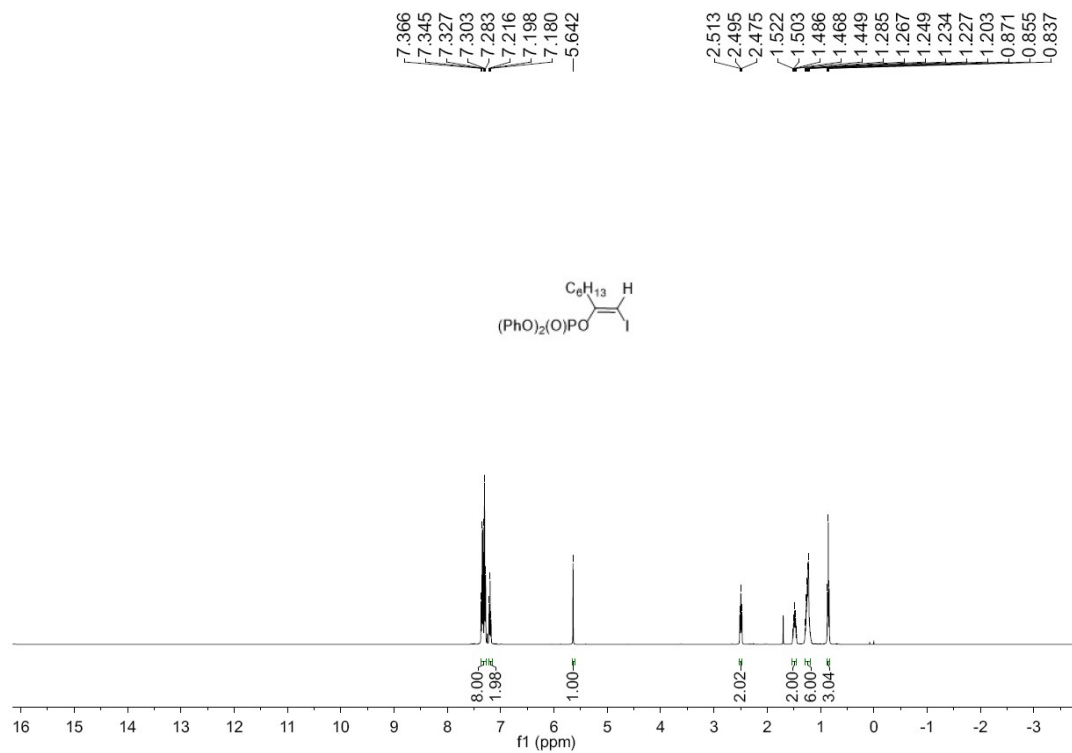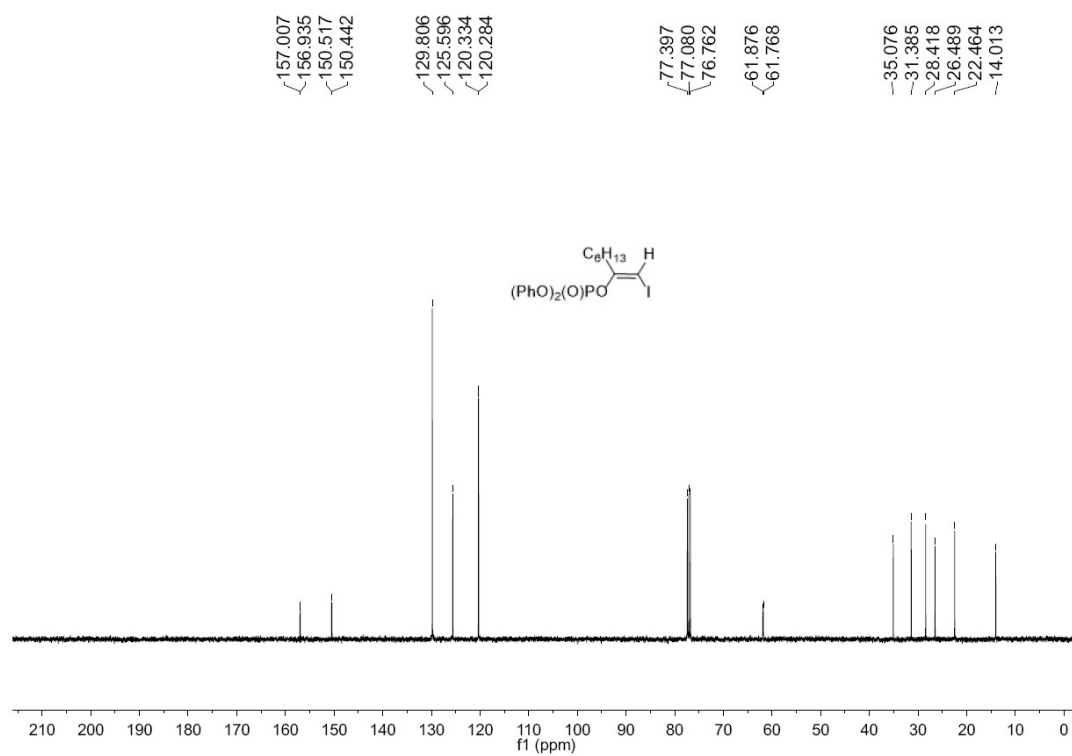

<sup>1</sup>H NMR and <sup>13</sup>C NMR of Compound 4a

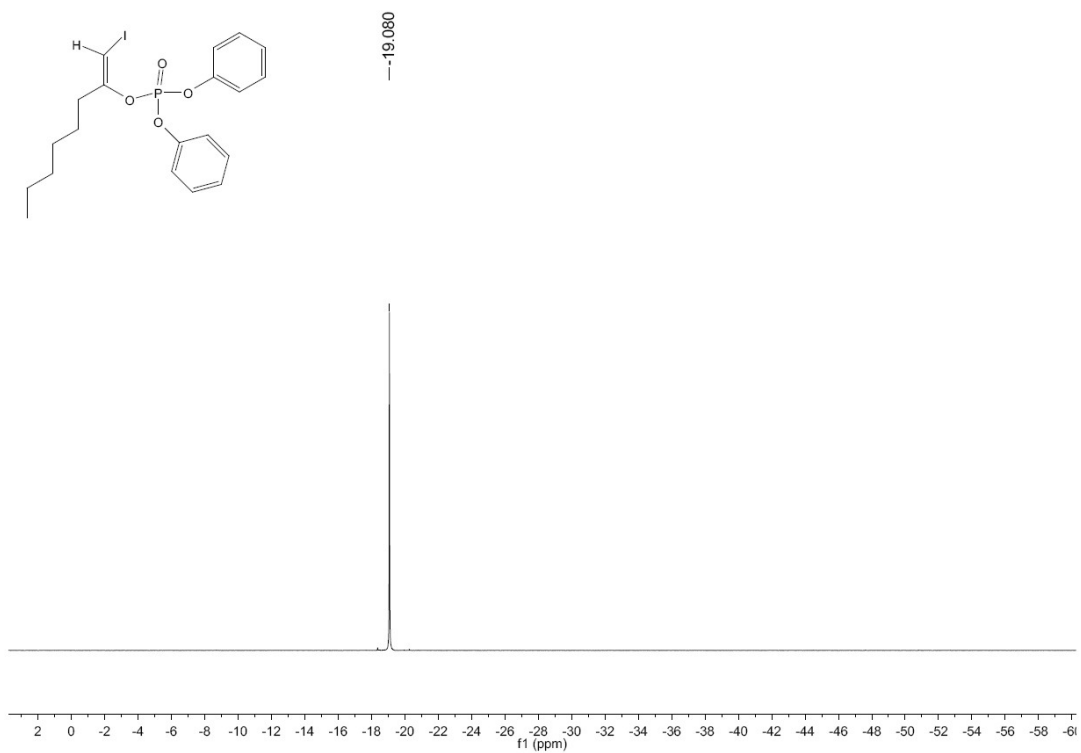

$^{31}\text{P}$  NMR of Compound **4a**

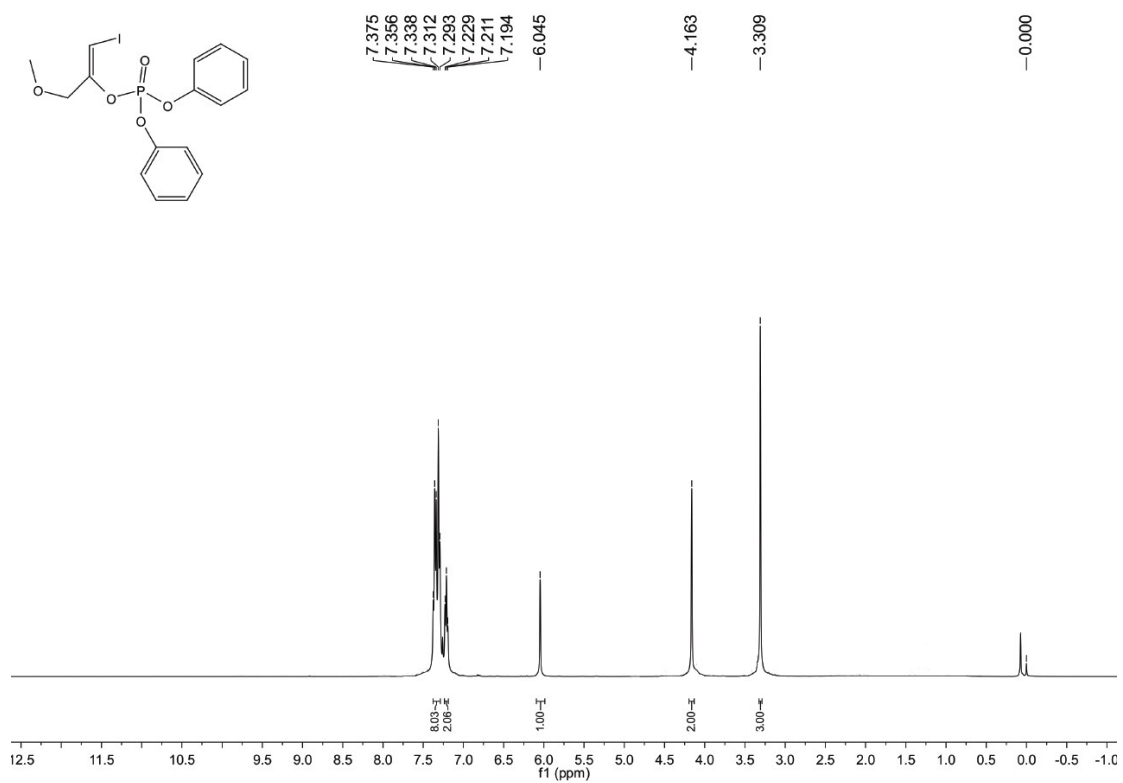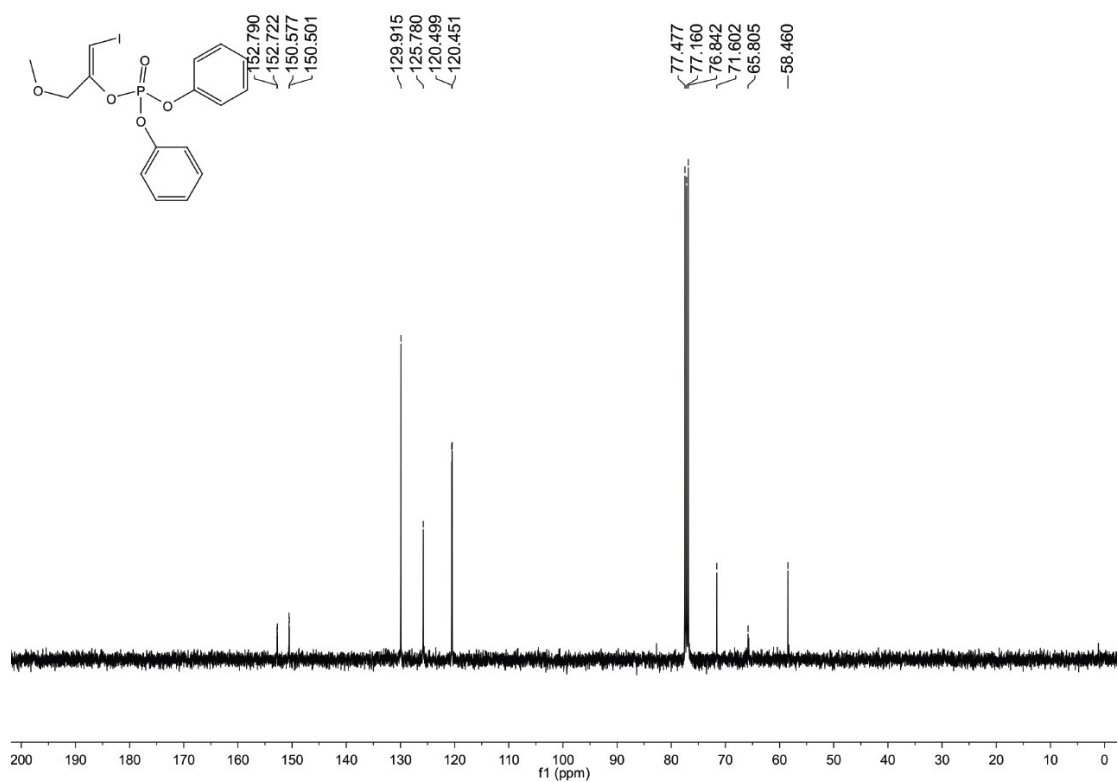

$^1\text{H}$  NMR and  $^{13}\text{C}$  NMR of Compound **4b**

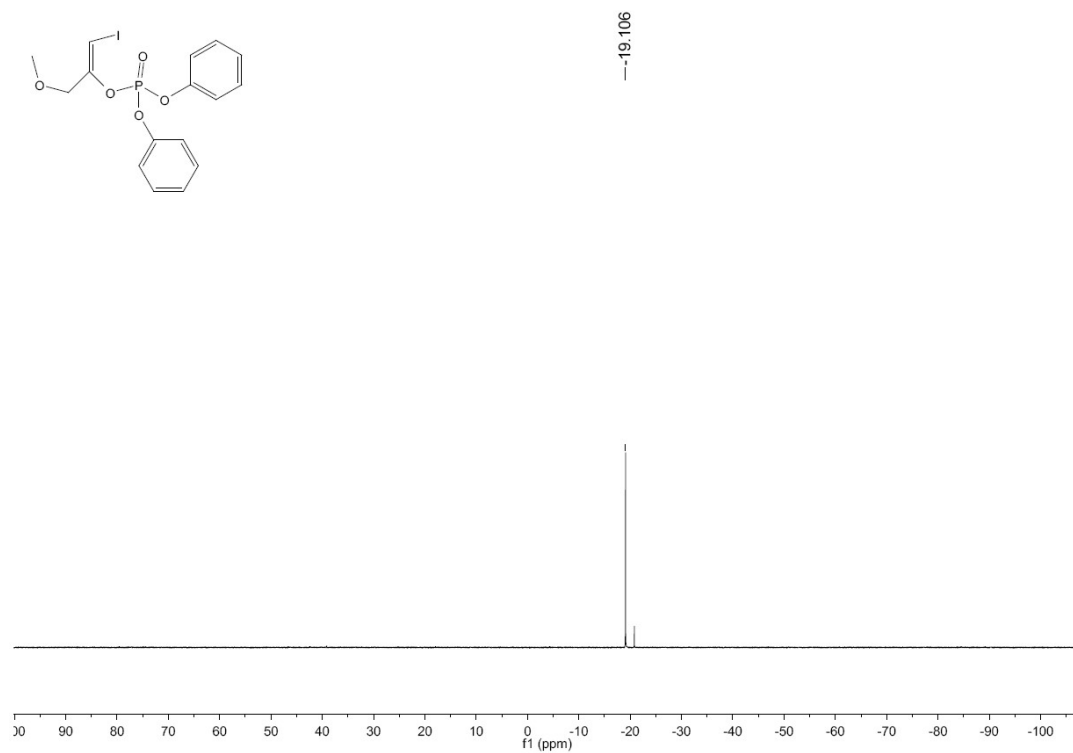

$^{31}\text{P}$  NMR of Compound **4b**

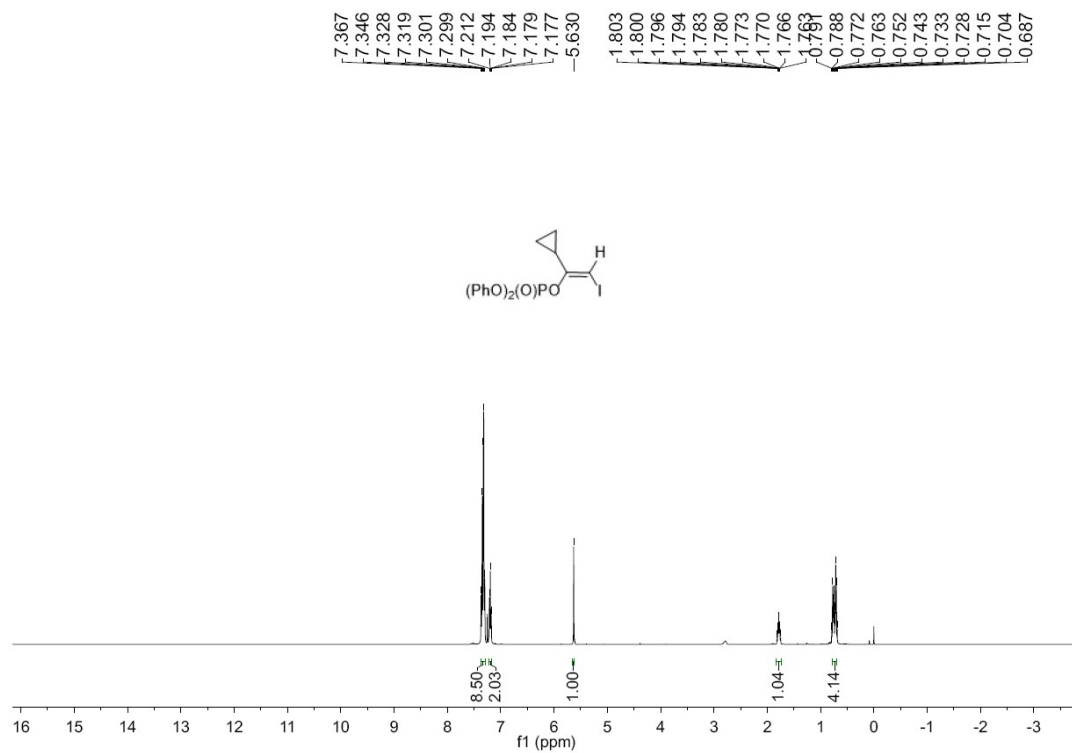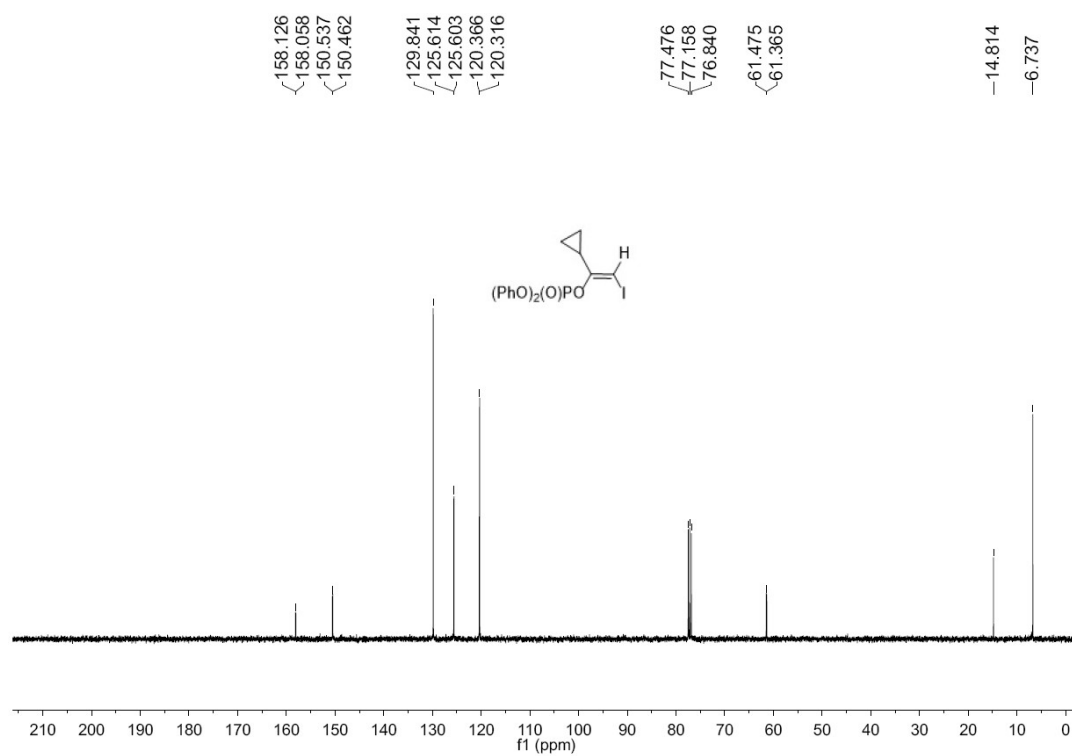

$^1\text{H}$  NMR and  $^{13}\text{C}$  NMR of Compound **4c**

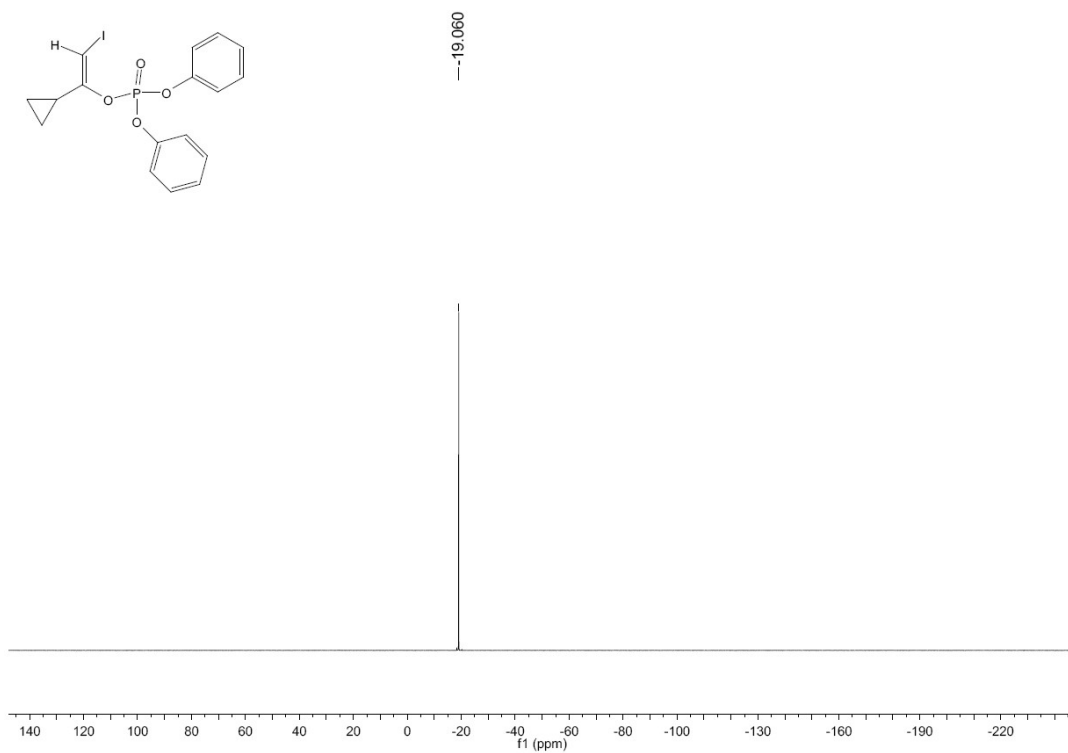

$^{31}\text{P}$  NMR of Compound **4c**

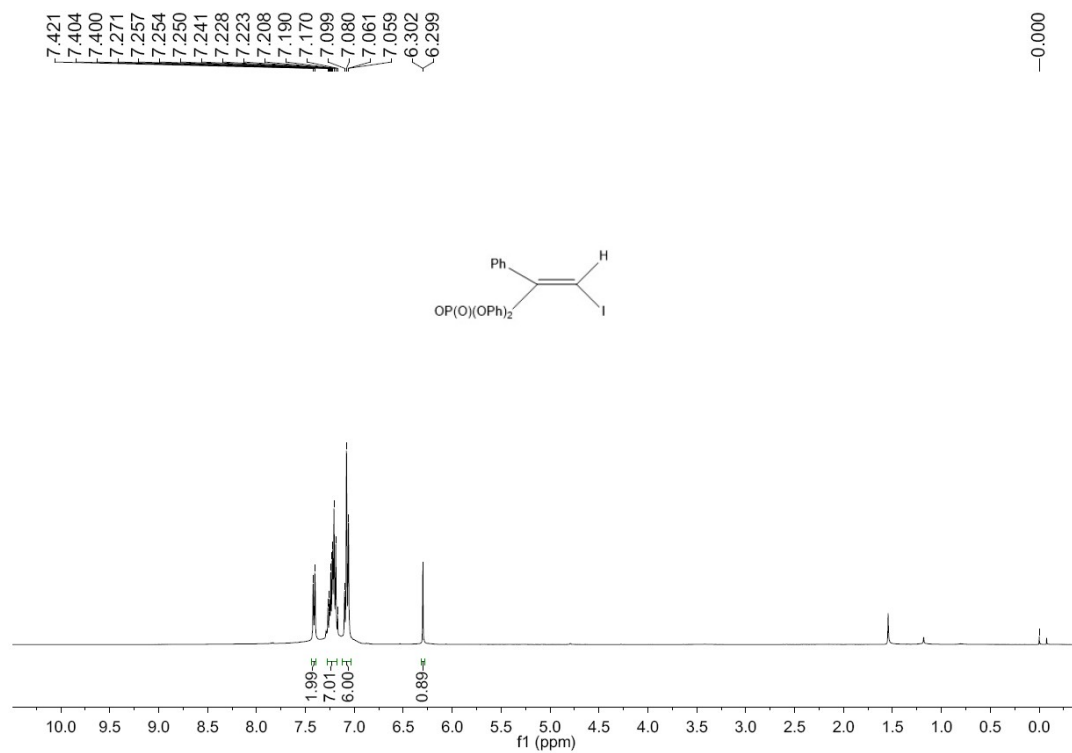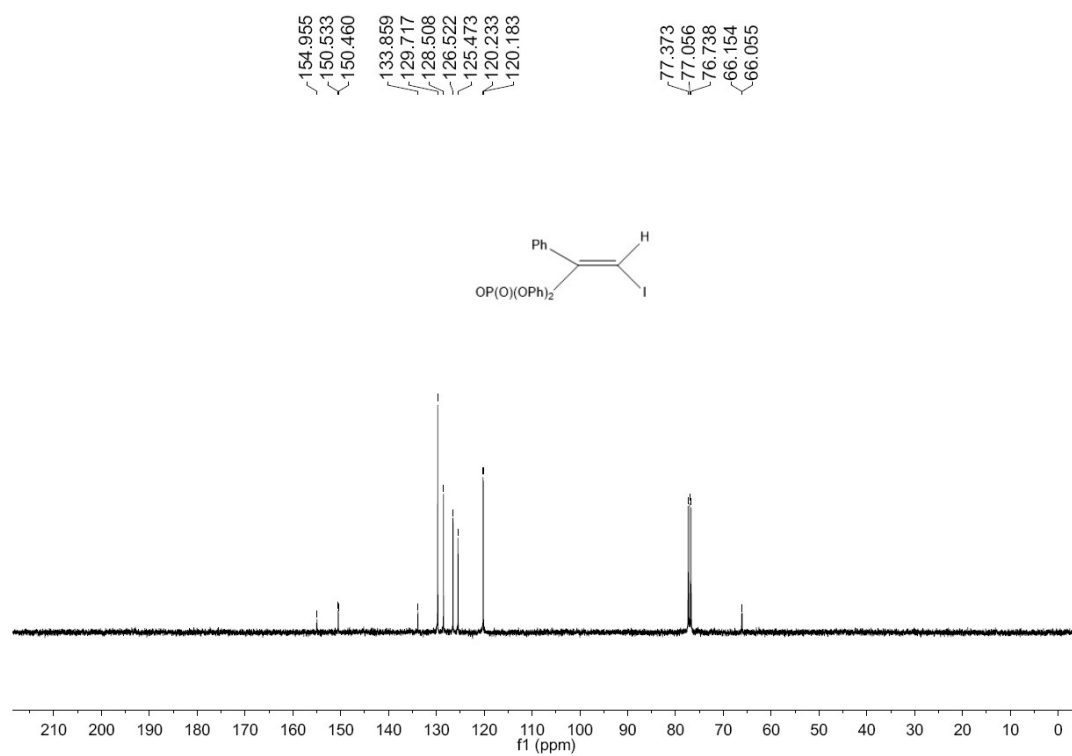

<sup>1</sup>H NMR and <sup>13</sup>C NMR of Compound **4d**

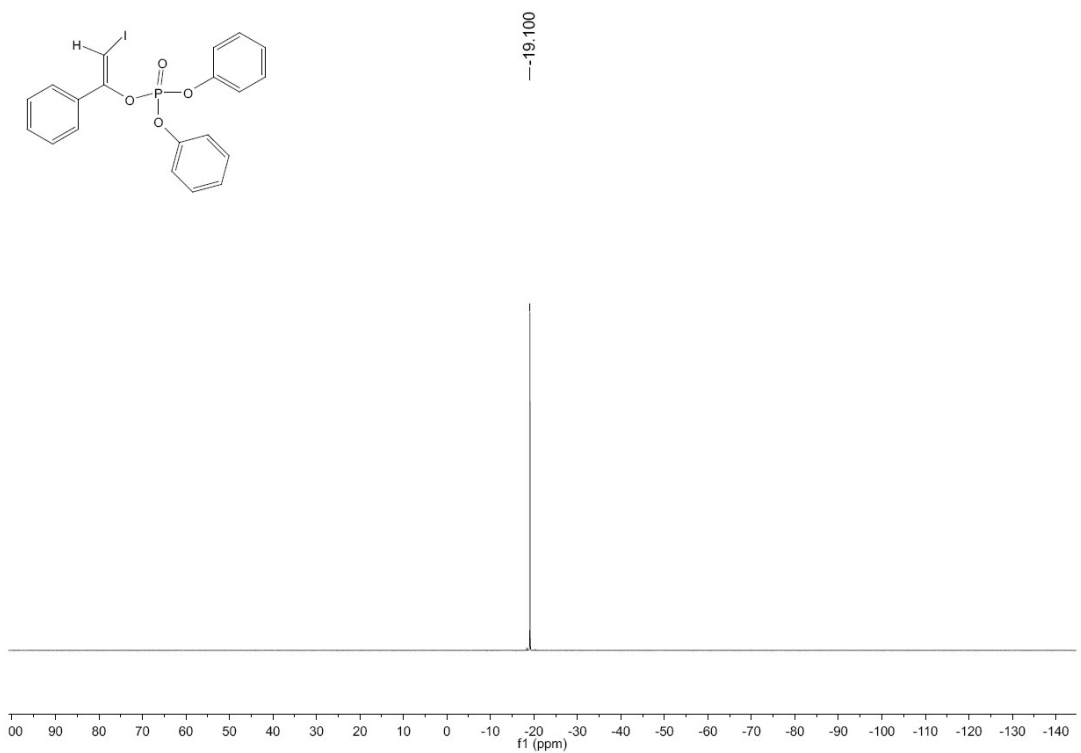

$^{31}\text{P}$  NMR of Compound **4d**

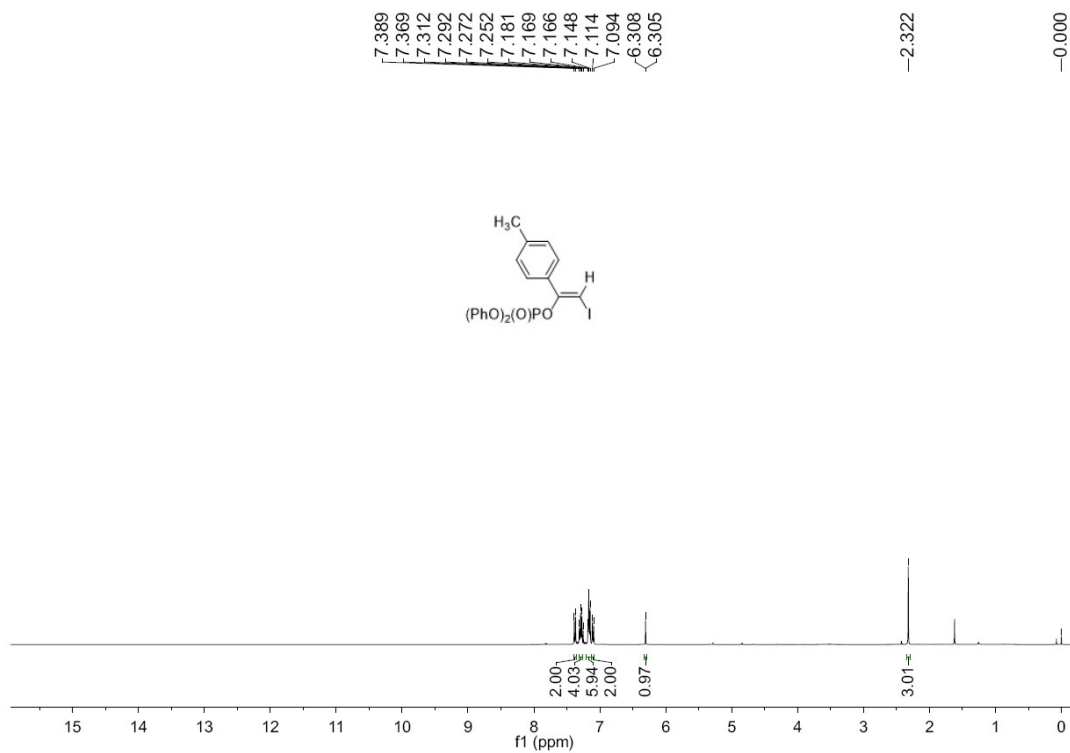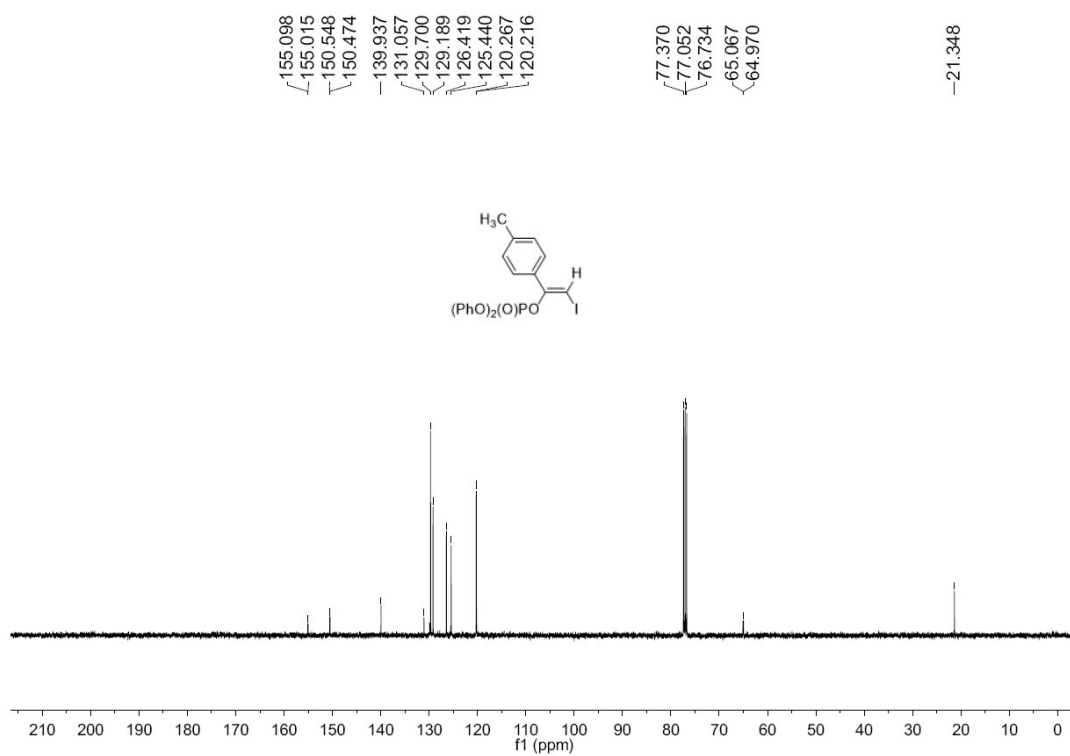

<sup>1</sup>H NMR and <sup>13</sup>C NMR of Compound 4e

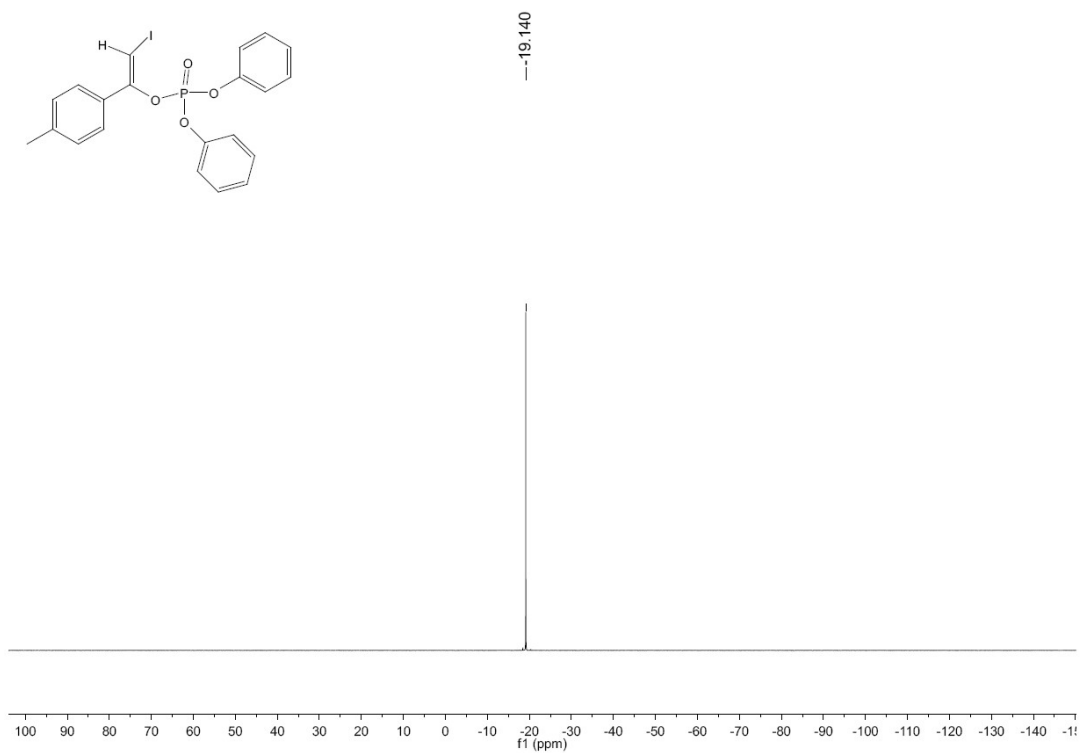

$^{31}\text{P}$  NMR of Compound 4e

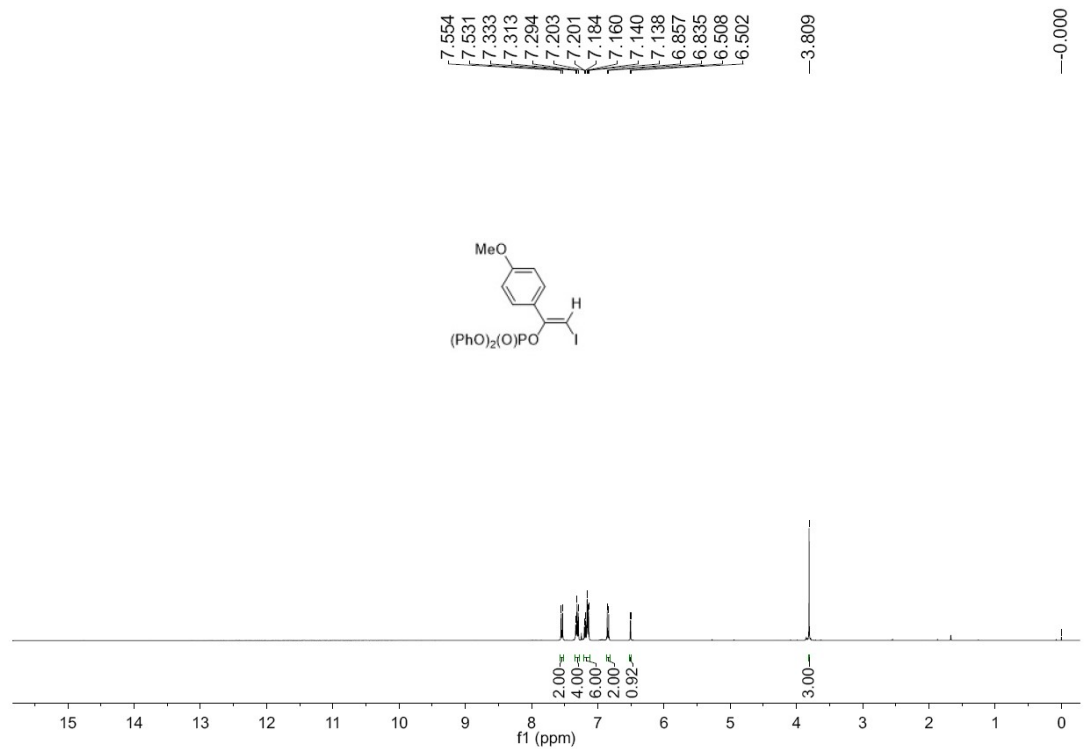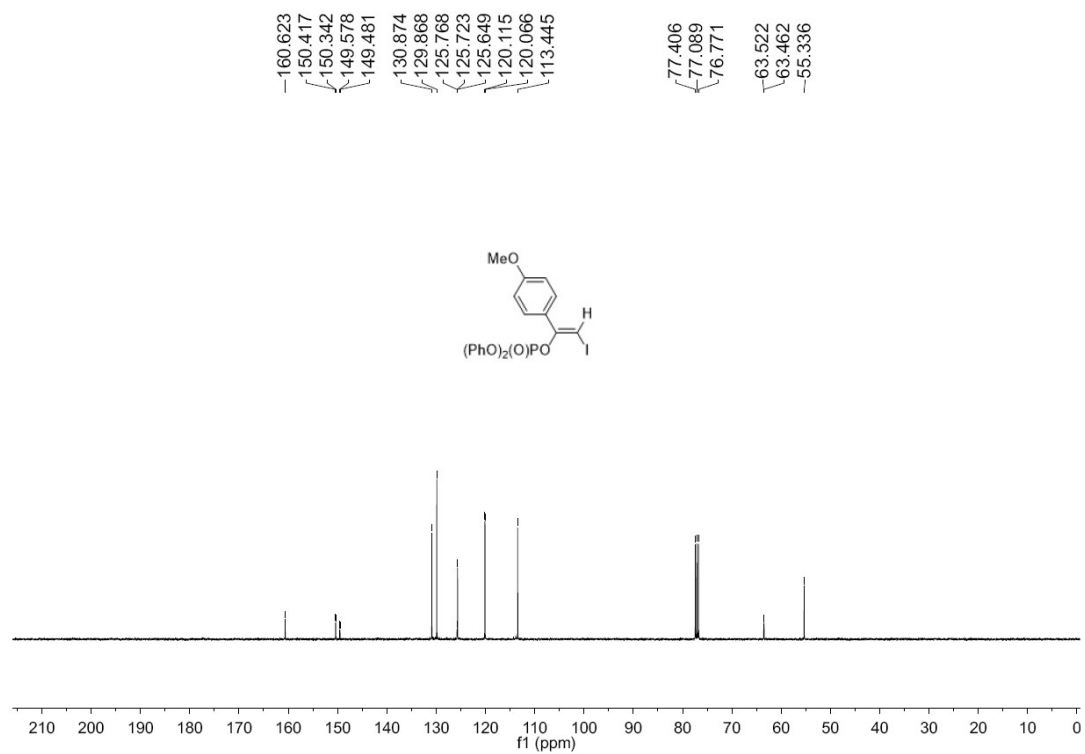

<sup>1</sup>H NMR and <sup>13</sup>C NMR of Compound **4f**

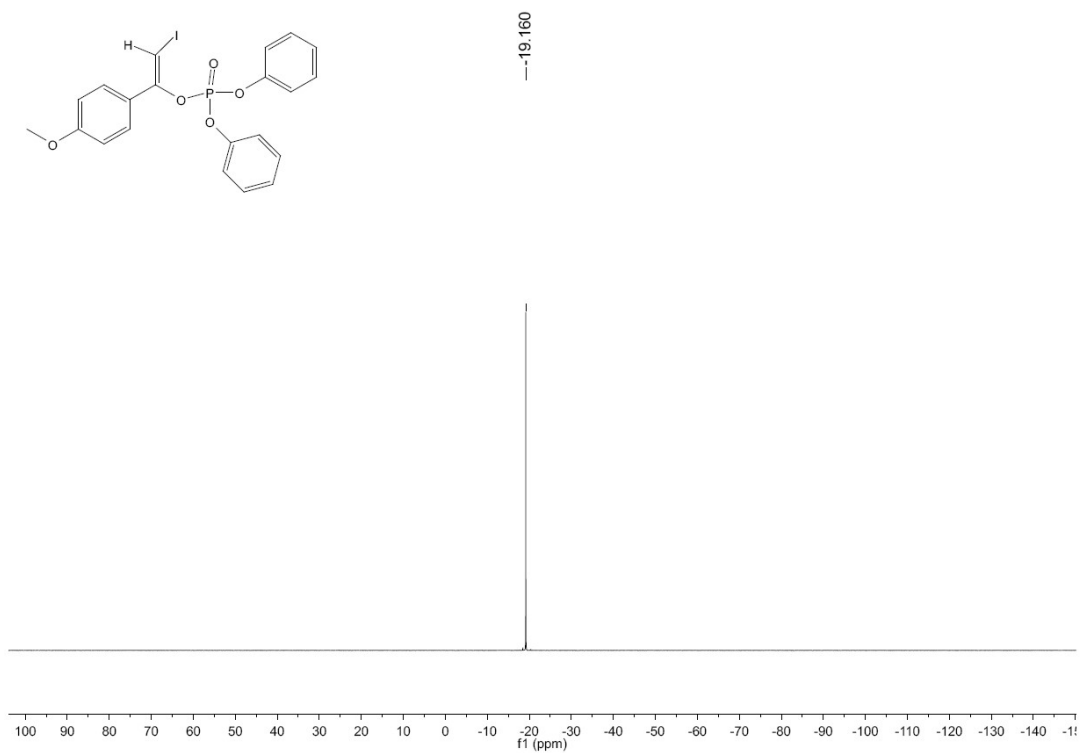

$^{31}\text{P}$  NMR of Compound **4f**

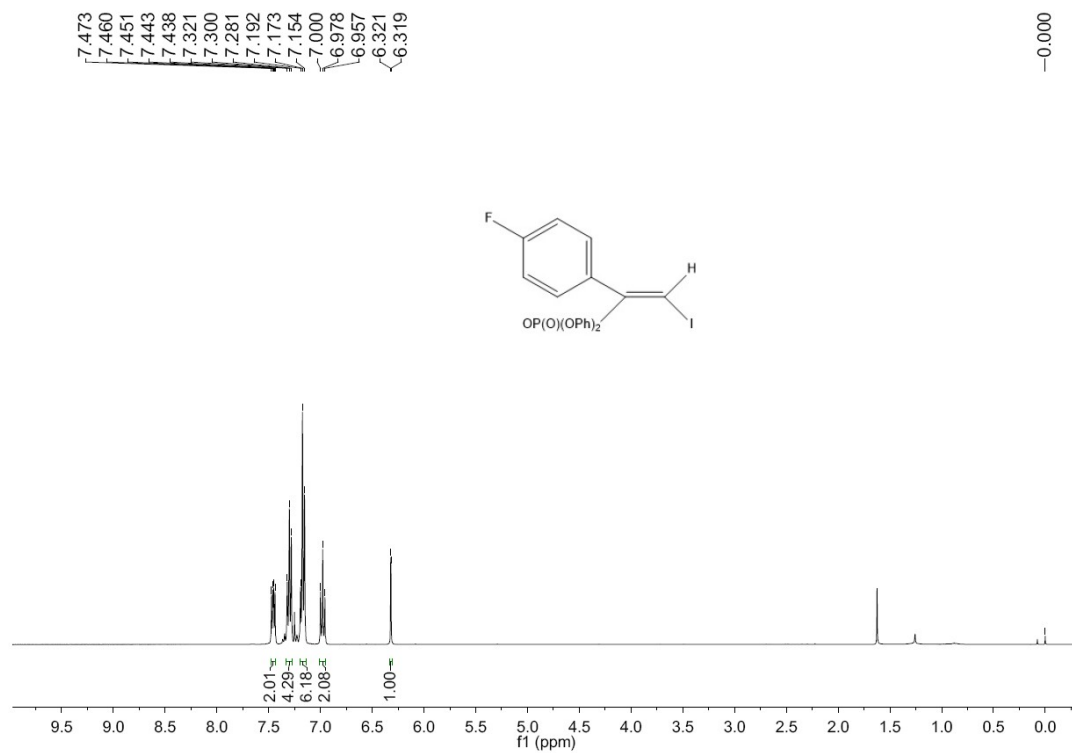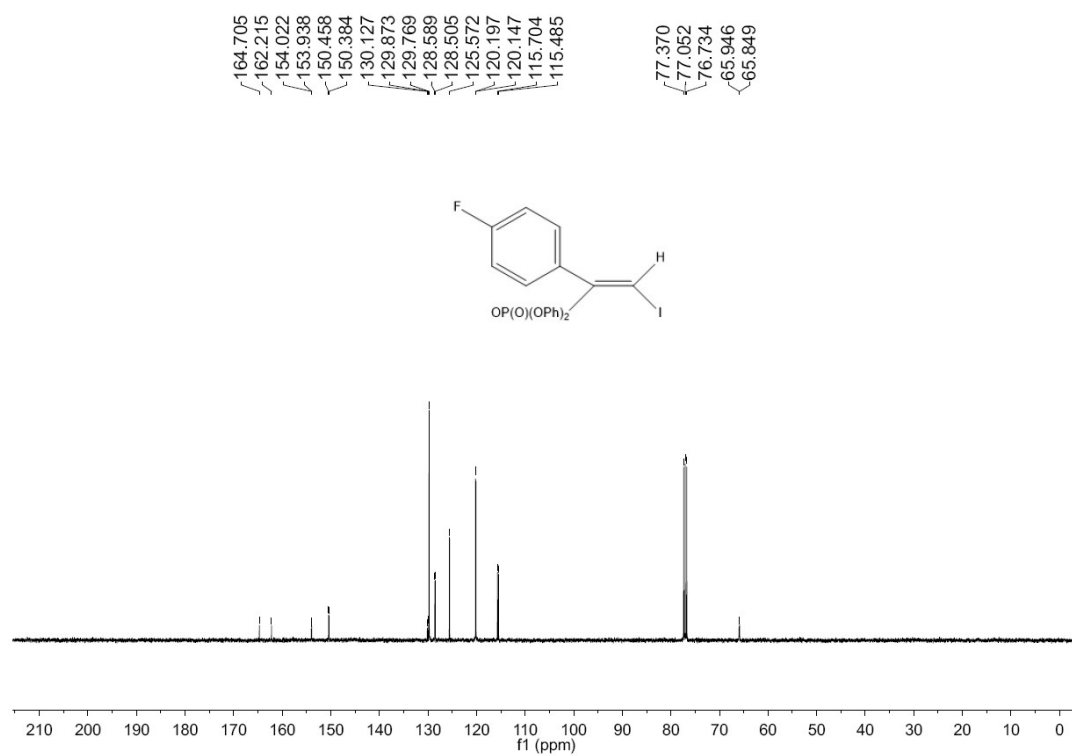

<sup>1</sup>H NMR and <sup>13</sup>C NMR of Compound **4g**

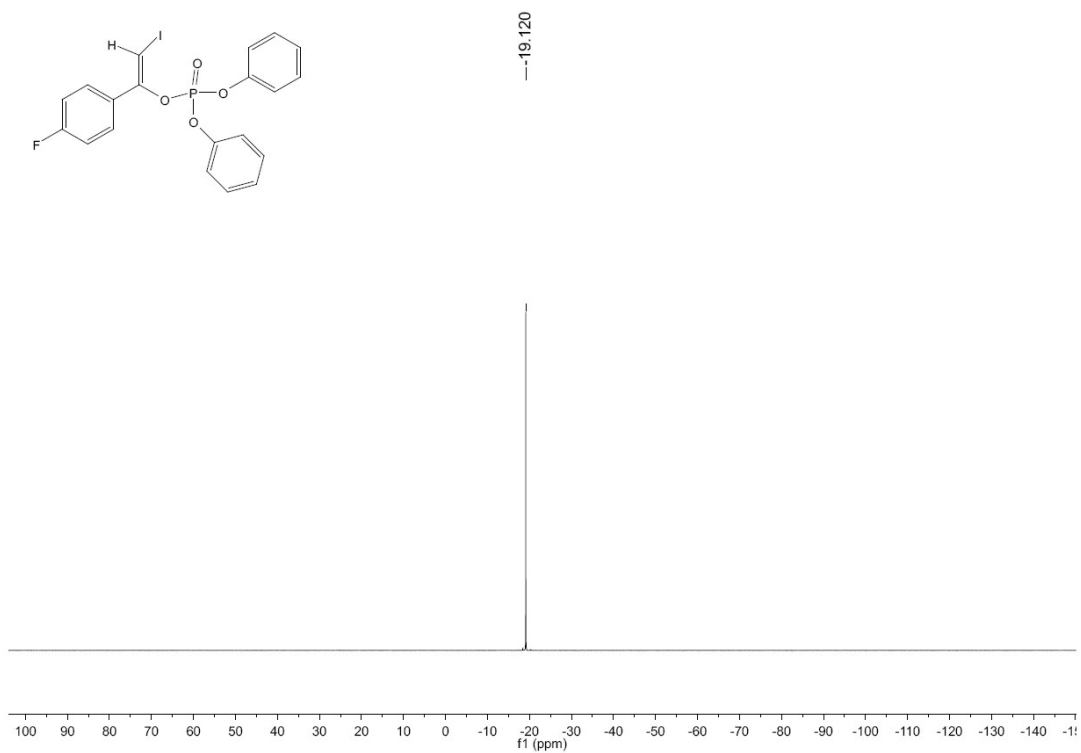

$^{31}\text{P}$  NMR of Compound **4g**

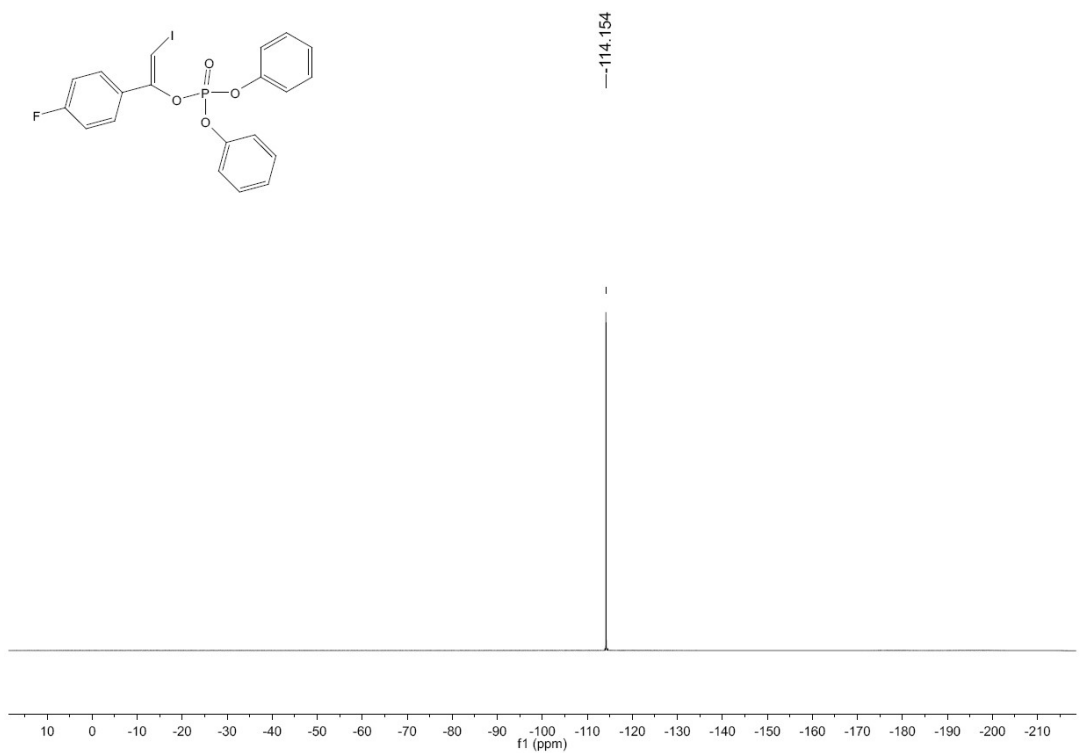

$^{19}\text{F}$  NMR of Compound **4g**

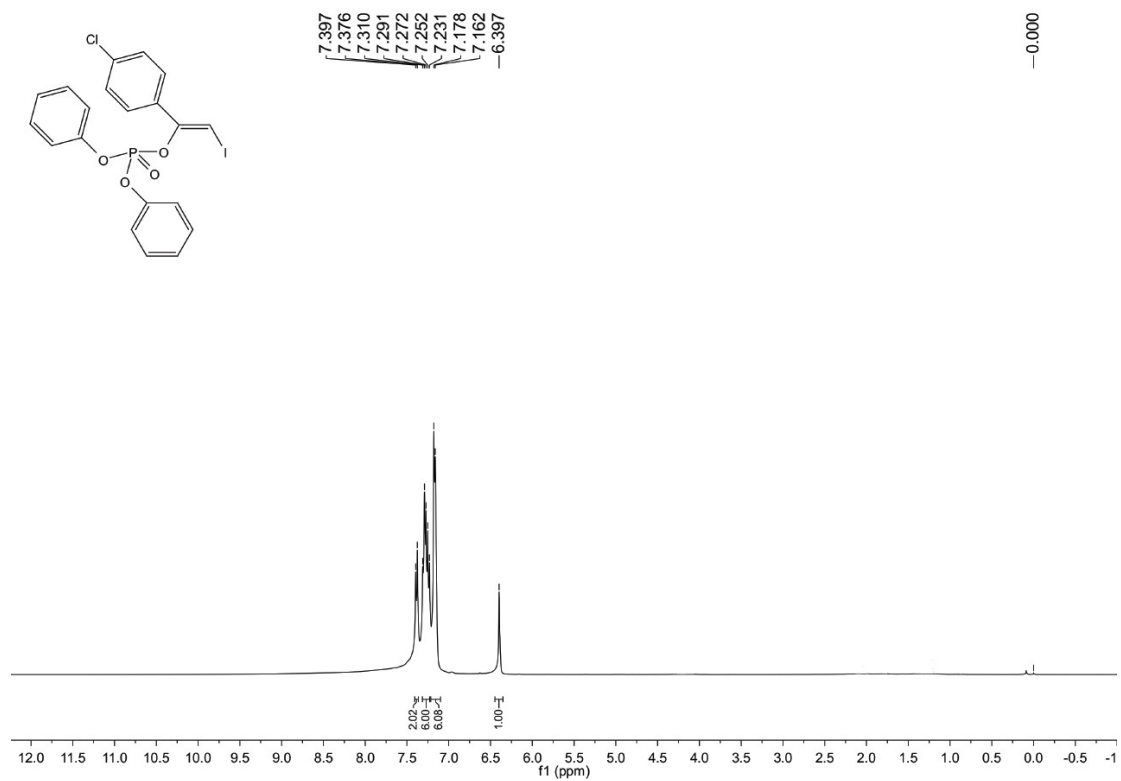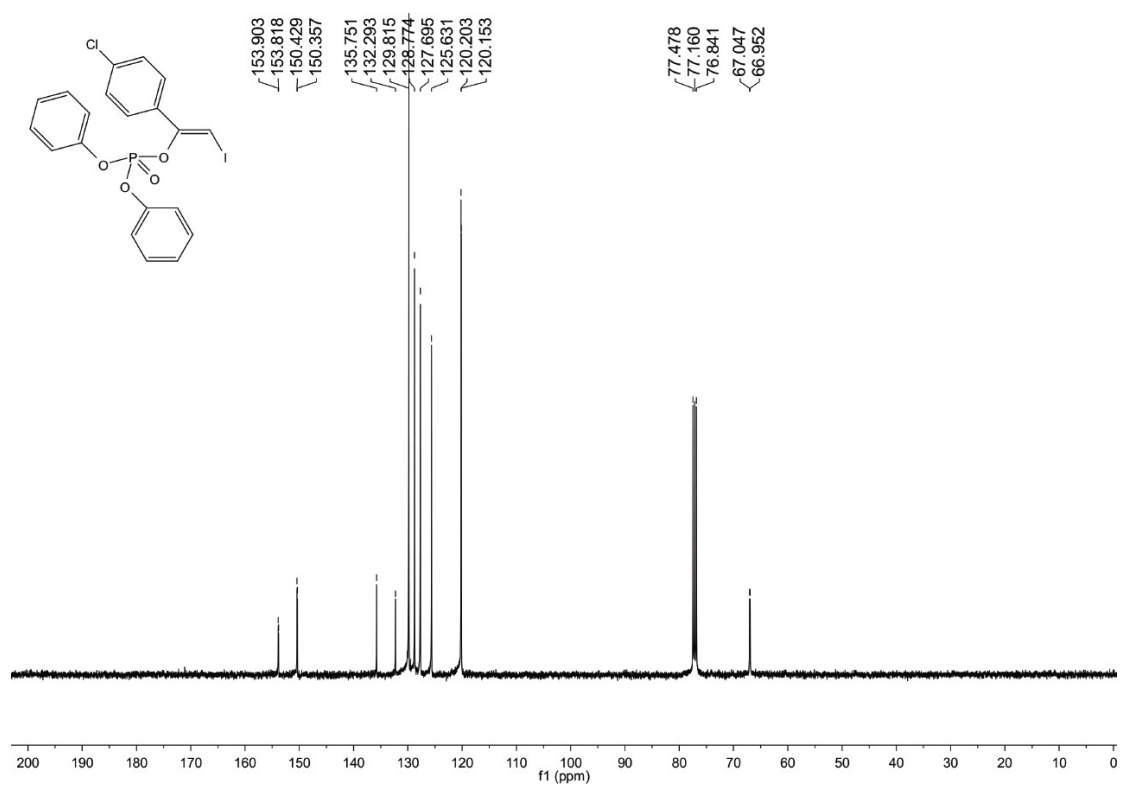

**<sup>1</sup>H NMR and <sup>13</sup>C NMR of Compound 4h**

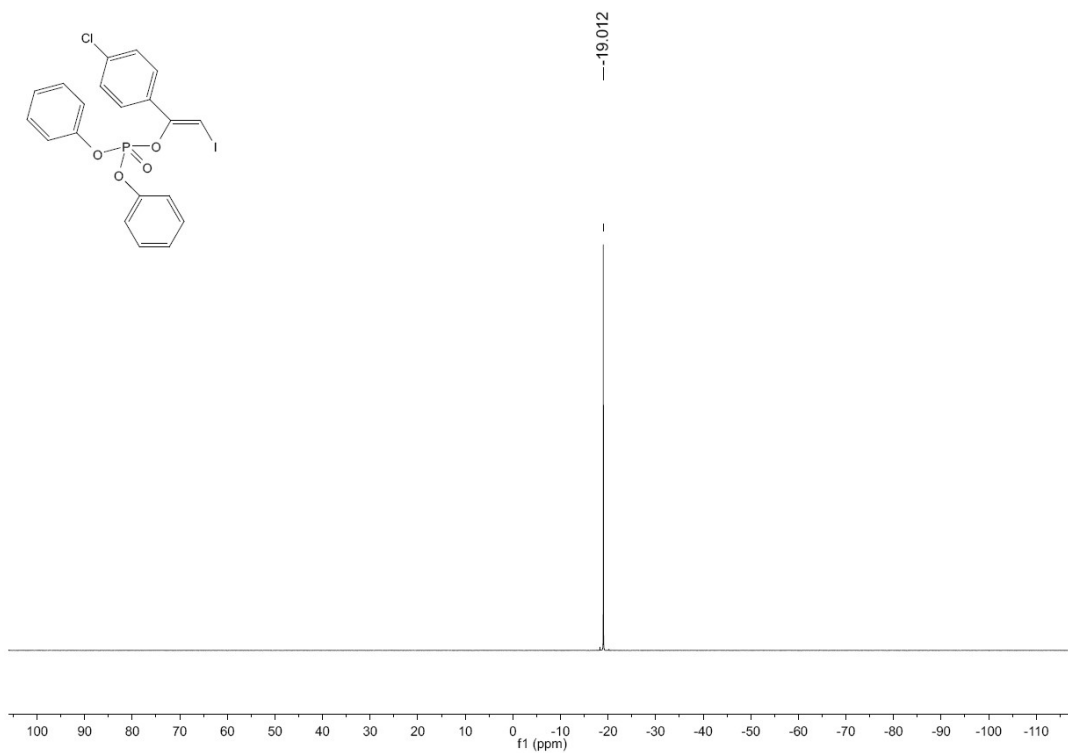

$^{31}\text{P}$  NMR of Compound **4h**

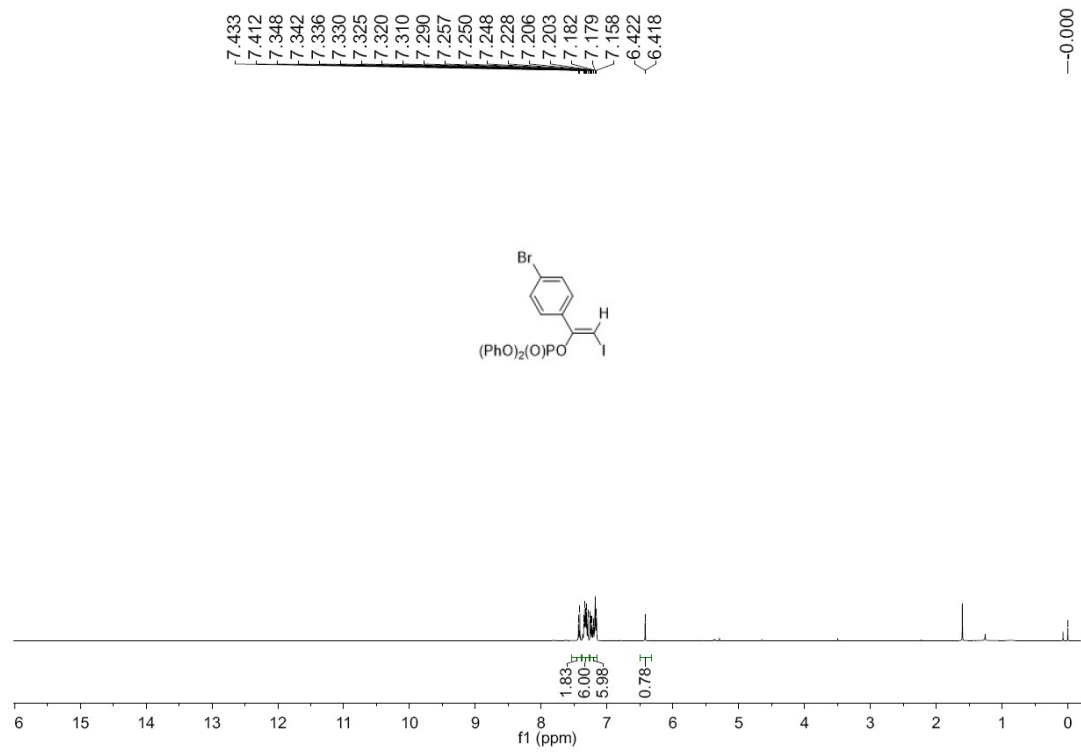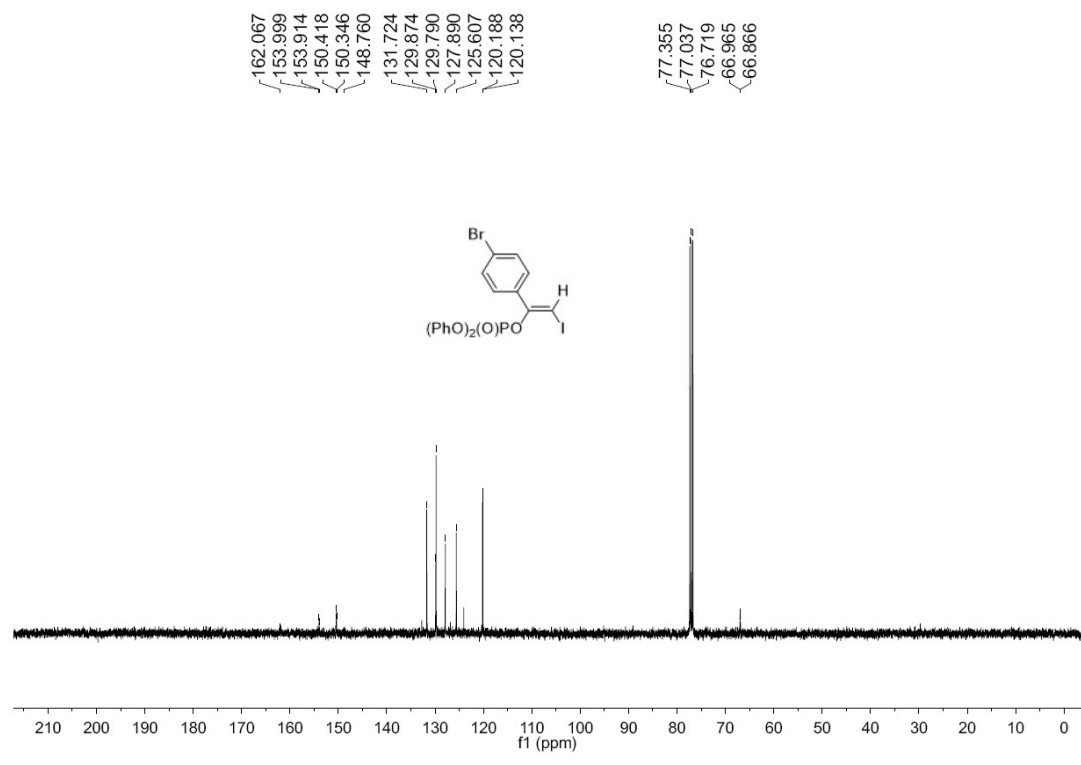

<sup>1</sup>H NMR and <sup>13</sup>C NMR of Compound **4i**

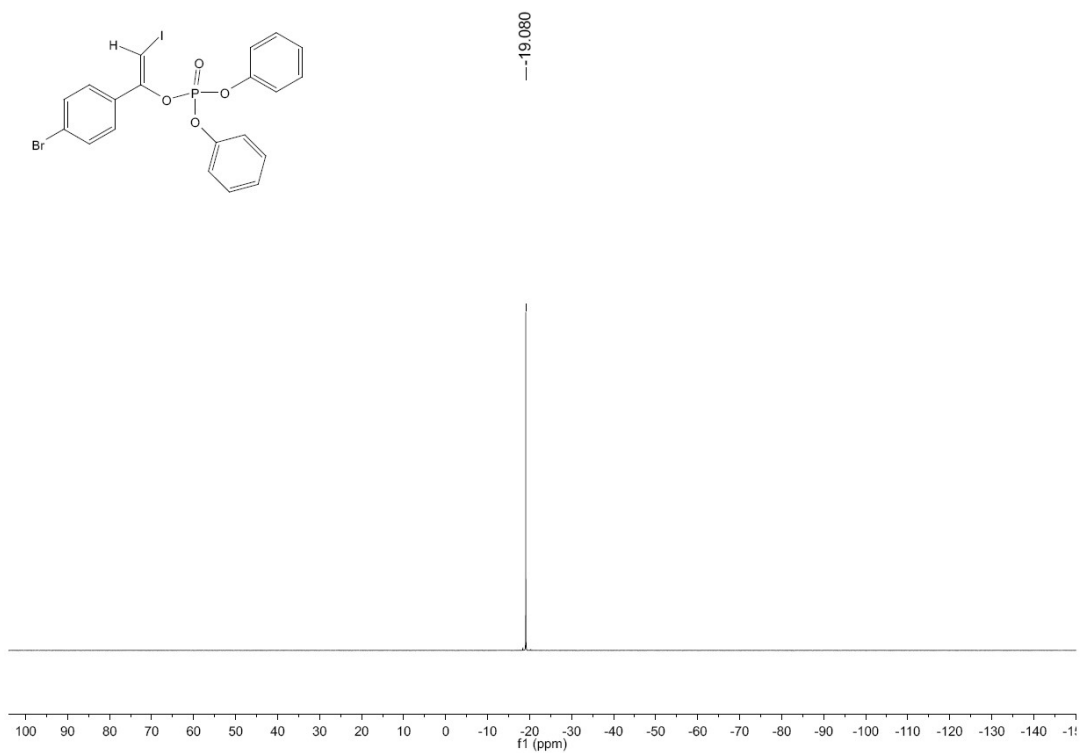

$^{31}\text{P}$  NMR of Compound **4i**

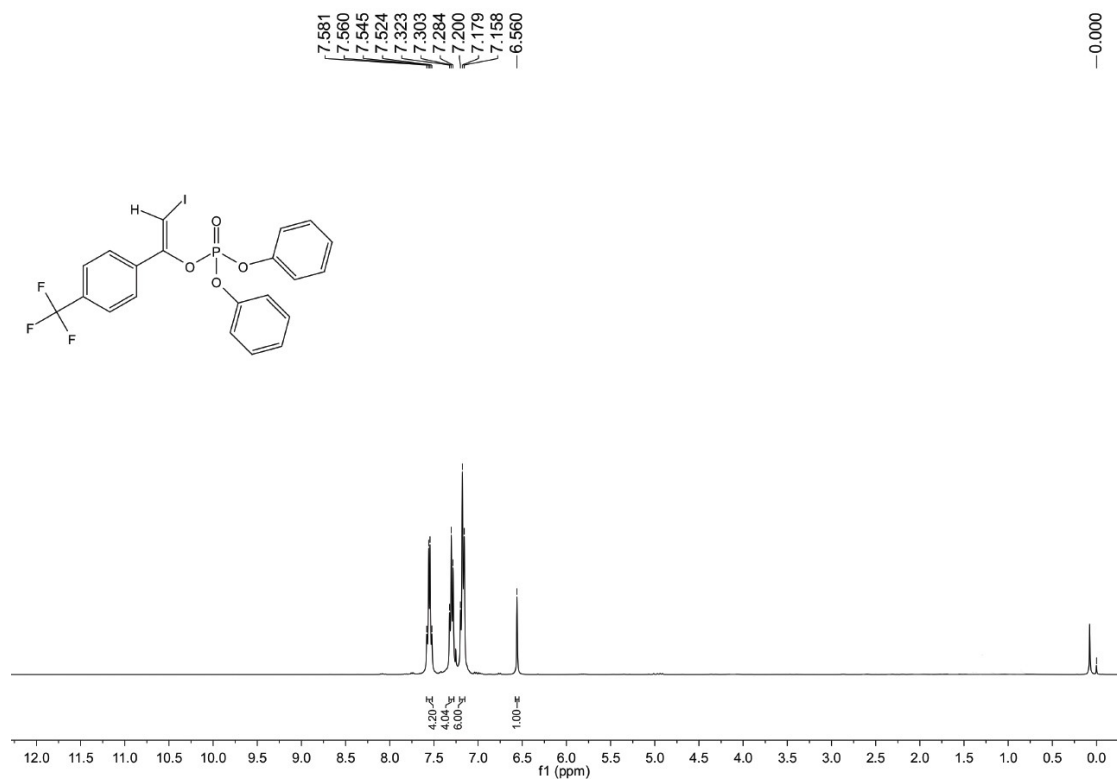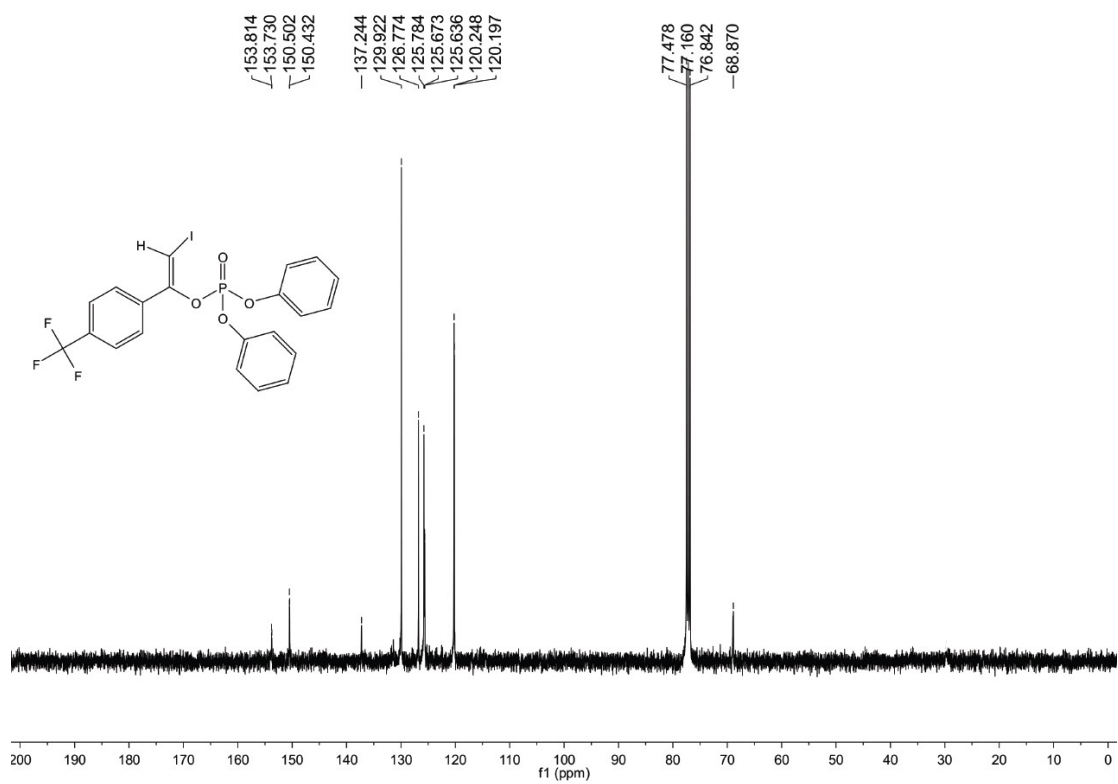

<sup>1</sup>H NMR and <sup>13</sup>C NMR of Compound 4j

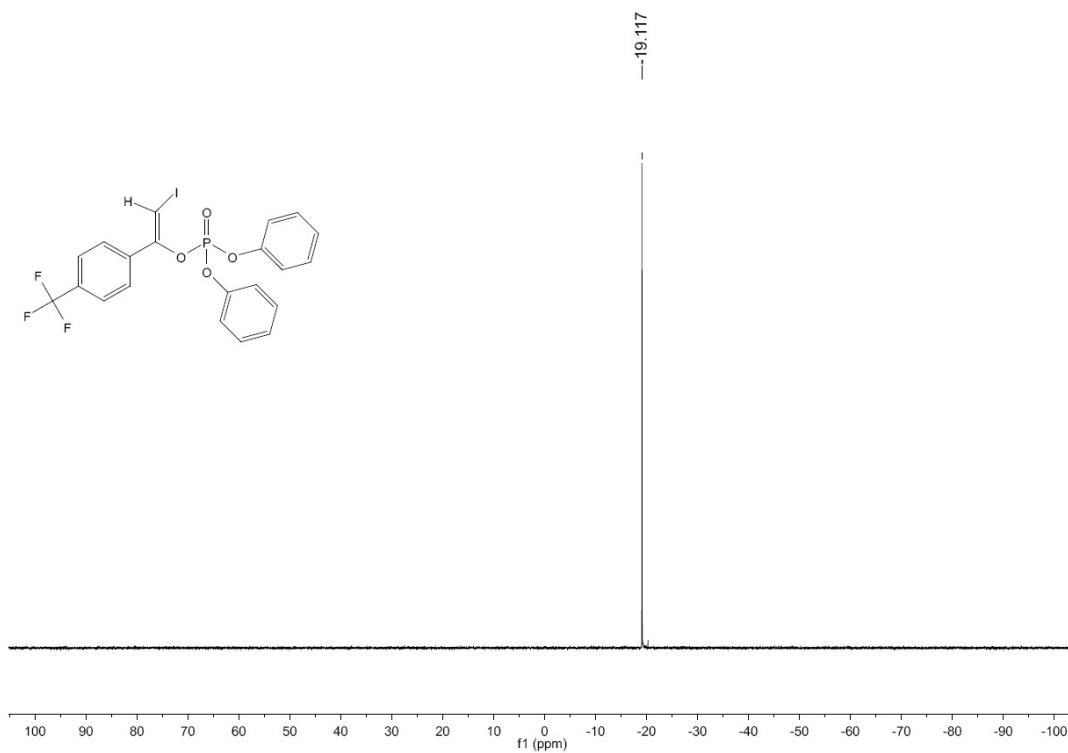

$^{31}\text{P}$  NMR of Compound 4j

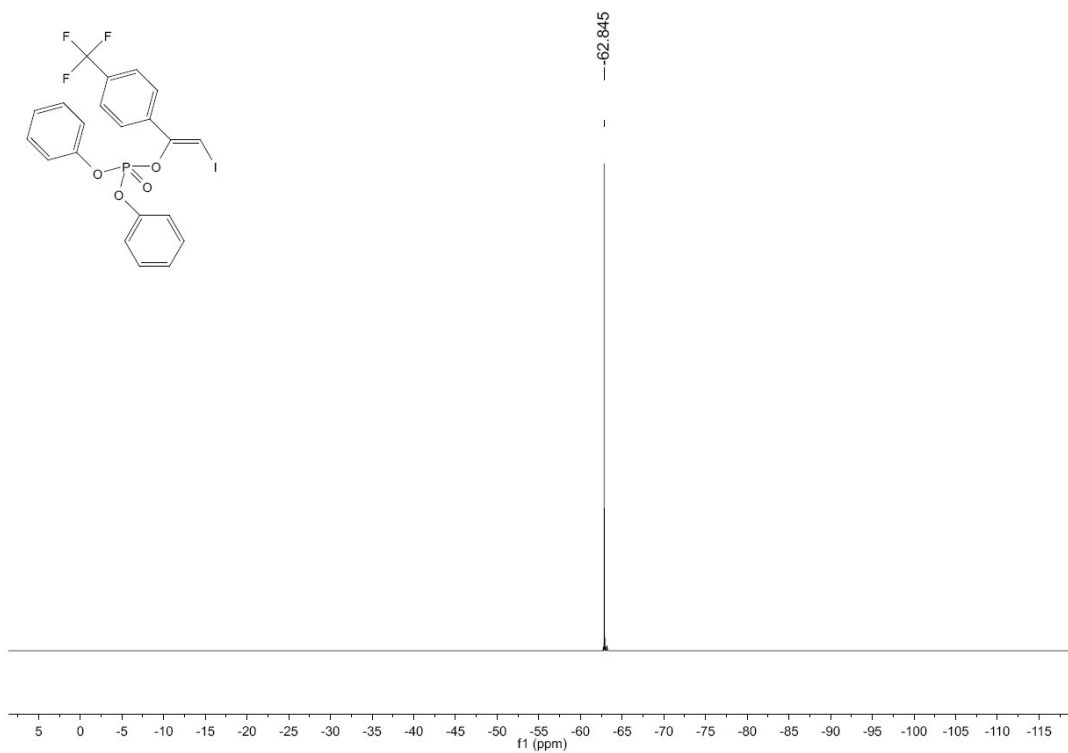

$^{19}\text{F}$  NMR of Compound 4j

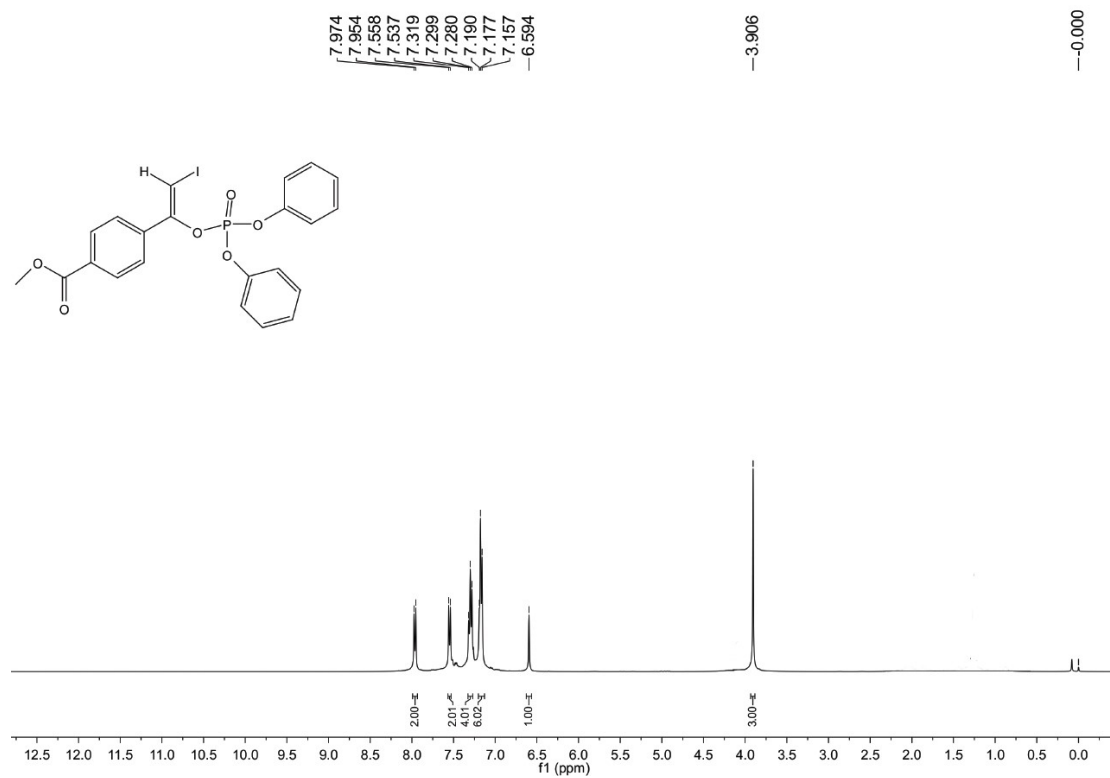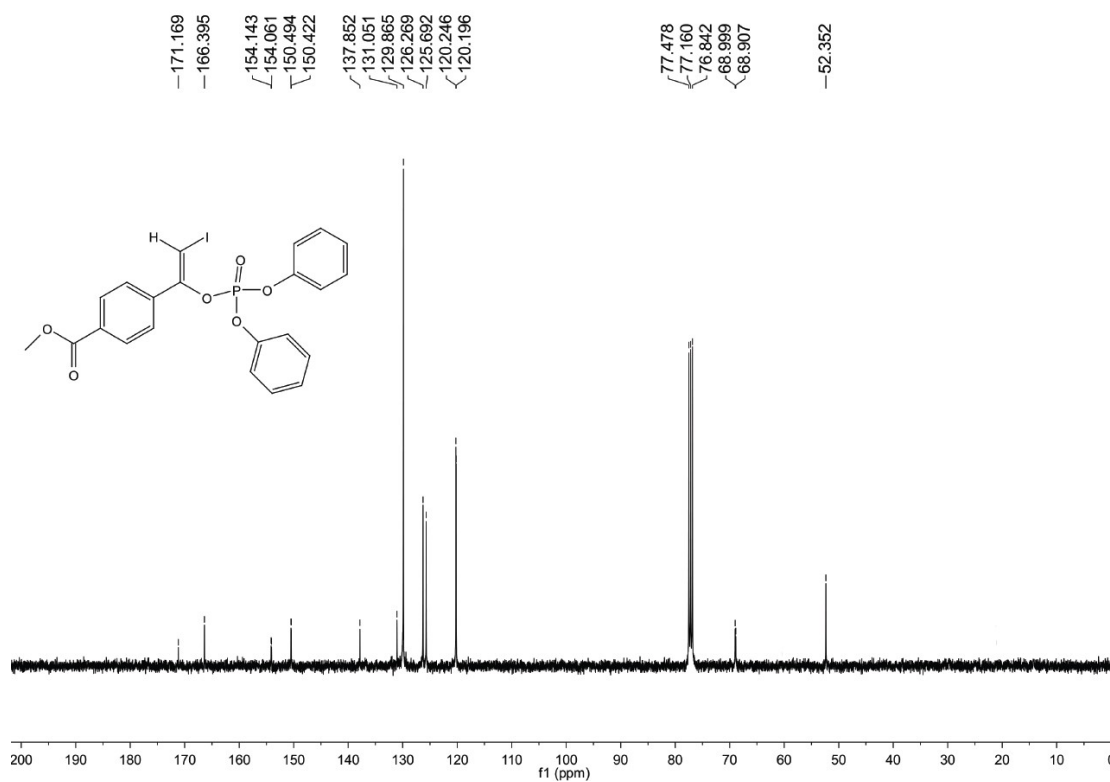

<sup>1</sup>H NMR and <sup>13</sup>C NMR of Compound 4k

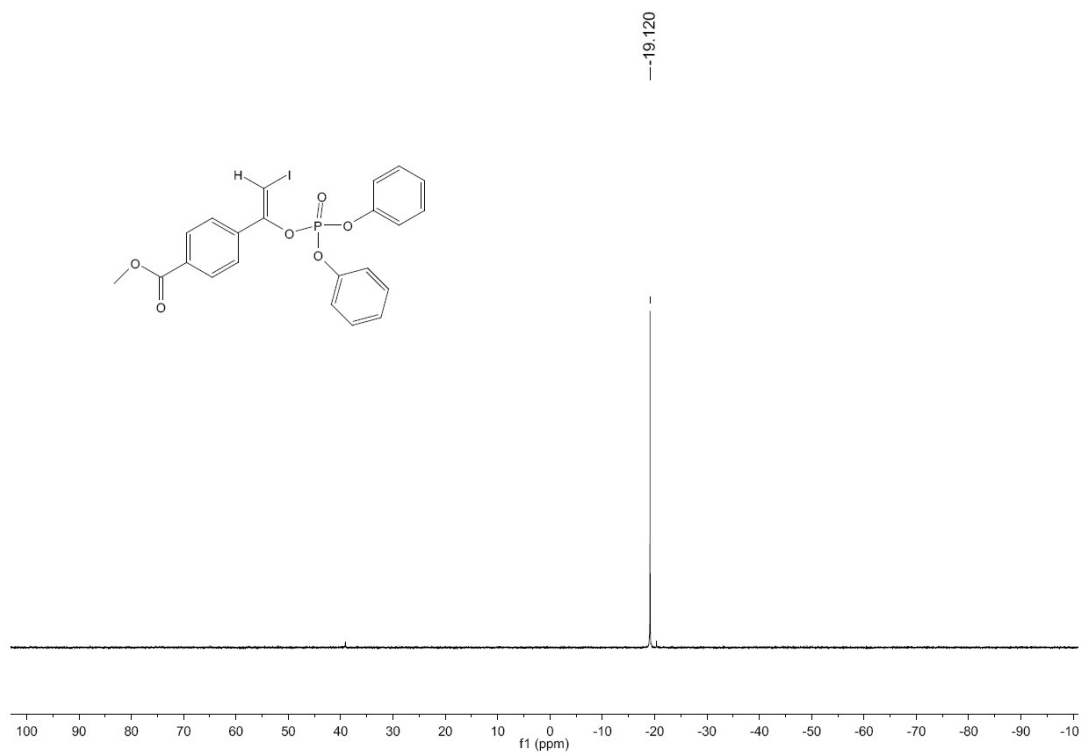

$^{31}\text{P}$  NMR of Compound **4k**

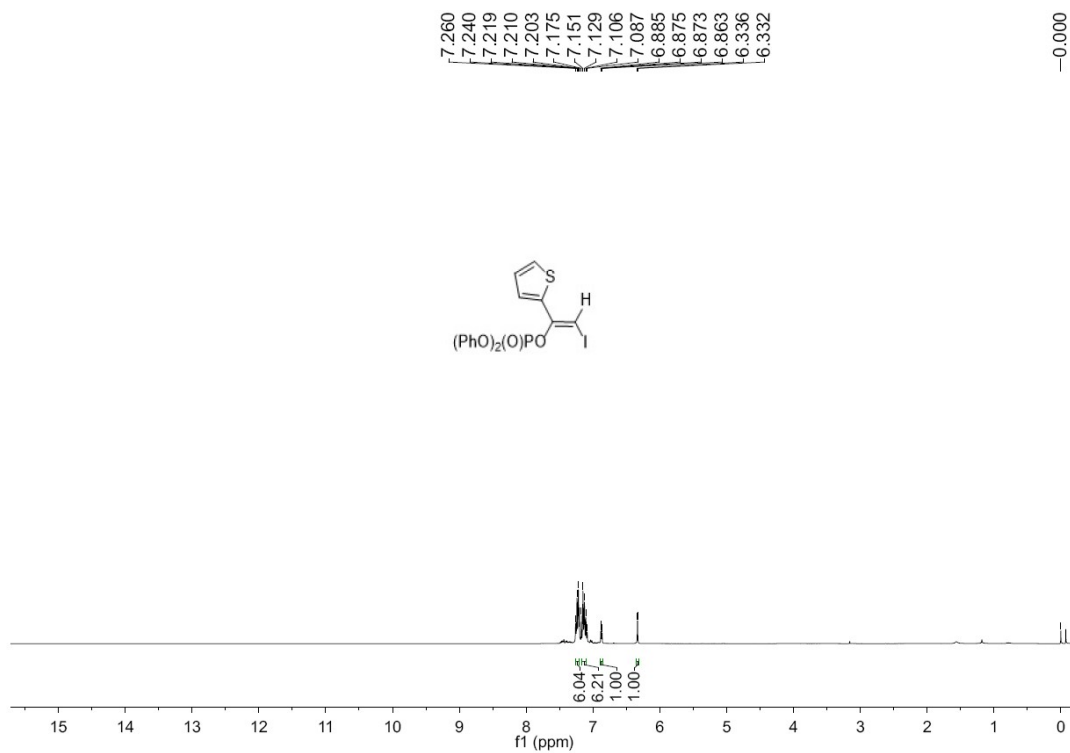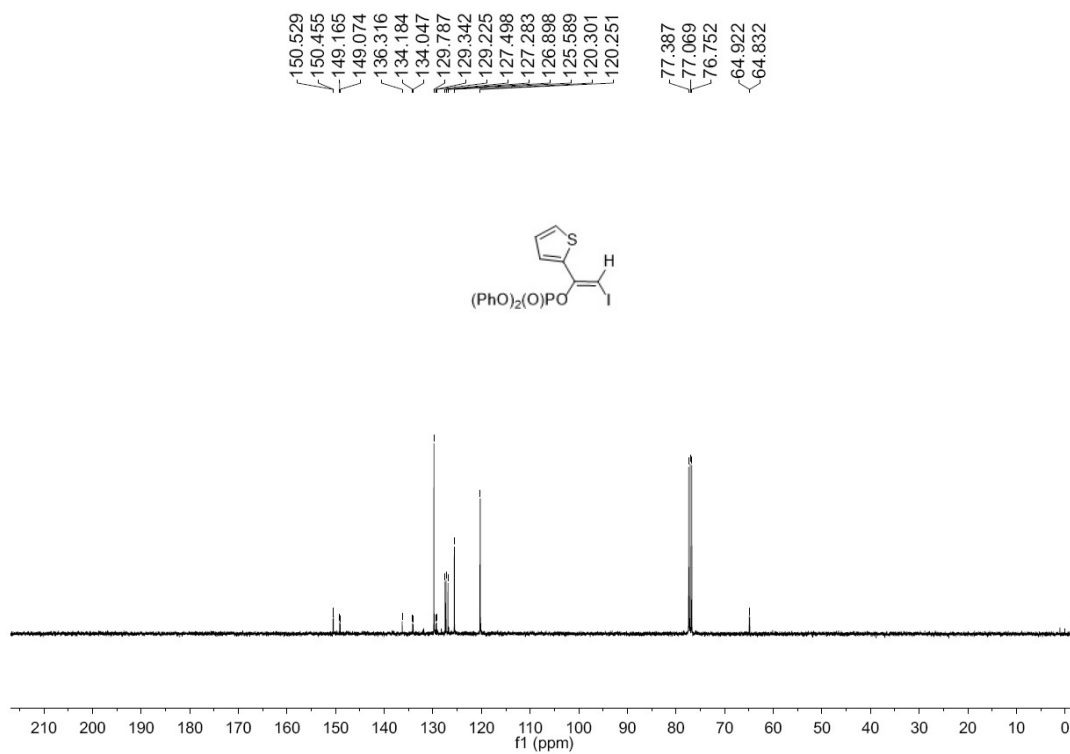

<sup>1</sup>H NMR and <sup>13</sup>C NMR of Compound **4I**

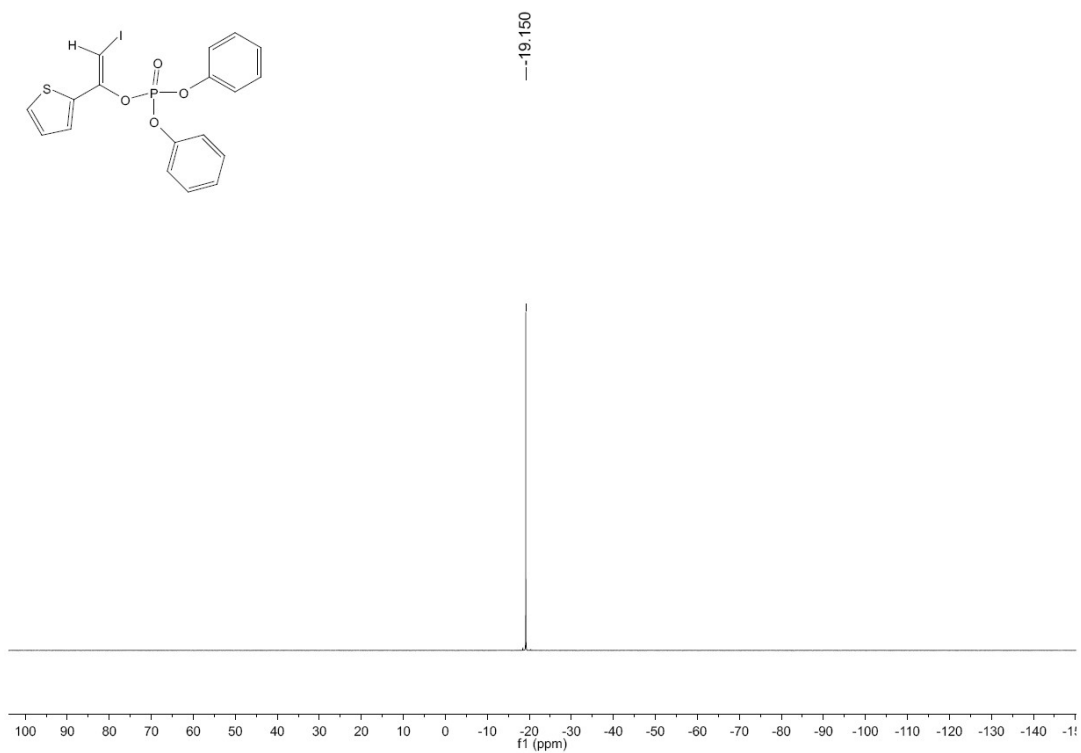

$^{31}\text{P}$  NMR of Compound **4I**

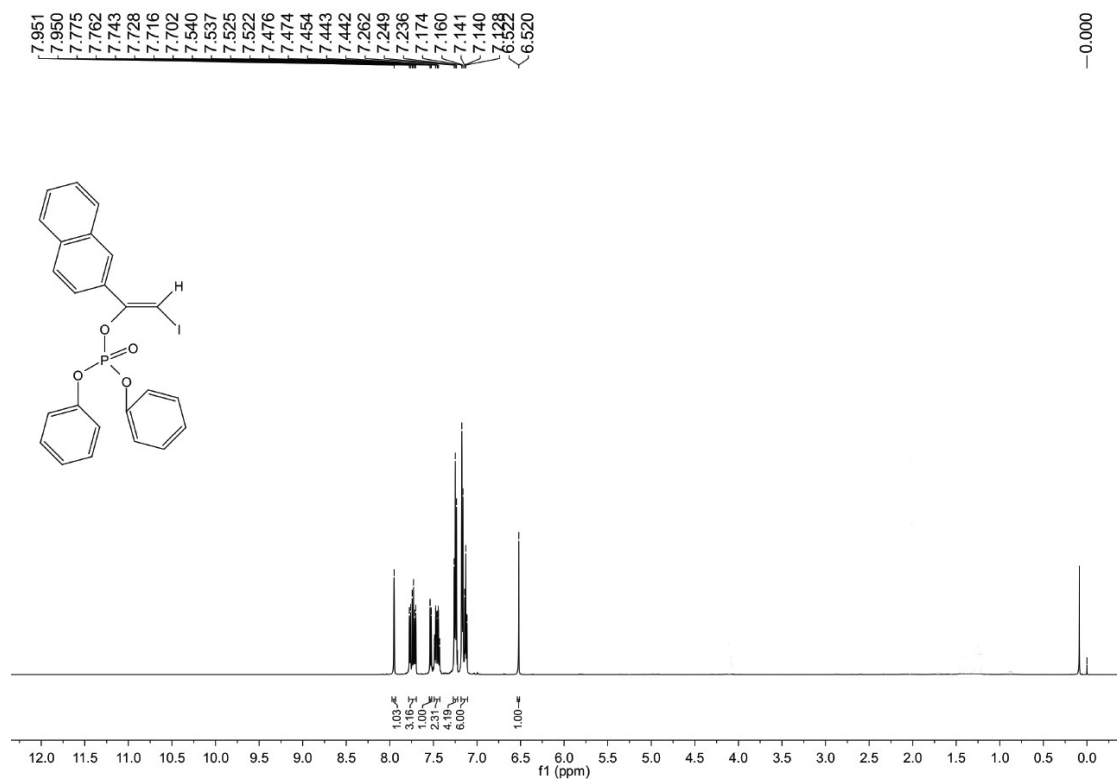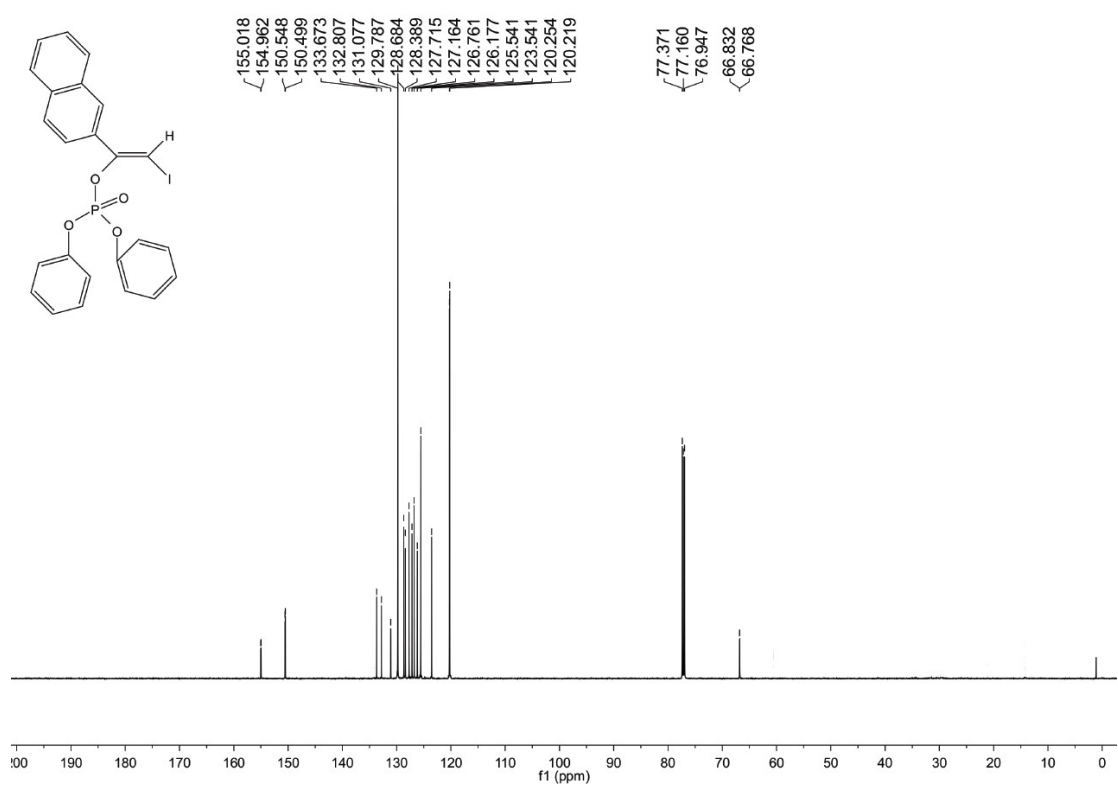

<sup>1</sup>H NMR and <sup>13</sup>C NMR of Compound 4m

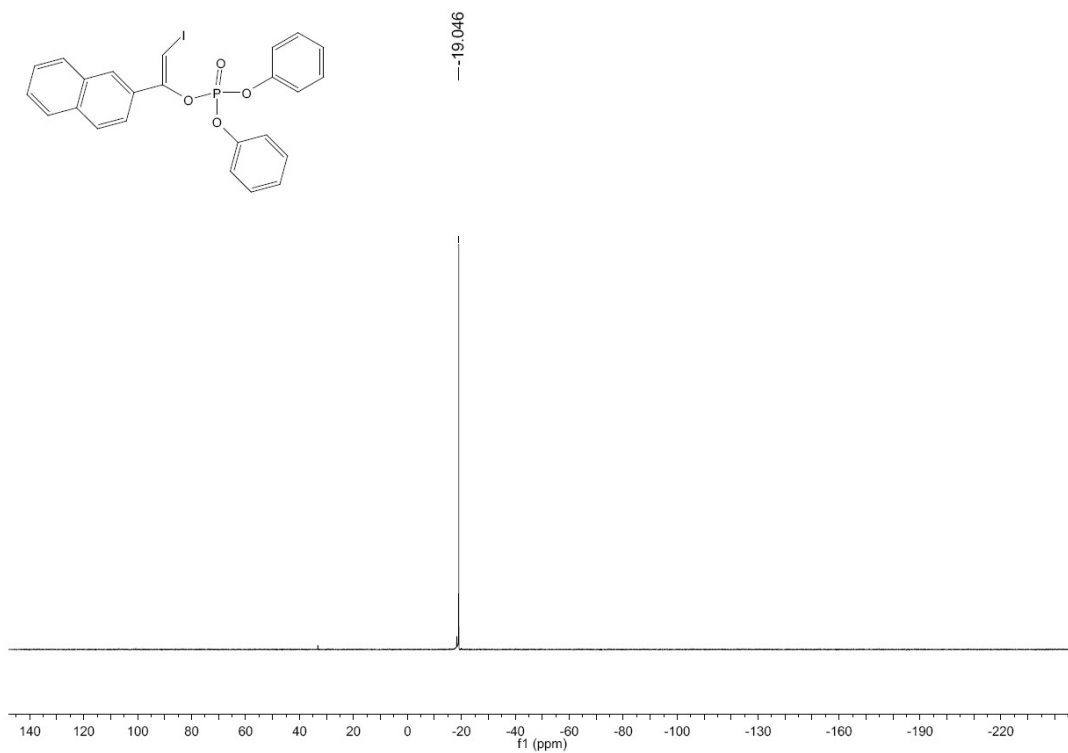

$^{31}\text{P}$  NMR of Compound **4m**

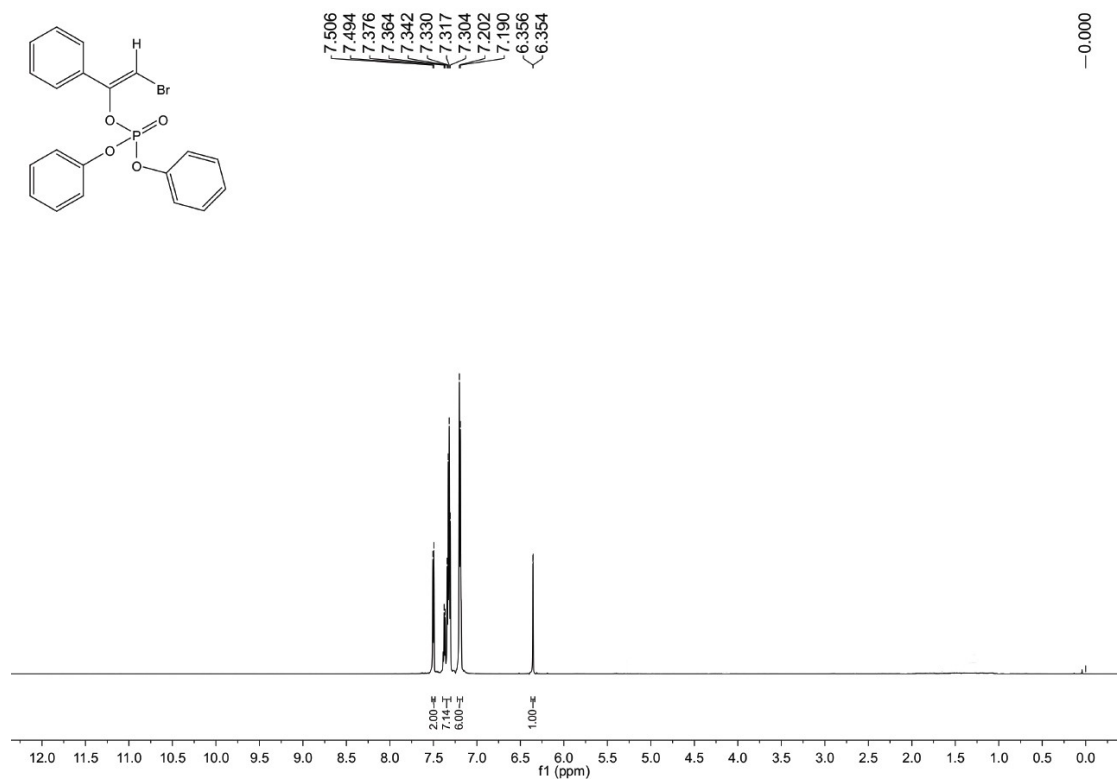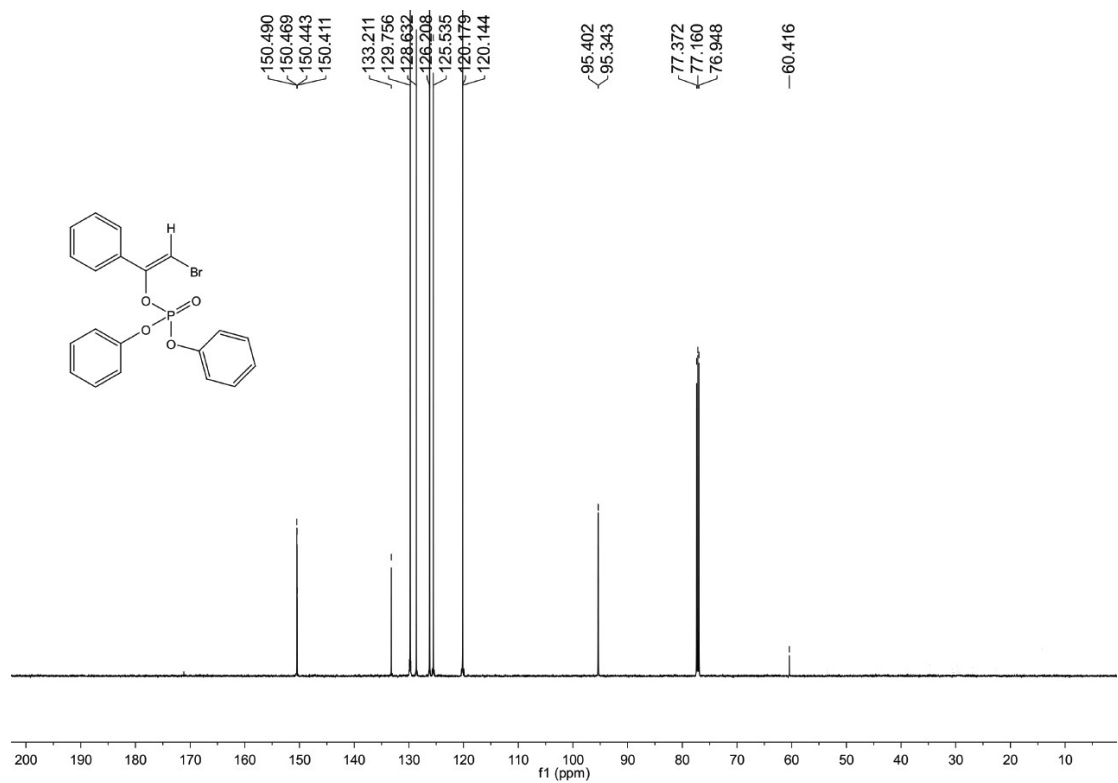

<sup>1</sup>H NMR and <sup>13</sup>C NMR of Compound 4n

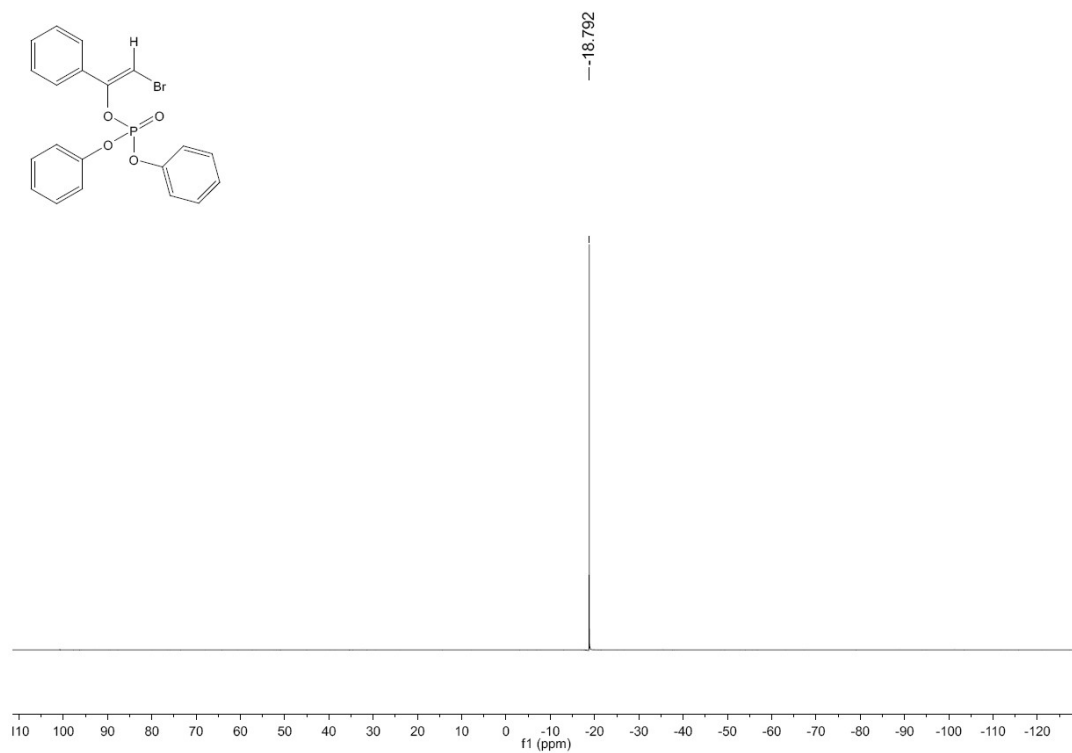

$^{31}\text{P}$  NMR of Compound **4n**

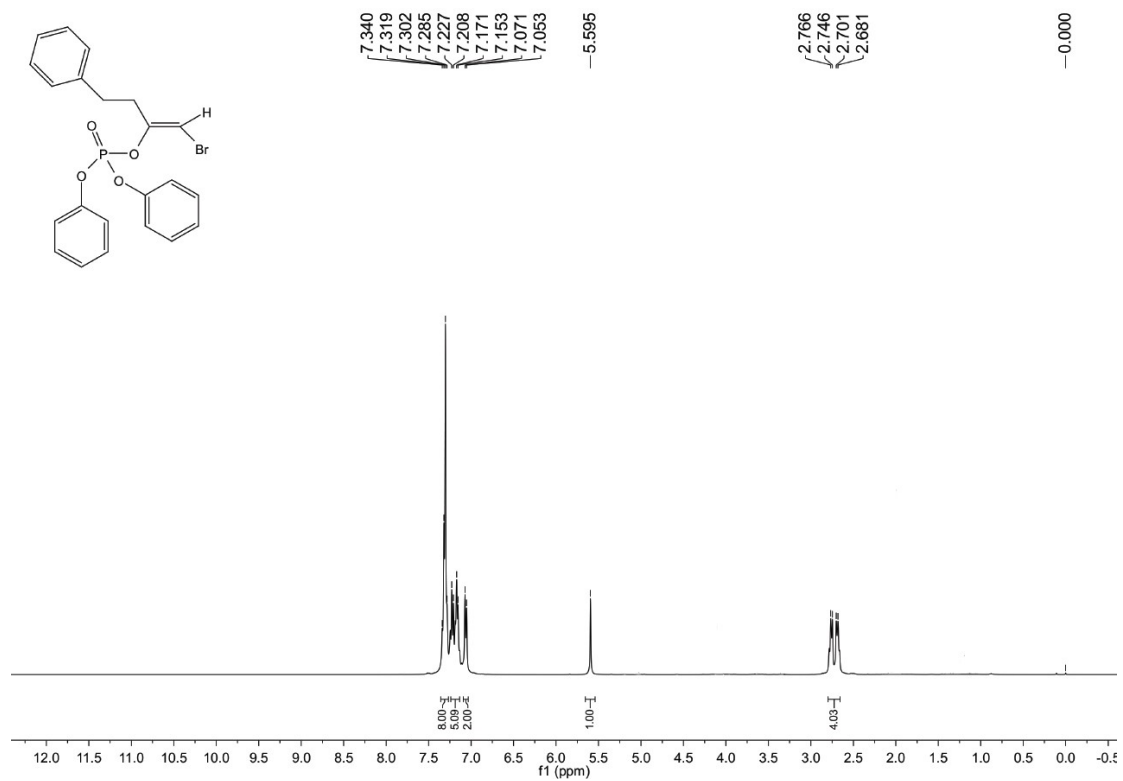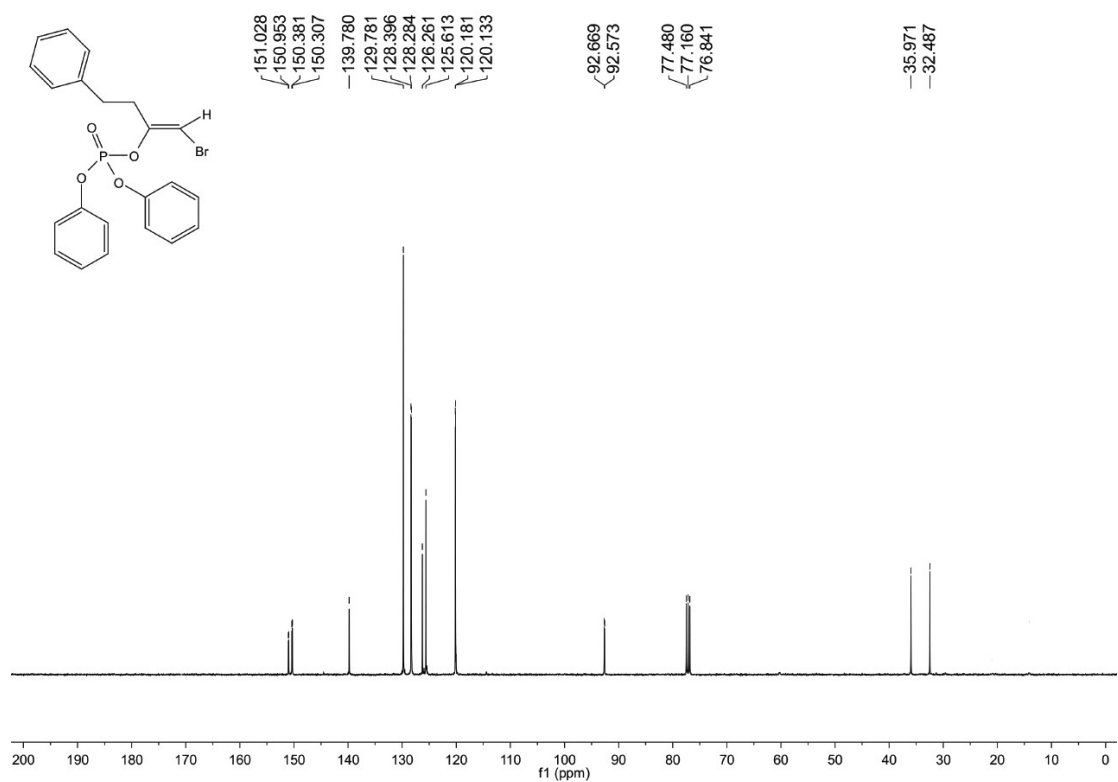

$^1\text{H}$  NMR and  $^{13}\text{C}$  NMR of Compound **40**

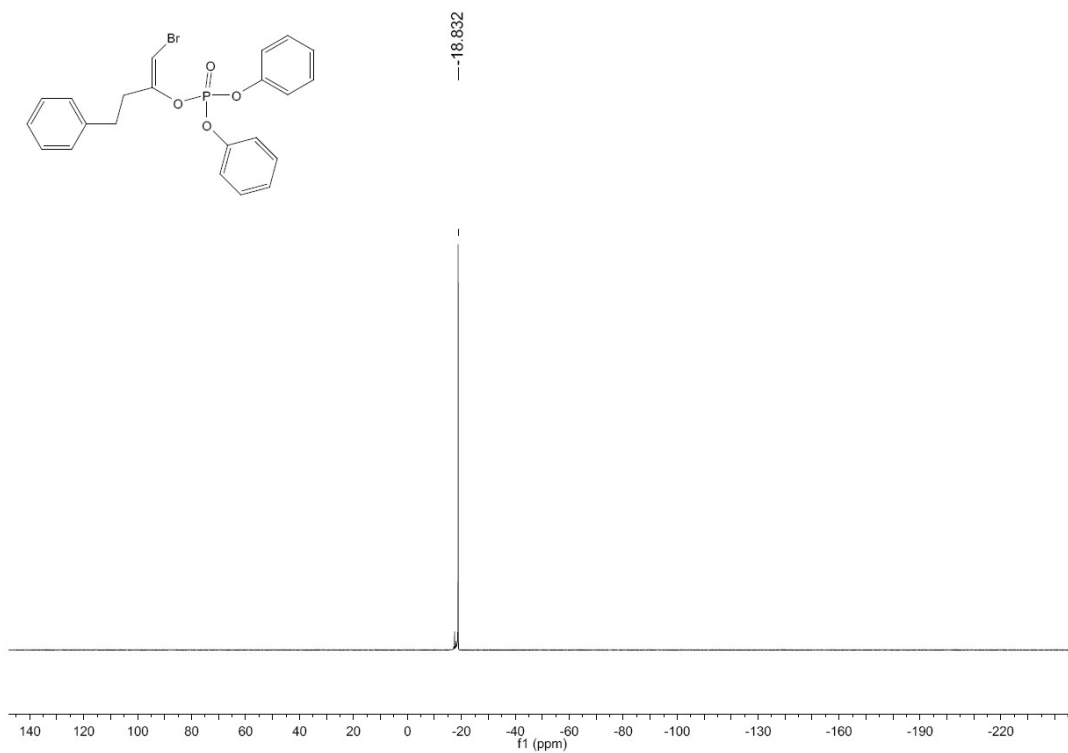

$^{31}\text{P}$  NMR of Compound **40**

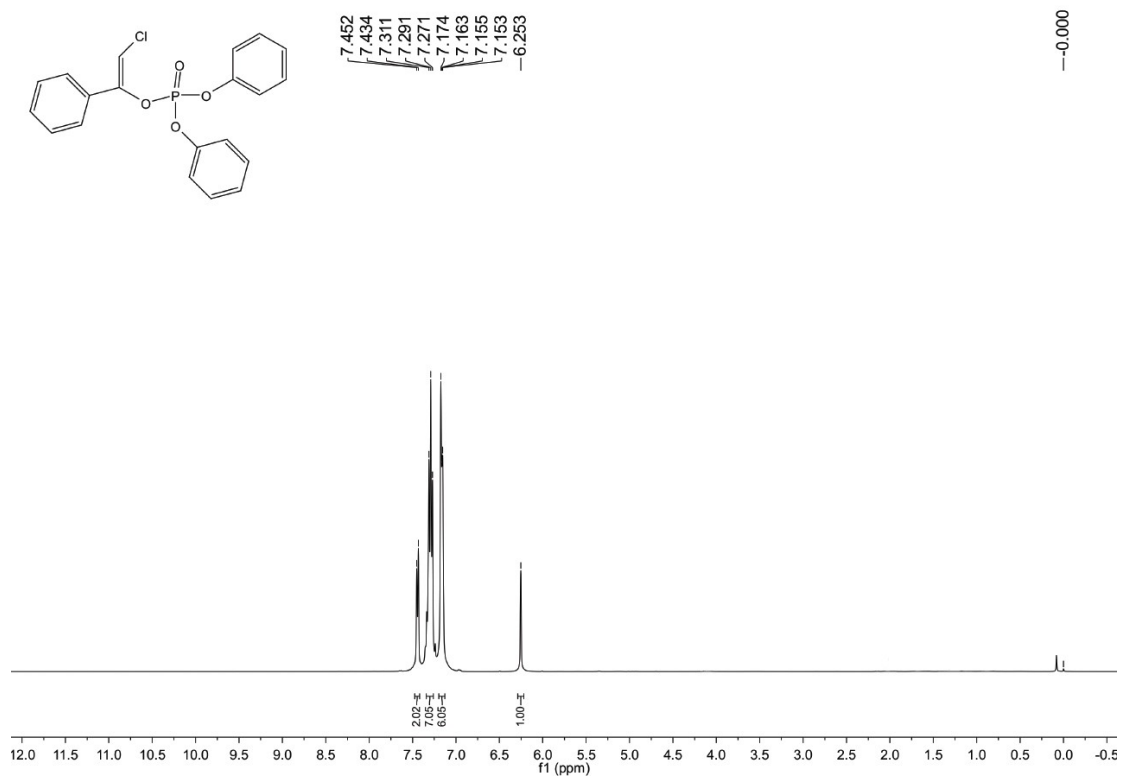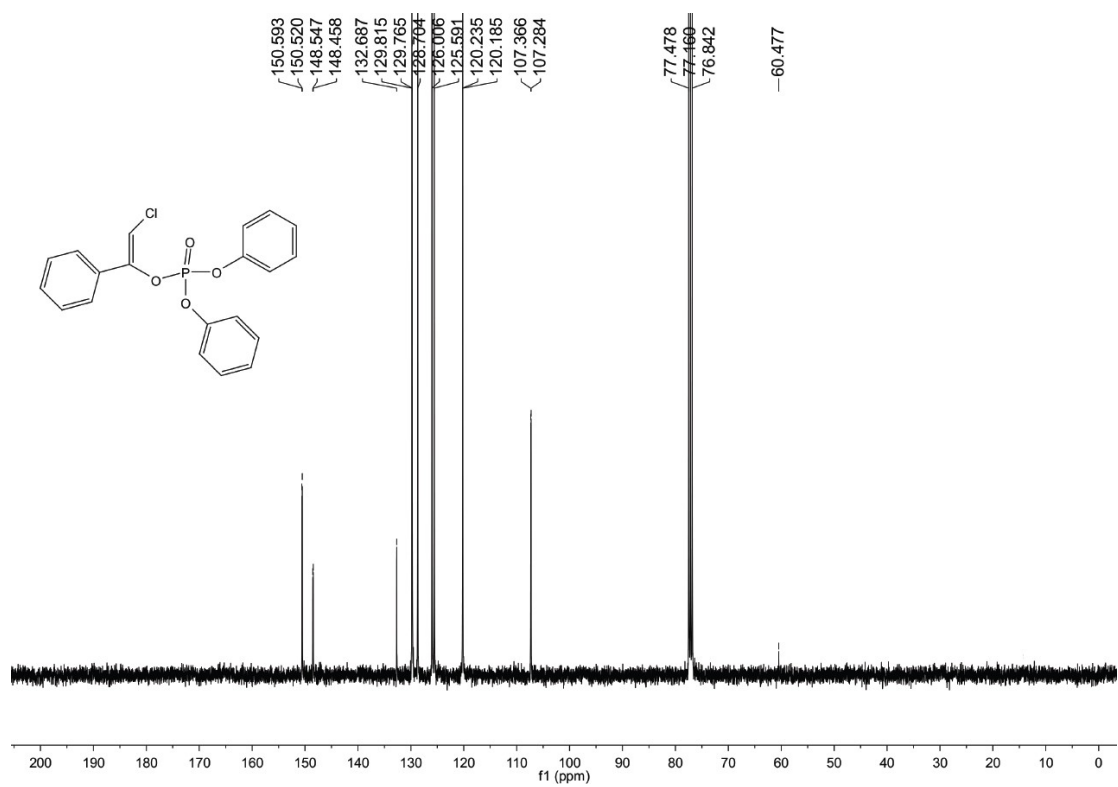

<sup>1</sup>H NMR and <sup>13</sup>C NMR of Compound 4p

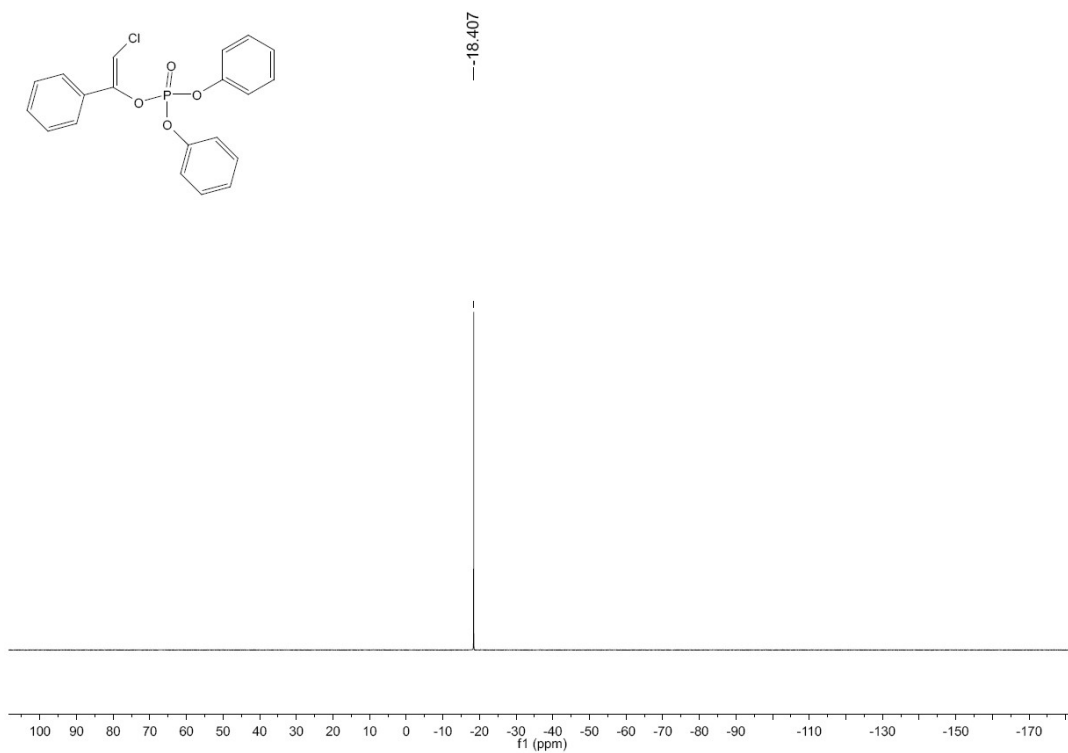

$^{31}\text{P}$  NMR of Compound **4p**
